# Supplementary material for: Switchable C2/C3 positional selectivity of thioisatins in a three-component domino reaction: combined computational and experimental studies
Source: Royal Society of Chemistry journal article supplement (doi:10.1039/d2ob01764d), 2022-01-01
Supplement: d2ob01764d1.pdf [file d2ob01764d1.pdf]

**Switchable C2/C3 positional selectivity of thioisatins in a three-component domino reaction: combined computational and experimental studies**

Baolin Liu,<sup>†</sup> Qingsong Deng,<sup>†</sup> Lei Zhang,<sup>\*‡</sup> Xiangtai Meng<sup>\*†</sup>

<sup>†</sup>Tianjin Key Laboratory of Organic Solar Cells and Photochemical Conversion, School of Chemistry & Chemical Engineering, Tianjin University of Technology, Tianjin 300384, P. R. China.

<sup>‡</sup>Tianjin Engineering Technology Center of Chemical Wastewater Source Reduction and Recycling, School of Science Tianjin Chengjian University, Tianjin 300384, P.R. China

**Table of contents:**

|                                                            |     |
|------------------------------------------------------------|-----|
| 1. General Experimental Information.....                   | S2  |
| 2. Optimization of Reaction Conditions <sup>a</sup> .....  | S2  |
| 3. General procedure for the synthesis of <b>4</b> .....   | S3  |
| 4. General procedure for the synthesis of <b>5</b> .....   | S3  |
| 5. Procedure for gram-scale reaction of <b>4a</b> .....    | S3  |
| 6. Synthetic procedure for <b>6,7</b> and <b>8</b> .....   | S3  |
| 7. Characterization of all new compounds.....              | S5  |
| 8. NMR spectra of all new compounds.....                   | S17 |
| 9. X-ray data collection and structure determinations..... | S48 |
| 10. X-ray Crystal Structures.....                          | S49 |
| 11. The results of CO detection by gas chromatography..... | S51 |
| 12. Computational Methods.....                             | S52 |
| 13. Computational Details.....                             | S77 |
| 14. References.....                                        | S77 |

## 1. General Experimental Information

All reactions were performed under Ar atmospheres in oven-dried glassware with magnetic stirring. The heat source of all reactions that require heating is an oil bath. Unless otherwise stated, all reagents were purchased from commercial suppliers (Aldrich, TCI or Alfa Aesar) and used without further purification. All solvents were purified and dried according to standard methods prior to use. TLC monitored all reactions with silica gel-coated plates. Flash column chromatography was performed using 200-300 mesh silicagel. <sup>1</sup>H- and <sup>13</sup>C-NMR spectrum was recorded at ambient temperature on Bruker 400 instruments. All spectra were referenced to CDCl<sub>3</sub> (<sup>1</sup>H NMR δ 7.26 ppm and <sup>13</sup>C NMR δ 77.00 ppm) and DMSO-d<sub>6</sub> (<sup>1</sup>H NMR, δ 2.50 ppm; <sup>13</sup>C NMR, δ 39.52 ppm). HRMS were obtained on Waters Xevo Q-TOF MS with ESI resource. Melting points were measured on a RY-I apparatus and are reported uncorrected. The evolved CO was detected using an online gas chromatography (GC7900, Techcomp) equipped with a 0.5 nm molecular sieve column.

## 2. Optimization of Reaction Conditions<sup>a</sup>

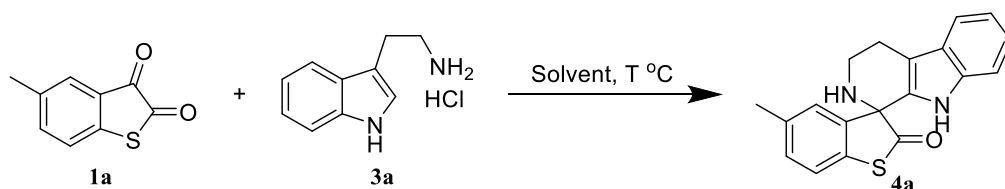

| Entry | 1a:3a | T (°C) | Solvent            | Yield 4a (%) <sup>b</sup> |
|-------|-------|--------|--------------------|---------------------------|
| 1     | 1:2.0 | R.T    | DMF                | N.R                       |
| 2     | 1:2.0 | 60     | DMF                | 42                        |
| 3     | 1:2.0 | 90     | DMF                | 64                        |
| 4     | 1:2.0 | 110    | DMF                | 51                        |
| 5     | 1:2.5 | 90     | DMF                | 89                        |
| 6     | 1:3.0 | 90     | DMF                | 86                        |
| 7     | 1:3.5 | 90     | DMF                | 73                        |
| 8     | 1:2.5 | 90     | EA                 | N.R                       |
| 9     | 1:2.5 | 90     | Toluene            | N.R                       |
| 10    | 1:2.5 | 90     | 1,4-dioxane        | N.R                       |
| 11    | 1:2.5 | 90     | CH <sub>3</sub> CN | N.R                       |
| 12    | 1:2.5 | 90     | THF                | N.R                       |
| 13    | 1:2.5 | 90     | DCE                | N.R                       |
| 14    | 1:2.5 | 90     | H <sub>2</sub> O   | N.R                       |
| 15    | 1:2.5 | 90     | EtOH               | 78                        |

<sup>a</sup>Reaction conditions: **1a** (0.5 mmol) and **3a** (1.25 mmol) in DMF (2 mL) at 90 °C. <sup>b</sup>Isolated yields.

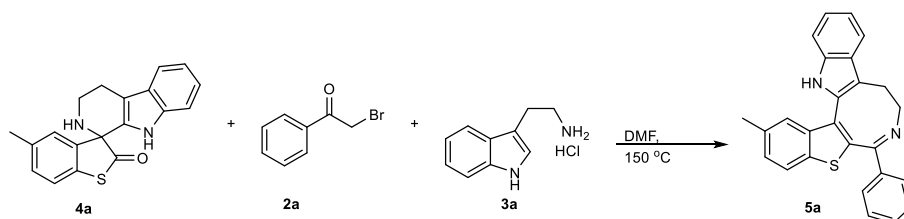

| Entry          | <b>4a:2a:3a</b> | Yield <b>5a</b> (%) <sup>c</sup> |
|----------------|-----------------|----------------------------------|
| 1              | 1.0:2.5:1.0     | 68                               |
| 2              | 1.0:2.5:2.0     | 72                               |
| 3              | 1.0:2.5:3.0     | 88                               |
| 4              | 1.0:2.5:4.0     | 80                               |
| 5 <sup>d</sup> | 1.0:2.5:3.0     | 39                               |

Reaction conditions: **4a** (0.3 mmol), **2a** (0.75 mmol) and **3a** (0.9 mmol) in DMF (4 mL) at 150 °C. <sup>c</sup>Isolated yields. <sup>d</sup>HCl replaces **3a**.

### 3. General procedure for the synthesis of **4**

Under Ar atmosphere, to a solution of **1** (0.50 mmol) in DMF 2 mL was added **3** (1.25 mmol), The reaction mixture was stirred at 90 °C for 4 h. After the mixture was distilled under reduced pressure. The solid was dissolved with DCM and concentrated. The residue was purified by column chromatography (ethyl acetate: petroleum ether = 1:3) to give **4a-p**.

### 4. General procedure for the synthesis of **5**

Under Ar atmosphere, to a solution of **4** (0.30 mmol) in DMF 5 mL was added **2** (0.75 mmol), and **3a** (0.90 mmol). The reaction mixture was stirred at 150 °C for 6 h. The reaction mixture was extracted with ethyl acetate (25 mL×3). The combined organic layers were dried over MgSO<sub>4</sub> and concentrated. The residue was purified by column chromatography (ethyl acetate: petroleum ether = 1:3) to give **5a-l**.

### 5. Procedure for gram-scale reaction of **4a**

Under Ar atmosphere, to a solution of **1a** (1 g, 5.61 mmol) in DMF 35 mL was added **3a** (2.76 g, 14.03 mmol). The reaction mixture was stirred at 90 °C for 4 h. The reaction mixture was extracted with ethyl acetate (100 mL×3). The combined organic layers were dried over MgSO<sub>4</sub> and concentrated. The residue was purified by column chromatography (ethyl acetate: petroleum ether = 1:3) to give **4a** (1.41 g, 78%) as yellow solid.

### 6. Synthetic procedure for **6,7** and **8**

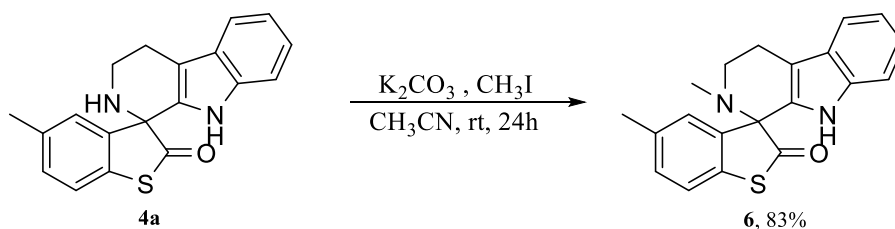

Under Ar atmosphere, to a solution of **4a** (96 mg, 0.30 mmol) and  $\text{K}_2\text{CO}_3$  (41 mg, 0.30 mmol) in  $\text{CH}_3\text{CN}$  2 mL was added  $\text{CH}_3\text{I}$  (51 mg, 0.36 mmol). The reaction mixture was stirred at room temperature for 24 h. After the reaction is complete (monitored by TLC), the reaction mixture was extracted with ethyl acetate (25 mL  $\times$  3). The combined organic layers were dried over  $\text{MgSO}_4$  and concentrated. The residue was purified by column chromatography (ethyl acetate/petroleum ether = 1:3) to give **6** (83 mg, 83%) as yellow solid.

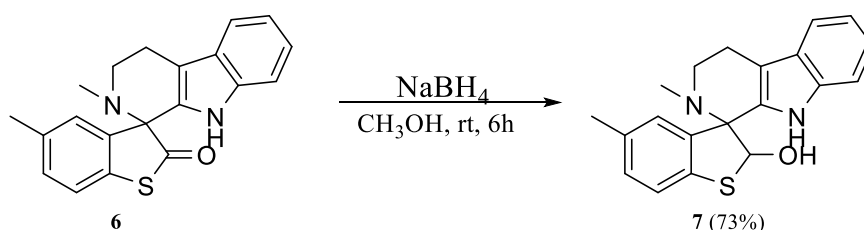

Under Ar atmosphere, to a solution of **6** (100 mg, 0.30 mmol) in  $\text{CH}_3\text{OH}$  2 mL was added  $\text{NaBH}_4$  (11 mg, 0.303 mmol). The reaction mixture was stirred at room temperature for 6 h. After the reaction is complete (monitored by TLC), the solvent was removed in vacuum. The residue was purified by column chromatography (ethyl acetate/petroleum ether = 1:3) to give **7** (74 mg, 73%) as yellow solid.

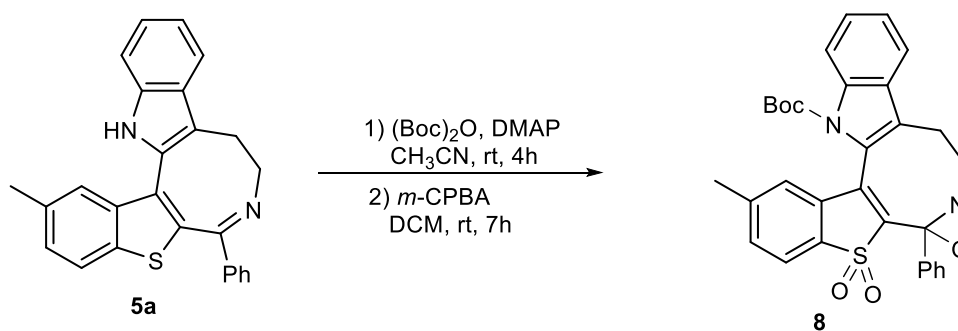

**Synthetic procedure for 8:** Under Ar atmosphere, to a  $\text{CH}_3\text{CN}$  (2 mL) solution of **5a** (39 mg, 0.1 mmol) was added  $(\text{Boc})_2\text{O}$  (65 mg, 0.3 mmol) and DMAP (1.2 mg, 0.01 mmol). The resulting mixture was stirred at room temperature for 4 h. After the reaction completed (monitored by TLC), the solvent was removed under reduce pressure, The crude product was used for the next step without further purification. Under Ar atmosphere, to a dry DCM (4 mL) solution of reaction mixture was added *m*-CPBA (69 mg, 0.4 mmol). The resulting mixture was stirred at room temperature for 7 h. After the reaction completed (monitored by TLC), the residue was dissolved by 50 mL DCM and then washed with saturated sodium bicarbonate solution. The combined organic layers were dried over  $\text{MgSO}_4$  and concentrated. The residue was

purified by column chromatography (ethyl acetate : petroleum ether = 1:3) to give **8** (29 mg, 54%) as white solid.

## 7. Characterization of all new compounds

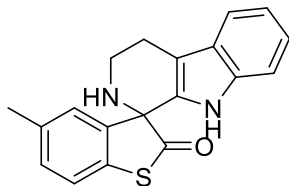

### **5-methyl-2',3',4',9'-tetrahydro-2H-spiro[benzo[b]thiophene-3,1'-pyrido[3,4-b]indol]-2-one (4a).**

The residue was purified by column chromatography (ethyl acetate/petroleum ether = 1:3) as a yellow solid: 143 mg (yield 89%); mp 210-212 °C; IR (KBr) 3303, 3078, 2926, 1710, 1456, 1298, 1098, 917, 747  $\text{cm}^{-1}$ ;  $^1\text{H}$  NMR (400 MHz,  $\text{CDCl}_3$ )  $\delta$  7.59 (d,  $J = 7.6$  Hz, 1H), 7.49 (s, 1H), 7.30 (d,  $J = 8.0$  Hz, 1H), 7.24 – 7.11 (m, 4H), 6.97 (s, 1H), 3.91 – 3.73 (m, 1H), 3.35 – 3.24 (m, 1H), 3.11 – 2.98 (m, 1H), 2.97 – 2.88 (m, 1H), 2.31 (s, 1H), 2.25 (s, 3H) ppm;  $^{13}\text{C}$  { $^1\text{H}$ } NMR (100 MHz,  $\text{CDCl}_3$ )  $\delta$  204.0, 137.9, 137.3, 136.2, 131.2, 130.7, 129.6, 127.4, 126.9, 123.2, 122.8, 119.7, 118.8, 112.6, 111.1, 70.6, 39.3, 21.6, 21.1 ppm.; HRMS (ESI-TOF)  $m/z$   $[\text{M} + \text{H}]^+$  calcd for  $\text{C}_{19}\text{H}_{17}\text{N}_2\text{OS}^+$  321.1056, found 321.1056.

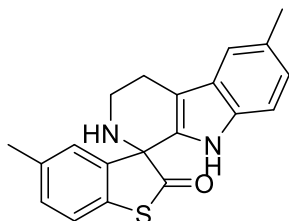

### **5,6'-dimethyl-2',3',4',9'-tetrahydro-2H-spiro[benzo[b]thiophene-3,1'-pyrido[3,4-b]indol]-2-one (4b).**

The residue was purified by column chromatography (ethyl acetate/petroleum ether = 1:3) as a yellow solid: 119 mg (yield 71%); mp 159-161 °C; IR (KBr) 3319, 2847, 2359, 1697, 1453, 1205, 1073, 813  $\text{cm}^{-1}$ ;  $^1\text{H}$  NMR (400 MHz,  $\text{CDCl}_3$ )  $\delta$  7.37 (s, 2H), 7.29 (d,  $J = 8.0$  Hz, 1H), 7.22 – 7.15 (m, 1H), 7.11 (d,  $J = 8.0$  Hz, 1H), 7.00 (dd,  $J = 8.0, 1.2$  Hz, 1H), 6.98 – 6.93 (m, 1H), 3.90 – 3.70 (m, 1H), 3.38 – 3.20 (m, 1H), 3.07 – 2.95 (m, 1H), 2.94 – 2.82 (m, 1H), 2.45 (s, 3H), 2.25 (s, 3H) ppm;  $^{13}\text{C}$  { $^1\text{H}$ } NMR (100 MHz,  $\text{CDCl}_3$ )  $\delta$  204.1, 138.2, 137.3, 134.5, 131.0, 130.6, 129.8, 129.0, 127.4, 127.1, 124.2, 123.1, 118.4, 112.1, 110.7, 70.7, 39.3, 21.6, 21.4, 21.0 ppm; HRMS (ESI-TOF)  $m/z$   $[\text{M} + \text{H}]^+$  calcd for  $\text{C}_{20}\text{H}_{19}\text{N}_2\text{OS}^+$  335.1213, found 335.1220.

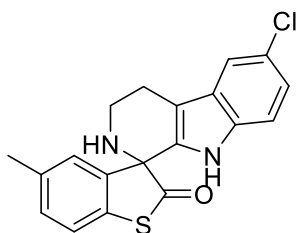

### **6'-chloro-5-methyl-2',3',4',9'-tetrahydro-2H-spiro[benzo[b]thiophene-3,1'-pyrido[3,4-b]indol]-2-one (4c).**

The residue was purified by column chromatography (ethyl acetate/petroleum ether = 1:3) as a yellow solid: 103 mg (yield 58%); mp 167-169 °C; IR (KBr) 3314, 2939, 1711, 1450, 1300, 1062, 928, 802  $\text{cm}^{-1}$ ;  $^1\text{H}$  NMR (400 MHz,  $\text{CDCl}_3$ )  $\delta$  7.54 (s, 2H), 7.30 (d,  $J = 8.0$  Hz, 1H), 7.23 – 7.15 (m, 1H), 7.11 (d,  $J = 1.2$  Hz, 2H), 7.00 – 6.91 (m, 1H), 3.93 – 3.75 (m, 1H), 3.35 – 3.23 (m, 1H), 3.06 – 2.93 (m, 1H), 2.92 – 2.81 (m, 1H), 2.30 (s, 1H), 2.26 (s, 3H) ppm;  $^{13}\text{C}$  { $^1\text{H}$ } NMR (100 MHz,  $\text{CDCl}_3$ )  $\delta$  203.9, 137.8,

137.5, 134.5, 131.3, 131.2, 130.7, 128.0, 127.3, 125.5, 123.3, 123.0, 118.4, 112.3, 112.1, 70.6, 39.1, 21.5, 21.1 ppm; HRMS (ESI-TOF)  $m/z$   $[M + H]^+$  calcd for  $C_{19}H_{16}ClN_2OS^+$  355.0666, found 355.0682.

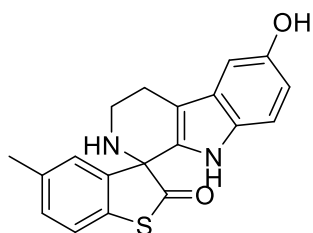

**6'-hydroxy-5-methyl-2',3',4',9'-tetrahydro-2H-spiro[benzo[b]thiophene-3,1'-pyrido[3,4-b]indol]-2-one (4d).**

The residue was purified by column chromatography (ethyl acetate/petroleum ether = 1:1) as a yellow solid: 94 mg (yield 56%); mp 155-157 °C; IR (KBr) 3295, 2963, 1714, 1468, 1262, 1075, 1021, 797  $cm^{-1}$ ;  $^1H$  NMR (400 MHz, DMSO)  $\delta$  10.23 (s, 1H), 8.67 (s, 1H), 7.47 (d,  $J = 8.0$  Hz, 1H), 7.27 – 7.19 (m, 1H), 6.97 (d,  $J = 8.8$  Hz, 1H), 6.91 – 6.84 (m, 1H), 6.77 (d,  $J = 2.4$  Hz, 1H), 6.56 (dd,  $J = 8.8, 2.4$  Hz, 1H), 3.67 (s, 1H), 3.48 (td,  $J = 12.4, 4.0$  Hz, 1H), 3.05 (dd,  $J = 12.0, 4.8$  Hz, 1H), 2.85 – 2.72 (m, 1H), 2.66 – 2.57 (m, 1H), 2.22 (s, 3H) ppm;  $^{13}C\{^1H\}$  NMR (100 MHz, DMSO)  $\delta$  205.1, 150.5, 139.4, 136.1, 131.2, 130.8, 130.4, 127.2, 126.9, 123.1, 111.7, 111.7, 109.9, 102.1, 70.4, 38.4, 21.4, 20.6 ppm; HRMS (ESI-TOF)  $m/z$   $[M + H]^+$  calcd for  $C_{19}H_{17}N_2O_2S^+$  337.1005, found 337.1006.

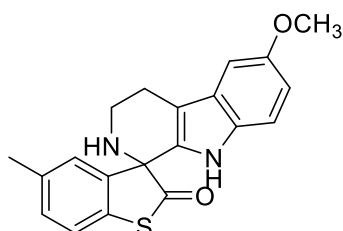

**6'-methoxy-5-methyl-2',3',4',9'-tetrahydro-2H-spiro[benzo[b]thiophene-3,1'-pyrido[3,4-b]indol]-2-one (4e).**

The residue was purified by column chromatography (ethyl acetate/petroleum ether = 1:3) as a yellow solid: 112 mg (yield 64%); mp 170-172 °C; IR (KBr) 3293, 2842, 1719, 1470, 1217, 1025, 950, 809  $cm^{-1}$ ;  $^1H$  NMR (400 MHz,  $CDCl_3$ )  $\delta$  7.38 (s, 1H), 7.29 (d,  $J = 8.0$  Hz, 1H), 7.22 – 7.17 (m, 1H), 7.10 (d,  $J = 8.8$  Hz, 1H), 7.02 (d,  $J = 2.4$  Hz, 1H), 6.98 – 6.96 (m, 1H), 6.82 (dd,  $J = 8.8, 2.4$  Hz, 1H), 3.86 (s, 3H), 3.85 – 3.79 (m, 1H), 3.33 – 3.21 (m, 1H), 3.07 – 2.96 (m, 1H), 2.93 – 2.83 (m, 1H), 2.30 (s, 1H), 2.25 (s, 3H) ppm;  $^{13}C\{^1H\}$  NMR (100 MHz,  $CDCl_3$ )  $\delta$  204.1, 154.2, 138.1, 137.3, 131.3, 131.1, 130.6, 130.5, 127.4, 127.3, 123.2, 112.8, 112.3, 111.8, 100.8, 70.7, 56.0, 39.3, 21.7, 21.1 ppm; HRMS (ESI-TOF)  $m/z$   $[M + H]^+$  calcd for  $C_{20}H_{19}N_2O_2S^+$  351.1162, found 351.1167.

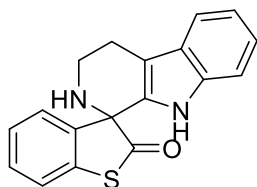

**2',3',4',9'-tetrahydro-2H-spiro[benzo[b]thiophene-3,1'-pyrido[3,4-b]indol]-2-one (4f).**

The residue was purified by column chromatography (ethyl acetate/petroleum ether = 1:3) as a white solid: 106 mg (yield 69%); mp 140-142 °C; IR (KBr) 3175, 2931, 1701, 1451, 1298, 1078, 880, 751  $cm^{-1}$ ;  $^1H$  NMR (400 MHz,  $CDCl_3$ )  $\delta$  7.58 (d,  $J = 7.2$  Hz, 1H), 7.48 (s, 1H), 7.45 – 7.36 (m, 2H), 7.22 (d,  $J = 8.0$  Hz, 1H), 7.16 (dd,  $J = 17.2, 8.8$  Hz, 4H), 3.87 – 3.79 (m, 1H), 3.34 – 3.23 (m, 1H), 3.09 – 2.98

(m, 1H), 2.97 – 2.87 (m, 1H) ppm;  $^{13}\text{C}\{^1\text{H}\}$  NMR (100 MHz,  $\text{CDCl}_3$ )  $\delta$  203.6, 138.2, 136.3, 134.3, 130.3, 129.5, 127.2, 126.9, 123.4, 122.8, 119.7, 118.8, 112.7, 111.1, 70.6, 39.2, 21.6 ppm; HRMS (ESI-TOF)  $m/z$   $[\text{M} + \text{H}]^+$  calcd for  $\text{C}_{18}\text{H}_{15}\text{N}_2\text{OS}^+$  307.0900, found 307.0891.

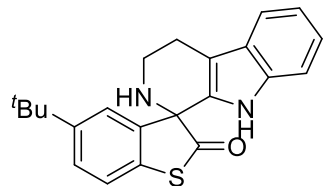

**5-(tert-butyl)-2',3',4',9'-tetrahydro-2H-spiro[benzo[b]thiophene-3,1'-pyrido[3,4-b]indol]-2-one (4g).**

The residue was purified by column chromatography (ethyl acetate/petroleum ether = 1:3) as a yellow solid: 145 mg (yield 80%); mp 177-179 °C; IR (KBr) 3309, 2957, 1715, 1456, 1362, 1070, 913, 748  $\text{cm}^{-1}$ ;  $^1\text{H}$  NMR (400 MHz,  $\text{CDCl}_3$ )  $\delta$  7.62 – 7.57 (m, 1H), 7.49 (s, 1H), 7.44 (dd,  $J$  = 8.0, 2.0 Hz, 1H), 7.35 (d,  $J$  = 8.4 Hz, 1H), 7.24 – 7.11 (m, 4H), 3.98 – 3.73 (m, 1H), 3.40 – 3.23 (m, 1H), 3.16 – 2.99 (m, 1H), 2.98 – 2.86 (m, 1H), 1.23 (s, 9H) ppm;  $^{13}\text{C}\{^1\text{H}\}$  NMR (100 MHz,  $\text{CDCl}_3$ )  $\delta$  204.3, 150.9, 137.8, 136.3, 130.9, 129.8, 127.7, 127.0, 123.5, 123.0, 122.6, 119.6, 118.7, 112.5, 111.1, 71.0, 39.3, 34.8, 31.3, 21.6 ppm; HRMS (ESI-TOF)  $m/z$   $[\text{M} + \text{H}]^+$  calcd for  $\text{C}_{22}\text{H}_{23}\text{N}_2\text{OS}^+$  363.1526, found 363.1522.

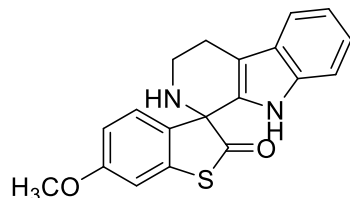

**6-methoxy-2',3',4',9'-tetrahydro-2H-spiro[benzo[b]thiophene-3,1'-pyrido[3,4-b]indol]-2-one (4h).**

The residue was purified by column chromatography (ethyl acetate/petroleum ether = 1:3) as a yellow solid: 122 mg (yield 72%); mp 160-162 °C; IR (KBr) 3150, 2936, 1702, 1574, 1493, 1241, 1032, 751  $\text{cm}^{-1}$ ;  $^1\text{H}$  NMR (400 MHz,  $\text{CDCl}_3$ )  $\delta$  7.57 (d,  $J$  = 7.6 Hz, 1H), 7.48 (s, 1H), 7.23 – 7.10 (m, 3H), 7.05 (d,  $J$  = 8.8 Hz, 1H), 6.94 (d,  $J$  = 2.4 Hz, 1H), 6.72 (dd,  $J$  = 8.4, 2.4 Hz, 1H), 3.83 (s, 3H), 3.86 – 3.78 (m, 1H), 3.35 – 3.23 (m, 1H), 3.06 – 2.97 (m, 1H), 2.94 – 2.87 (m, 1H) ppm;  $^{13}\text{C}\{^1\text{H}\}$  NMR (100 MHz,  $\text{CDCl}_3$ )  $\delta$  203.6, 161.0, 136.2, 135.5, 129.88, 129.86, 127.7, 127.0, 122.7, 119.7, 118.8, 113.0, 112.7, 111.1, 109.0, 70.2, 55.6, 39.2, 21.6 ppm; HRMS (ESI-TOF)  $m/z$   $[\text{M} + \text{H}]^+$  calcd for  $\text{C}_{19}\text{H}_{17}\text{N}_2\text{O}_2\text{S}^+$  337.1005, found 337.1001.

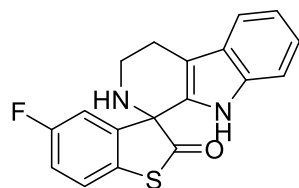

**5-fluoro-2',3',4',9'-tetrahydro-2H-spiro[benzo[b]thiophene-3,1'-pyrido[3,4-b]indol]-2-one (4i).**

The residue was purified by column chromatography (ethyl acetate/petroleum ether = 1:3) as a white solid: 117 mg (yield 72%); mp 159-161 °C; IR (KBr) 3141, 2932, 1714, 1456, 1264, 1076, 833, 739  $\text{cm}^{-1}$ ;  $^1\text{H}$  NMR (400 MHz, DMSO)  $\delta$  10.66 (s, 1H), 7.69 (dd,  $J$  = 8.8, 5.2 Hz, 1H), 7.49 (d,  $J$  = 7.6 Hz, 1H), 7.38 – 7.28 (m, 1H), 7.20 (d,  $J$  = 8.0 Hz, 1H), 7.06 (t,  $J$  = 6.8 Hz, 1H), 6.99 (t,  $J$  = 7.6 Hz, 1H), 6.86 (dd,  $J$  = 8.8, 2.8 Hz, 1H), 3.90 (s, 1H), 3.60 – 3.45 (m, 1H), 3.19 – 3.05 (m, 1H), 2.97 – 2.81 (m, 1H), 2.74 (dd,  $J$  = 15.2, 2.8 Hz, 1H) ppm;  $^{13}\text{C}\{^1\text{H}\}$  NMR (100 MHz, DMSO)  $\delta$  204.8, 161.3 (d,  $J_{\text{C-F}}$  = 241.8 Hz), 141.4 (d,  $J_{\text{C-F}}$  = 7.5 Hz), 136.4, 130.1, 129.2 (d,  $J_{\text{C-F}}$  = 2.8 Hz), 126.2, 125.0 (d,  $J_{\text{C-F}}$  = 7.7 Hz), 121.7, 118.6, 118.2, 117.1 (d,  $J_{\text{C-F}}$  = 22.5 Hz), 113.9 (d,  $J_{\text{C-F}}$  = 23.6 Hz), 111.4, 111.1, 70.7 (d,

$J_{C-F} = 1.9$  Hz), 38.3, 21.2 ppm; HRMS (ESI-TOF)  $m/z$   $[M + H]^+$  calcd for  $C_{18}H_{14}FN_2OS^+$  325.0805, found 325.0810.

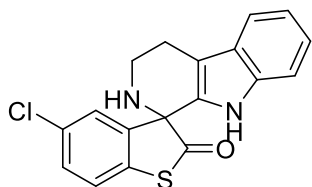

**5-chloro-2',3',4',9'-tetrahydro-2H-spiro[benzo[b]thiophene-3,1'-pyrido[3,4-b]indol]-2-one (4j).**

The residue was purified by column chromatography (ethyl acetate/petroleum ether = 1:3) as a white solid: 120 mg (yield 70%); mp 135-137 °C; IR (KBr) 3195, 2978, 1714, 1450, 1259, 1089, 827, 738  $cm^{-1}$ ;  $^1H$  NMR (400 MHz,  $CDCl_3$ )  $\delta$  7.59 (d,  $J = 7.6$  Hz, 1H), 7.50 (s, 1H), 7.36 (d,  $J = 2.0$  Hz, 2H), 7.25 – 7.11 (m, 4H), 3.88 – 3.74 (m, 1H), 3.47 – 3.22 (m, 1H), 3.14 – 2.97 (m, 1H), 2.96 – 2.86 (m, 1H) ppm;  $^{13}C\{^1H\}$  NMR (100 MHz,  $CDCl_3$ )  $\delta$  202.9, 139.9, 136.3, 133.2, 132.4, 130.5, 128.8, 127.2, 126.8, 124.5, 123.0, 119.9, 118.9, 112.9, 111.1, 70.9, 39.3, 21.6 ppm; HRMS (ESI-TOF)  $m/z$   $[M + H]^+$  calcd for  $C_{18}H_{14}ClN_2OS^+$  341.0510, found 341.0515.

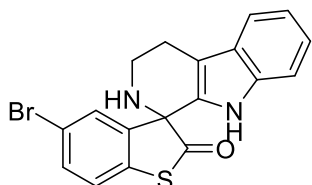

**5-bromo-2',3',4',9'-tetrahydro-2H-spiro[benzo[b]thiophene-3,1'-pyrido[3,4-b]indol]-2-one (4k).**

The residue was purified by column chromatography (ethyl acetate/petroleum ether = 1:3) as a yellow solid: 123 mg (yield 64%); mp 150-152 °C; IR (KBr) 3165, 2941, 1675, 1453, 1296, 1077, 842, 754  $cm^{-1}$ ;  $^1H$  NMR (400 MHz,  $CDCl_3$ )  $\delta$  7.60 (d,  $J = 7.2$  Hz, 2H), 7.50 (dd,  $J = 8.4, 2.0$  Hz, 1H), 7.30 (d,  $J = 2.0$  Hz, 1H), 7.28 (s, 1H), 7.21 – 7.12 (m, 3H), 3.86 – 3.74 (m, 1H), 3.33 – 3.22 (m, 1H), 3.08 – 2.98 (m, 1H), 2.96 – 2.87 (m, 1H), 2.30 (s, 1H) ppm;  $^{13}C\{^1H\}$  NMR (100 MHz,  $CDCl_3$ )  $\delta$  202.7, 140.1, 136.3, 133.3, 133.1, 129.9, 128.7, 126.7, 124.7, 123.0, 120.7, 119.8, 118.8, 112.9, 111.1, 70.8, 39.2, 21.5 ppm; HRMS (ESI-TOF)  $m/z$   $[M + H]^+$  calcd for  $C_{18}H_{14}BrN_2OS^+$  385.0005, found 385.0013.

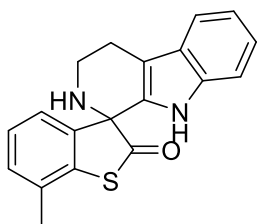

**7-methyl-2',3',4',9'-tetrahydro-2H-spiro[benzo[b]thiophene-3,1'-pyrido[3,4-b]indol]-2-one (4l).**

The residue was purified by column chromatography (ethyl acetate/petroleum ether = 1:3) as a yellow solid: 126 mg (yield 79%); mp 156-158 °C; IR (KBr) 3164, 2938, 1716, 1450, 1298, 1063, 923, 742  $cm^{-1}$ ;  $^1H$  NMR (400 MHz,  $CDCl_3$ )  $\delta$  7.58 (d,  $J = 7.6$  Hz, 1H), 7.44 (s, 1H), 7.23 – 7.19 (m, 2H), 7.18 – 7.10 (m, 3H), 6.98 (d,  $J = 7.6$  Hz, 1H), 3.88 – 3.76 (m, 1H), 3.36 – 3.25 (m, 1H), 3.06 – 2.97 (m, 1H), 2.95 – 2.88 (m, 1H), 2.39 (s, 3H), 2.29 (s, 1H) ppm;  $^{13}C\{^1H\}$  NMR (100 MHz,  $CDCl_3$ )  $\delta$  203.7, 138.2, 136.3, 134.1, 132.8, 131.1, 129.7, 127.0, 126.9, 123.9, 122.7, 119.7, 118.8, 112.6, 111.1, 71.3, 39.3, 21.7, 20.6 ppm; HRMS (ESI-TOF)  $m/z$   $[M + H]^+$  calcd for  $C_{19}H_{17}N_2OS^+$  321.1056, found 321.1056.



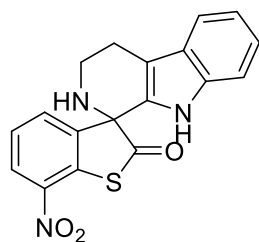

**7-nitro-2',3',4',9'-tetrahydro-2H-spiro[benzo[b]thiophene-3,1'-pyrido[3,4-b]indol]-2-one (4m).**

The residue was purified by column chromatography (ethyl acetate/petroleum ether = 1:3) as a brown solid: 115 mg (yield 65%); mp 170-172 °C; IR (KBr) 3068, 2921, 1716, 1516, 1441, 1126, 978, 827  $\text{cm}^{-1}$ ;  $^1\text{H}$  NMR (400 MHz, DMSO)  $\delta$  10.64 (s, 1H), 8.43 (dd,  $J = 8.0, 1.6$  Hz, 1H), 7.57 – 7.47 (m, 3H), 7.17 (d,  $J = 8.0$  Hz, 1H), 7.10 – 6.98 (m, 2H), 4.10 (s, 1H), 3.60 (td,  $J = 12.0, 4.0$  Hz, 1H), 3.14 (dd,  $J = 12.0, 5.2$  Hz, 1H), 2.97 – 2.83 (m, 1H), 2.78 (dd,  $J = 15.2, 2.8$  Hz, 1H) ppm;  $^{13}\text{C}\{^1\text{H}\}$  NMR (100 MHz, DMSO)  $\delta$  205.3, 142.7, 141.9, 136.3, 133.0, 132.9, 129.7, 127.7, 126.1, 126.0, 121.9, 118.8, 118.3, 111.3, 111.1, 68.5, 38.3, 21.2 ppm; HRMS (ESI-TOF)  $m/z$   $[\text{M} + \text{H}]^+$  calcd for  $\text{C}_{18}\text{H}_{14}\text{N}_3\text{O}_3\text{S}^+$  352.0750, found 352.0755.

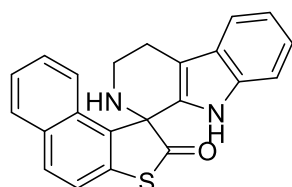

**2',3',4',9'-tetrahydro-2H-spiro[naphtho[2,1-b]thiophene-1,1'-pyrido[3,4-b]indol]-2-one (4n).**

The residue was purified by column chromatography (ethyl acetate/petroleum ether = 1:3) as a yellow solid: 137 mg (yield 77%); mp 181-183 °C; IR (KBr) 3266, 2901, 1659, 1508, 1432, 1131, 820, 737  $\text{cm}^{-1}$ ;  $^1\text{H}$  NMR (400 MHz, DMSO)  $\delta$  10.87 (s, 1H), 9.04 (d,  $J = 8.4$  Hz, 1H), 8.28 (d,  $J = 8.4$  Hz, 1H), 8.04 (d,  $J = 8.0$  Hz, 1H), 7.77 – 7.71 (m, 1H), 7.66 – 7.56 (m, 2H), 7.45 (d,  $J = 7.6$  Hz, 1H), 7.18 (d,  $J = 8.0$  Hz, 1H), 7.11 – 7.02 (m, 1H), 6.99 (t,  $J = 7.2$  Hz, 1H), 4.30 (d,  $J = 2.4$  Hz, 1H), 3.49 – 3.39 (m, 1H), 3.03 (td,  $J = 11.2, 4.4$  Hz, 1H), 2.88 – 2.70 (m, 2H) ppm;  $^{13}\text{C}\{^1\text{H}\}$  NMR (100 MHz, DMSO)  $\delta$  199.7, 157.2, 137.5, 136.2, 131.07, 131.05, 130.6, 129.9, 129.0, 126.0, 125.7, 123.4, 121.9, 121.8, 120.6, 118.6, 118.0, 111.3, 81.8, 42.6, 21.2 ppm; HRMS (ESI-TOF)  $m/z$   $[\text{M} + \text{H}]^+$  calcd for  $\text{C}_{22}\text{H}_{17}\text{N}_2\text{O}_3\text{S}^+$  357.1056, found 357.1063.

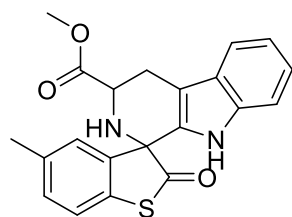

**methyl-5-methyl-2-oxo-2',3',4',9'-tetrahydro-2H-spiro[benzo[b]thiophene-3,1'-pyrido[3,4-b]indole]-3'-carboxylate (4o).**

The residue was purified by column chromatography (ethyl acetate/petroleum ether = 1:3) as a yellow solid: 152 mg (yield 80%); mp 122-124 °C; IR (KBr) 3389, 2897, 1729, 1445, 1336, 1231, 1143, 1006, 925, 836, 743  $\text{cm}^{-1}$ ;  $^1\text{H}$  NMR (400 MHz,  $\text{CDCl}_3$ )  $\delta$  7.59 (d,  $J = 7.6$  Hz, 1H), 7.52 (s, 1H), 7.31 (d,  $J = 7.6$  Hz, 1H), 7.25 – 7.11 (m, 4H), 7.06 – 6.99 (m, 1H), 4.85 (dd,  $J = 11.2, 4.4$  Hz, 1H), 3.82 (s, 3H), 3.36 (dd,  $J = 15.6, 4.4$  Hz, 1H), 3.04 (dd,  $J = 15.2, 11.2$  Hz, 2H), 2.25 (s, 3H) ppm;  $^{13}\text{C}\{^1\text{H}\}$  NMR (100 MHz,  $\text{CDCl}_3$ )  $\delta$  204.7, 172.9, 137.5, 137.1, 136.6, 131.4, 130.6, 130.0, 128.0, 126.7, 123.2, 123.0,

120.0, 118.8, 111.5, 111.2, 70.6, 52.4, 51.5, 24.9, 21.1 ppm; HRMS (ESI-TOF)  $m/z$   $[M + H]^+$  calcd for  $C_{21}H_{19}N_2O_3S^+$  378.1032, found 378.1032.

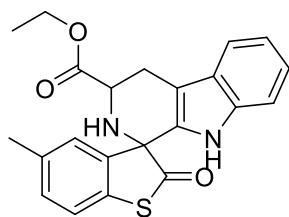

***ethyl-5-methyl-2-oxo-2',3',4',9'-tetrahydro-2H-spiro[benzo[b]thiophene-3,1'-pyrido[3,4-b]indole]-3'-carboxylate (4p).***

The residue was purified by column chromatography (ethyl acetate/petroleum ether = 1:3) as a yellow solid: 155 mg (yield 79%); mp 96-98 °C; IR (KBr) 3336, 2925, 1711, 1460, 1335, 1274, 1182, 1034, 923, 811, 741  $cm^{-1}$ ;  $^1H$  NMR (400 MHz,  $CDCl_3$ )  $\delta$  7.60 (d,  $J = 7.2$  Hz, 1H), 7.49 (s, 1H), 7.31 (d,  $J = 8.0$  Hz, 1H), 7.25 – 7.12 (m, 4H), 7.02 (s, 1H), 4.82 (dd,  $J = 10.8, 4.0$  Hz, 1H), 4.32 – 4.24 (m, 2H), 3.36 (dd,  $J = 15.6, 4.4$  Hz, 1H), 3.03 (dd,  $J = 15.2, 11.2$  Hz, 2H), 2.25 (s, 3H), 1.35 (t,  $J = 6.8$  Hz, 3H) ppm;  $^{13}C\{^1H\}$  NMR (100 MHz,  $CDCl_3$ )  $\delta$  204.7, 172.5, 137.4, 137.1, 136.5, 131.3, 130.5, 130.0, 128.0, 126.7, 123.1, 122.9, 119.9, 118.8, 111.5, 111.2, 70.6, 61.4, 51.4, 24.9, 21.0, 14.2 ppm; HRMS (ESI-TOF)  $m/z$   $[M + H]^+$  calcd for  $C_{22}H_{21}N_2O_3S^+$  393.1267, found 393.1269.

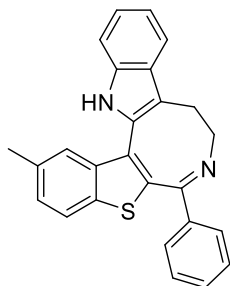

***(Z)-2-methyl-6-phenyl-9,14-dihydro-8H-benzo[4',5']thieno[3',2':6,7]azocino[5,4-b]indole (5a).***

The residue was purified by column chromatography (ethyl acetate/petroleum ether = 1:5) as a white solid: 104 mg (yield 88%); mp 266-268 °C; IR (KBr) 3207, 3046, 2885, 2337, 1699, 1576, 1458, 1296, 1215, 929, 802, 740, 668, 596  $cm^{-1}$ ;  $^1H$  NMR (400 MHz,  $CDCl_3$ )  $\delta$  8.14 (s, 1H), 7.84 (s, 1H), 7.79 (d,  $J = 8.4$  Hz, 1H), 7.71 – 7.66 (m, 2H), 7.60 (d,  $J = 8.0$  Hz, 1H), 7.42 – 7.29 (m, 5H), 7.29 – 7.20 (m, 1H), 7.18 – 7.12 (m, 1H), 4.40 – 4.23 (m, 2H), 3.74 – 3.61 (m, 1H), 3.37 – 3.23 (m, 1H), 2.51 (s, 3H) ppm;  $^{13}C\{^1H\}$  NMR (100 MHz,  $CDCl_3$ )  $\delta$  164.1, 139.2, 138.2, 137.8, 135.8, 135.2, 133.6, 130.4, 130.0, 129.1, 128.6, 128.0, 127.5, 126.7, 123.7, 123.0, 122.6, 119.7, 119.2, 112.3, 110.6, 51.7, 25.8, 21.6 ppm; HRMS (ESI-TOF)  $m/z$   $[M + H]^+$  calcd for  $C_{26}H_{20}N_2S^+$  393.1420, found 393.1421.

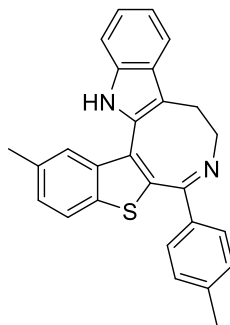

***(Z)-2-methyl-6-(p-tolyl)-9,14-dihydro-8H-benzo[4',5']thieno[3',2':6,7]azocino[5,4-b]indole (5b).***

The residue was purified by column chromatography (ethyl acetate/petroleum ether = 1:5) as a yellow

solid: 108 mg (yield 89%); mp 187-189 °C; IR (KBr) 3345, 3149, 2925, 2338, 1592, 1458, 1297, 1122, 1012, 799, 737, 652 cm<sup>-1</sup>; <sup>1</sup>H NMR (400 MHz, DMSO) δ 11.28 (s, 1H), 7.99 (d, *J* = 8.4 Hz, 1H), 7.76 (s, 1H), 7.52 (d, *J* = 8.0 Hz, 3H), 7.42 – 7.32 (m, 2H), 7.19 (d, *J* = 8.0 Hz, 2H), 7.18 – 7.09 (m, 1H), 7.07 – 6.98 (m, 1H), 4.25 – 4.20 (m, 1H), 4.07 – 3.97 (m, 1H), 3.51 – 3.40 (m, 1H), 3.24 – 3.15 (m, 1H), 2.46 (s, 3H), 2.29 (s, 3H) ppm; <sup>13</sup>C{<sup>1</sup>H} NMR (100 MHz, DMSO) δ 162.8, 140.5, 138.0, 136.8, 136.2, 135.7, 134.6, 132.1, 130.4, 128.8, 128.3, 128.0, 127.5, 126.6, 124.4, 122.6, 122.2, 118.8, 118.5, 111.2, 110.1, 51.0, 25.4, 21.6, 20.9 ppm; HRMS (ESI-TOF) *m/z* [M + H]<sup>+</sup> calcd for C<sub>27</sub>H<sub>22</sub>N<sub>2</sub>S<sup>+</sup> 407.1576, found 407.1576.

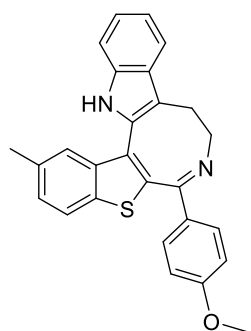

**(Z)-6-(4-methoxyphenyl)-2-methyl-9,14-dihydro-8H-benzo[4',5']thieno[3',2':6,7]azocino[5,4-b]indole (5c).**

The residue was purified by column chromatography (ethyl acetate/petroleum ether = 1:5) as a white solid: 106 mg (yield 84%); mp 255-257 °C; IR (KBr) 3343, 3149, 2832, 2362, 1595, 1510, 1442, 1259, 1176, 1032, 832, 736, 649 cm<sup>-1</sup>; <sup>1</sup>H NMR (400 MHz, CDCl<sub>3</sub>) δ 8.17 (s, 1H), 7.84 (s, 1H), 7.79 (d, *J* = 8.4 Hz, 1H), 7.69 – 7.57 (m, 3H), 7.38 (d, *J* = 8.0 Hz, 1H), 7.31 (dd, *J* = 8.4, 1.2 Hz, 1H), 7.25 – 7.22 (m, 1H), 7.17 – 7.12 (m, 1H), 6.84 – 6.80 (m, 2H) 4.33 – 4.20 (m, 2H), 3.79 (s, 3H), 3.71 – 3.61 (m, 1H), 3.28 (dt, *J* = 16.8, 2.8 Hz, 1H), 2.50 (s, 3H) ppm; <sup>13</sup>C{<sup>1</sup>H} NMR (100 MHz, CDCl<sub>3</sub>) δ 163.3, 161.4, 138.3, 137.7, 135.8, 135.1, 133.7, 132.0, 130.2, 129.8, 129.1, 127.5, 126.8, 123.7, 122.9, 122.5, 119.6, 119.2, 113.3, 112.3, 110.5, 55.3, 51.4, 25.8, 21.6 ppm; HRMS (ESI-TOF) *m/z* [M + H]<sup>+</sup> calcd for C<sub>27</sub>H<sub>22</sub>N<sub>2</sub>OS<sup>+</sup> 423.1526, found 423.1527.

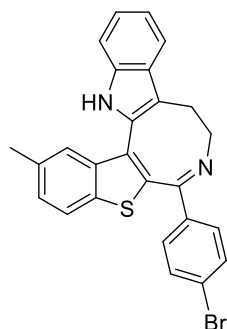

**(Z)-6-(4-bromophenyl)-2-methyl-9,14-dihydro-8H-benzo[4',5']thieno[3',2':6,7]azocino[5,4-b]indole (5d).**

The residue was purified by column chromatography (ethyl acetate/petroleum ether = 1:5) as a yellow solid: 114 mg (yield 81%); mp 206-208 °C; IR (KBr) 3403, 3172, 3081, 2885, 2365, 1585, 1486, 1296, 1077, 1008, 924, 802, 738, 609 cm<sup>-1</sup>; <sup>1</sup>H NMR (400 MHz, CDCl<sub>3</sub>) δ 8.12 (s, 1H), 7.84 (s, 1H), 7.79 (d, *J* = 8.4 Hz, 1H), 7.61 (d, *J* = 8.4 Hz, 1H), 7.58 – 7.54 (m, 2H), 7.47 – 7.42 (m, 2H), 7.40 (d, *J* = 8.0 Hz, 1H), 7.32 (dd, *J* = 8.4, 1.2 Hz, 1H), 7.26 – 7.24 (m, 1H), 7.18 – 7.14 (m, 1H), 4.36 – 4.31 (m, 1H), 4.30 – 4.22 (m, 1H), 3.71 – 3.61 (m, 1H), 3.31 (dt, *J* = 16.8, 2.8 Hz, 1H), 2.51 (s, 3H) ppm; <sup>13</sup>C{<sup>1</sup>H} NMR (100 MHz, CDCl<sub>3</sub>) δ 163.2, 138.2, 138.0, 137.8, 135.8, 135.3, 132.7, 131.2, 130.2, 130.2, 129.0, 127.7,

126.6, 125.0, 123.8, 123.1, 122.6, 119.8, 119.2, 112.3, 110.6, 51.8, 25.7, 21.6 ppm; HRMS (ESI-TOF)  $m/z$   $[M + H]^+$  calcd for  $C_{26}H_{19}BrN_2S^+$  471.0525, found 471.0525.

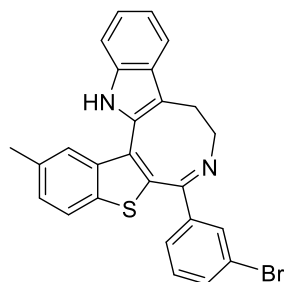

**(Z)-6-(3-bromophenyl)-2-methyl-9,14-dihydro-8H-benzo[4',5']thieno[3',2':6,7]azocino[5,4-b]indole (5e).**

The residue was purified by column chromatography (ethyl acetate/petroleum ether = 1:5) as a yellow solid: 110 mg (yield 78%); mp 169-171 °C; IR (KBr) 3386, 3152, 3061, 2865, 2351, 1645, 1462, 1314, 1209, 1063, 880, 790, 731, 638  $cm^{-1}$ ;  $^1H$  NMR (400 MHz,  $CDCl_3$ )  $\delta$  8.15 (s, 1H), 7.87 – 7.80 (m, 2H), 7.80 (d,  $J = 8.4$  Hz, 1H), 7.61 (d,  $J = 8.0$  Hz, 2H), 7.49 (d,  $J = 8.8$  Hz, 1H), 7.40 (d,  $J = 8.0$  Hz, 1H), 7.37 – 7.29 (m, 1H), 7.24 (d,  $J = 1.2$  Hz, 1H), 7.23 – 7.11 (m, 2H), 4.40 – 4.30 (m, 1H), 4.33 – 4.22 (m, 1H), 3.72 – 3.60 (m, 1H), 3.31 (dt,  $J = 16.8, 2.8$  Hz, 1H), 2.51 (s, 3H) ppm;  $^{13}C\{^1H\}$  NMR (100 MHz,  $CDCl_3$ )  $\delta$  162.9, 141.1, 138.1, 137.8, 135.8, 135.4, 133.2, 132.6, 131.5, 130.4, 129.5, 129.0, 127.7, 127.2, 126.6, 123.8, 123.1, 122.6, 122.4, 119.8, 119.2, 112.3, 110.6, 51.8, 25.7, 21.6 ppm; HRMS (ESI-TOF)  $m/z$   $[M + H]^+$  calcd for  $C_{26}H_{19}BrN_2S^+$  471.0525, found 471.0525.

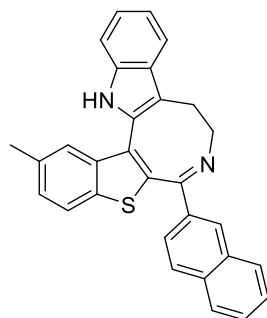

**(Z)-2-methyl-6-(naphthalen-2-yl)-9,14-dihydro-8H-benzo[4',5']thieno[3',2':6,7]azocino[5,4-b]indole (5f).**

The residue was purified by column chromatography (ethyl acetate/petroleum ether = 1:5) as a yellow solid: 105 mg (yield 79%); mp 232-234 °C; IR (KBr) 3343, 3238, 3147, 2926, 2339, 1687, 1524, 1459, 1253, 1190, 1011, 795, 735, 668, 585  $cm^{-1}$ ;  $^1H$  NMR (400 MHz,  $CDCl_3$ )  $\delta$  8.16 (s, 1H), 8.03 (s, 1H), 7.94 (dd,  $J = 8.8, 2.0$  Hz, 1H), 7.88 (s, 1H), 7.84 – 7.78 (m, 3H), 7.75 (d,  $J = 8.0$  Hz, 1H), 7.61 (d,  $J = 8.0$  Hz, 1H), 7.51 – 7.38 (m, 3H), 7.34 (dd,  $J = 8.4, 1.2$  Hz, 1H), 7.25 – 7.21 (m, 1H), 7.17 – 7.12 (m, 1H), 4.45 – 4.38 (m, 1H), 4.37 – 4.29 (m, 1H), 3.76 – 3.63 (m, 1H), 3.33 (dt,  $J = 16.8, 2.8$  Hz, 1H), 2.53 (s, 3H) ppm;  $^{13}C\{^1H\}$  NMR (100 MHz,  $CDCl_3$ )  $\delta$  164.1, 138.3, 137.9, 136.6, 135.9, 135.3, 134.4, 133.6, 132.7, 130.1, 129.7, 129.1, 128.8, 127.8, 127.6, 127.6, 127.1, 126.8, 126.2, 125.1, 123.8, 123.0, 122.6, 119.7, 119.2, 112.4, 110.6, 51.8, 25.8, 21.6 ppm; HRMS (ESI-TOF)  $m/z$   $[M + H]^+$  calcd for  $C_{30}H_{22}N_2S^+$  443.1576, found 443.1577.

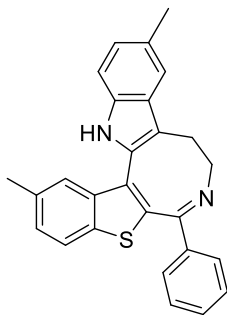

**(Z)-2,11-dimethyl-6-phenyl-9,14-dihydro-8H-benzo[4',5']thieno[3',2':6,7]azocino[5,4-b]indole (5g).**

The residue was purified by column chromatography (ethyl acetate/petroleum ether = 1:5) as a yellow solid: 96 mg (yield 79%); mp 226-228 °C; IR (KBr) 3341, 3218, 2927, 2327, 1699, 1591, 1458, 1377, 1265, 1084, 861, 791, 724, 597  $\text{cm}^{-1}$ ;  $^1\text{H}$  NMR (400 MHz,  $\text{CDCl}_3$ )  $\delta$  8.01 (s, 1H), 7.83 (s, 1H), 7.78 (d,  $J = 8.4$  Hz, 1H), 7.70 – 7.63 (m, 2H), 7.41 – 7.32 (m, 2H), 7.35 – 7.26 (m, 3H), 7.27 (s, 1H), 7.07 (dd,  $J = 8.4, 1.2$  Hz, 1H), 4.37 – 4.21 (m, 2H), 3.69 – 3.56 (m, 1H), 3.27 (dt,  $J = 16.8, 2.8$  Hz, 1H), 2.50 (s, 3H), 2.46 (s, 3H) ppm;  $^{13}\text{C}\{^1\text{H}\}$  NMR (100 MHz,  $\text{CDCl}_3$ )  $\delta$  164.1, 139.2, 138.2, 137.8, 135.2, 134.1, 133.4, 130.3, 130.1, 129.3, 129.0, 128.6, 128.0, 127.5, 126.9, 124.5, 123.8, 122.5, 118.8, 111.9, 110.2, 51.7, 25.8, 21.6, 21.5 ppm; HRMS (ESI-TOF)  $m/z$   $[\text{M} + \text{H}]^+$  calcd for  $\text{C}_{27}\text{H}_{22}\text{N}_2\text{S}^+$  407.1576, found 407.1581.

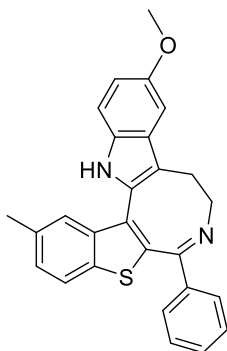

**(Z)-11-methoxy-2-methyl-6-phenyl-9,14-dihydro-8H-benzo[4',5']thieno[3',2':6,7]azocino[5,4-b]indole (5h).**

The residue was purified by column chromatography (ethyl acetate/petroleum ether = 1:5) as a yellow solid: 103 mg (yield 81%); mp 231-233 °C; IR (KBr) 3323, 3237, 3035, 2895, 2356, 1869, 1487, 1216, 1087, 964, 808, 667, 597  $\text{cm}^{-1}$ ;  $^1\text{H}$  NMR (400 MHz,  $\text{CDCl}_3$ )  $\delta$  8.01 (s, 1H), 7.84 (s, 1H), 7.78 (d,  $J = 8.4$  Hz, 1H), 7.71 – 7.63 (m, 2H), 7.39 – 7.32 (m, 1H), 7.35 – 7.24 (m, 4H), 7.01 (d,  $J = 2.4$  Hz, 1H), 6.90 (dd,  $J = 8.4, 2.4$  Hz, 1H), 4.38 – 4.21 (m, 2H), 3.87 (s, 3H), 3.68 – 3.54 (m, 1H), 3.26 (dt,  $J = 16.8, 2.8$  Hz, 1H), 2.50 (s, 3H) ppm;  $^{13}\text{C}\{^1\text{H}\}$  NMR (100 MHz,  $\text{CDCl}_3$ )  $\delta$  164.2, 154.2, 139.2, 138.2, 137.8, 135.2, 133.4, 131.0, 130.4, 130.0, 129.5, 128.6, 128.0, 127.6, 127.5, 123.8, 122.5, 113.3, 112.0, 111.4, 100.9, 56.0, 51.6, 25.9, 21.6 ppm; HRMS (ESI-TOF)  $m/z$   $[\text{M} + \text{H}]^+$  calcd for  $\text{C}_{27}\text{H}_{22}\text{N}_2\text{OS}^+$  423.1526, found 423.1530.

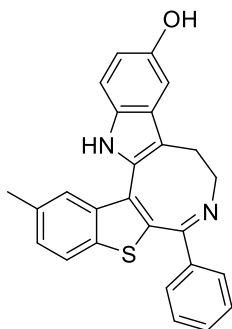

**(Z)-2-methyl-6-phenyl-9,14-dihydro-8H-benzo[4',5']thieno[3',2':6,7]azocino[5,4-b]indol-11-ol (5i).**

The residue was purified by column chromatography (ethyl acetate/petroleum ether = 1:1) as a brown solid: 80 mg (yield 65%); mp 262-264 °C; IR (KBr) 3344, 3281, 2925, 2632, 2357, 1699, 1559, 1459, 1238, 1085, 881, 792, 667, 596  $\text{cm}^{-1}$ ;  $^1\text{H}$  NMR (400 MHz, DMSO)  $\delta$  10.95 (s, 1H), 8.75 (s, 1H), 7.98 (d,  $J = 8.0$  Hz, 1H), 7.77 (s, 1H), 7.65 – 7.58 (m, 2H), 7.46 – 7.34 (m, 5H), 7.15 (d,  $J = 8.8$  Hz, 1H), 6.80 (d,  $J = 2.4$  Hz, 1H), 6.66 (dd,  $J = 8.8, 2.4$  Hz, 1H), 4.28 – 4.19 (m, 1H), 4.02 (td,  $J = 12.8, 2.8$  Hz, 1H), 3.30 (dd,  $J = 13.2, 4.4$  Hz, 1H), 3.17 – 3.08 (m, 1H), 2.46 (s, 3H) ppm;  $^{13}\text{C}\{^1\text{H}\}$  NMR (100 MHz, DMSO)  $\delta$  150.6, 138.4, 138.0, 136.8, 134.7, 131.5, 130.8, 130.7, 130.6, 129.0, 128.8, 128.3, 128.0, 127.5, 127.0, 124.5, 122.6, 112.6, 111.7, 109.1, 102.2, 51.2, 25.5, 21.2 ppm; HRMS (ESI-TOF)  $m/z$  [ $\text{M} + \text{H}$ ] $^+$  calcd for  $\text{C}_{26}\text{H}_{20}\text{N}_2\text{OS}^+$  409.1369, found 409.1374.

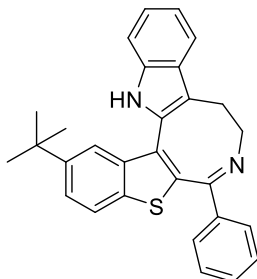

**(Z)-2-(tert-butyl)-6-phenyl-9,14-dihydro-8H-benzo[4',5']thieno[3',2':6,7]azocino[5,4-b]indole (5j).**

The residue was purified by column chromatography (ethyl acetate/petroleum ether = 1:5) as a yellow solid: 109 mg (yield 84%); mp 107-109 °C; IR (KBr) 3380, 3148, 2926, 2358, 1689, 1576, 1447, 1277, 1206, 967, 857, 745, 652  $\text{cm}^{-1}$ ;  $^1\text{H}$  NMR (400 MHz,  $\text{CDCl}_3$ )  $\delta$  8.14 (s, 1H), 8.02 (d,  $J = 1.6$  Hz, 1H), 7.84 (d,  $J = 8.4$  Hz, 1H), 7.68 – 7.64 (m, 2H), 7.62 (d,  $J = 7.6$  Hz, 1H), 7.57 (dd,  $J = 8.4, 1.6$  Hz, 1H), 7.41 – 7.35 (m, 2H), 7.33 – 7.28 (m, 2H), 7.26 – 7.23 (m, 1H), 7.18 – 7.13 (m, 1H), 4.38 – 4.24 (m, 2H), 3.74 – 3.64 (m, 1H), 3.32 (dt,  $J = 16.8, 2.8$  Hz, 1H), 1.40 (s, 9H) ppm;  $^{13}\text{C}\{^1\text{H}\}$  NMR (100 MHz,  $\text{CDCl}_3$ )  $\delta$  164.2, 148.8, 139.2, 137.9, 137.9, 136.0, 133.6, 130.44, 130.35, 129.2, 128.6, 128.0, 126.9, 124.3, 122.9, 122.5, 119.8, 119.7, 119.2, 112.5, 110.6, 51.7, 35.0, 31.6, 25.8 ppm; HRMS (ESI-TOF)  $m/z$  [ $\text{M} + \text{H}$ ] $^+$  calcd for  $\text{C}_{29}\text{H}_{26}\text{N}_2\text{S}^+$  435.1889, found 435.1887.

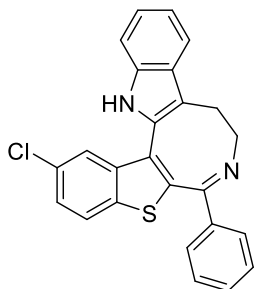

**(Z)-2-chloro-6-phenyl-9,14-dihydro-8H-benzo[4',5']thieno[3',2':6,7]azocino[5,4-b]indole (5k).**

The residue was purified by column chromatography (ethyl acetate/petroleum ether = 1:5) as a yellow solid: 92 mg (yield 74%); mp 260-262 °C; IR (KBr) 3344, 3153, 3080, 2763, 2356, 1590, 1458, 1273, 1081, 989, 804, 741, 674 cm<sup>-1</sup>; <sup>1</sup>H NMR (400 MHz, CDCl<sub>3</sub>) δ 8.08 (s, 1H), 8.04 (d, *J* = 2.0 Hz, 1H), 7.82 (d, *J* = 8.4 Hz, 1H), 7.70 – 7.63 (m, 2H), 7.60 (d, *J* = 8.0 Hz, 1H), 7.44 (dd, *J* = 8.4, 2.0 Hz, 1H), 7.42 – 7.36 (m, 2H), 7.35 – 7.30 (m, 2H), 7.24 (d, *J* = 1.2 Hz, 1H), 7.20 – 7.11 (m, 1H), 4.37 (dt, *J* = 9.6, 4.0 Hz, 1H), 4.30 – 4.19 (m, 1H), 3.74 – 3.61 (m, 1H), 3.31 (dt, *J* = 16.8, 2.8 Hz, 1H) ppm; <sup>13</sup>C{<sup>1</sup>H} NMR (100 MHz, CDCl<sub>3</sub>) δ 163.5, 139.1, 138.9, 138.6, 136.0, 135.1, 131.7, 130.6, 129.7, 129.1, 128.6, 128.1, 126.3, 125.9, 123.9, 123.6, 123.3, 119.9, 119.3, 112.9, 110.8, 51.7, 25.7 ppm; HRMS (ESI-TOF) *m/z* [M + H]<sup>+</sup> calcd for C<sub>25</sub>H<sub>17</sub>ClN<sub>2</sub>S<sup>+</sup> 413.0874, found 413.0876.

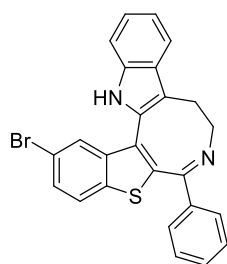

**(Z)-2-bromo-6-phenyl-9,14-dihydro-8H-benzo[4',5']thieno[3',2':6,7]azocino[5,4-b]indole (5l).**

The residue was purified by column chromatography (ethyl acetate/petroleum ether = 1:5) as a yellow solid: 106 mg (yield 77%); mp 246-248 °C; IR (KBr) 3344, 3148, 3059, 2822, 2358, 1698, 1576, 1458, 1207, 965, 844, 739, 667 cm<sup>-1</sup>; <sup>1</sup>H NMR (400 MHz, DMSO) δ 11.34 (s, 1H), 8.13 (d, *J* = 8.4 Hz, 1H), 8.07 (d, *J* = 2.0 Hz, 1H), 7.72 (dd, *J* = 8.4, 2.0 Hz, 1H), 7.64 – 7.57 (m, 2H), 7.54 (d, *J* = 8.0 Hz, 1H), 7.48 – 7.40 (m, 1H), 7.44 – 7.35 (m, 3H), 7.21 – 7.12 (m, 1H), 7.09 – 7.00 (m, 1H), 4.32 – 4.23 (m, 1H), 4.09 – 3.98 (m, 1H), 3.52 – 3.42 (m, 1H), 3.27 – 3.18 (m, 1H) ppm; <sup>13</sup>C{<sup>1</sup>H} NMR (100 MHz, DMSO) δ 162.5, 139.3, 138.5, 138.1, 136.3, 133.7, 130.8, 130.0, 128.7, 128.4, 128.3, 128.0, 126.8, 125.8, 125.1, 122.5, 119.0, 118.6, 118.6, 111.3, 110.7, 51.2, 25.4 ppm; HRMS (ESI-TOF) *m/z* [M + H]<sup>+</sup> calcd for C<sub>25</sub>H<sub>17</sub>BrN<sub>2</sub>S<sup>+</sup> 457.0369, found 457.0368.

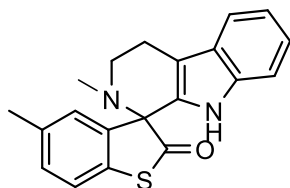

**2',5-dimethyl-2',3',4',9'-tetrahydro-2H-spiro[benzo[b]thiophene-3,1'-pyrido[3,4-b]indol]-2-one (6).**

The residue was purified by column chromatography (ethyl acetate/petroleum ether = 1:3) as a yellow solid: 83 mg (yield 83%); mp 176-178 °C; IR (KBr) 3367, 2919, 1700, 1451, 1285, 945, 746 cm<sup>-1</sup>; <sup>1</sup>H NMR (400 MHz, CDCl<sub>3</sub>) δ 7.60 – 7.53 (m, 1H), 7.31 (d, *J* = 8.0 Hz, 2H), 7.24 – 7.07 (m, 4H), 7.00 (s, 1H), 3.89 – 3.76 (m, 1H), 3.19 – 3.02 (m, 2H), 2.94 (dd, *J* = 15.6, 4.8 Hz, 1H), 2.40 (s, 3H), 2.27 (s, 3H) ppm; <sup>13</sup>C{<sup>1</sup>H} NMR (100 MHz, CDCl<sub>3</sub>) δ 205.0, 137.4, 137.1, 136.6, 131.3, 131.0, 130.9, 127.7, 126.7, 123.0, 122.6, 119.7, 118.8, 111.0, 110.9, 75.8, 47.9, 38.7, 21.2, 21.1 ppm; HRMS (ESI-TOF) *m/z* [M + H]<sup>+</sup> calcd for C<sub>20</sub>H<sub>19</sub>N<sub>2</sub>OS<sup>+</sup> 335.1213, found 335.1219.

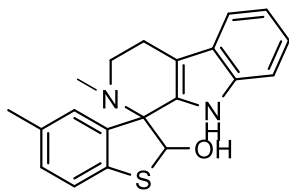

**2',5-dimethyl-2',3',4',9'-tetrahydro-2H-spiro[benzo[b]thiophene-3,1'-pyrido[3,4-b]indol]-2-ol (7).**

The residue was purified by column chromatography (ethyl acetate/petroleum ether = 1:3) as a yellow solid: 74 mg (yield 73%); mp 190-192 °C; IR (KBr) 3369, 2915, 1710, 1468, 1301, 1095, 752 cm<sup>-1</sup>; <sup>1</sup>H NMR (400 MHz, CDCl<sub>3</sub>) δ 7.60 – 7.50 (m, 2H), 7.26 – 7.22 (m, 1H), 7.20 – 7.16 (m, 1H), 7.15 – 7.12 (m, 1H), 7.12 – 7.07 (m, 2H), {6.84, 6.73} (s, 1H), 6.18 (s, 1H), 3.22 – 3.14 (m, 1H), 3.09 – 2.95 (m, 2H), 2.89 – 2.82 (m, 1H), {2.44, 2.36} (s, 3H), 2.21 (s, 3H) ppm; <sup>13</sup>C{<sup>1</sup>H} NMR (100 MHz, CDCl<sub>3</sub>) δ 137.3, 136.7, 136.1, 134.5, 134.1, 131.1, 127.9, 126.1, 122.8, 122.5, 119.7, 118.4, 113.0, 111.1, 87.3, 72.4, 50.8, 39.8, 21.5, 21.0 ppm; HRMS (ESI-TOF) *m/z* [M + H]<sup>+</sup> calcd for C<sub>20</sub>H<sub>21</sub>N<sub>2</sub>OS<sup>+</sup> 337.1369, found 337.1374.

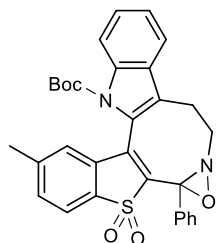

**tert-butyl-2-methyl-5b-phenyl-8,9-dihydrobenzo[4',5']thieno[3',2':6,7][1,2]oxazireno[2',3':1,8]azocin of[5,4-b]indole-14(5bH)-carboxylate 5,5-dioxide (8).** The residue was purified by column chromatography (ethyl acetate/petroleum ether = 1:3) as a yellow solid: 29 mg (yield 54%); mp 190-192 °C; IR (KBr) 3096, 3011, 2840, 2728, 2603, 2352, 2176, 1924, 1717, 1371, 1309, 1158, 810, 654 cm<sup>-1</sup>; <sup>1</sup>H NMR (400 MHz, CDCl<sub>3</sub>) δ 8.30 (d, *J* = 8.4 Hz, 1H), 7.73 (d, *J* = 7.6 Hz, 1H), 7.60 (d, *J* = 8.0 Hz, 1H), 7.57 – 7.43 (m, 3H), 7.42 – 7.32 (m, 2H), 7.33 – 7.24 (m, 1H), 7.27 – 7.18 (m, 2H), 3.99 – 3.89 (m, 1H), 3.76 – 3.65 (m, 1H), 3.47 – 3.39 (m, 1H), 3.17 (dt, *J* = 18.0, 3.2 Hz, 1H), 2.38 (s, 3H), 1.18 (s, 9H) ppm; <sup>13</sup>C NMR (100 MHz, CDCl<sub>3</sub>) δ 149.1, 144.6, 137.5, 136.3, 135.3, 134.0, 132.4, 131.1, 130.9, 129.82, 128.2, 127.3, 126.9, 124.6, 123.6, 122.9, 121.3, 120.6, 119.2, 115.9, 85.6, 81.2, 52.9, 29.7, 27.5, 22.8, 21.7 ppm; HRMS (ESI-TOF) *m/z* [M + H]<sup>+</sup> calcd for C<sub>31</sub>H<sub>29</sub>N<sub>2</sub>O<sub>5</sub>S<sup>+</sup> 541.1792, found 541.1800.



## 8. NMR spectra of all new compounds

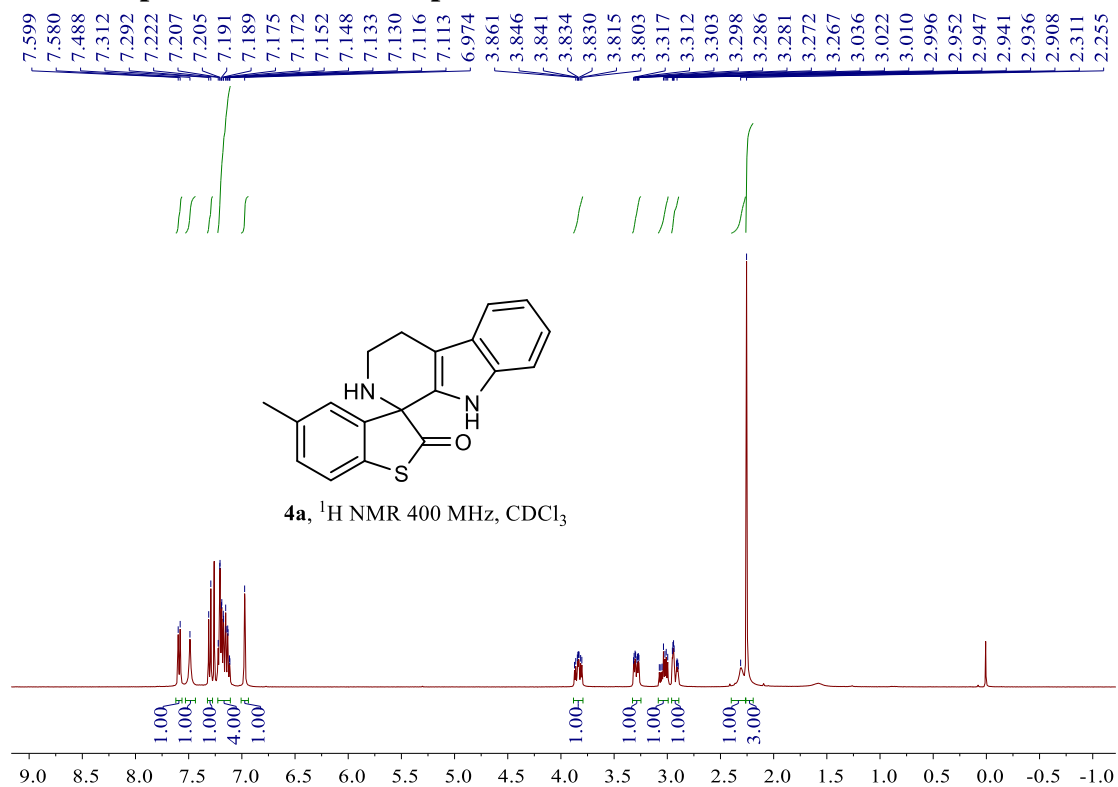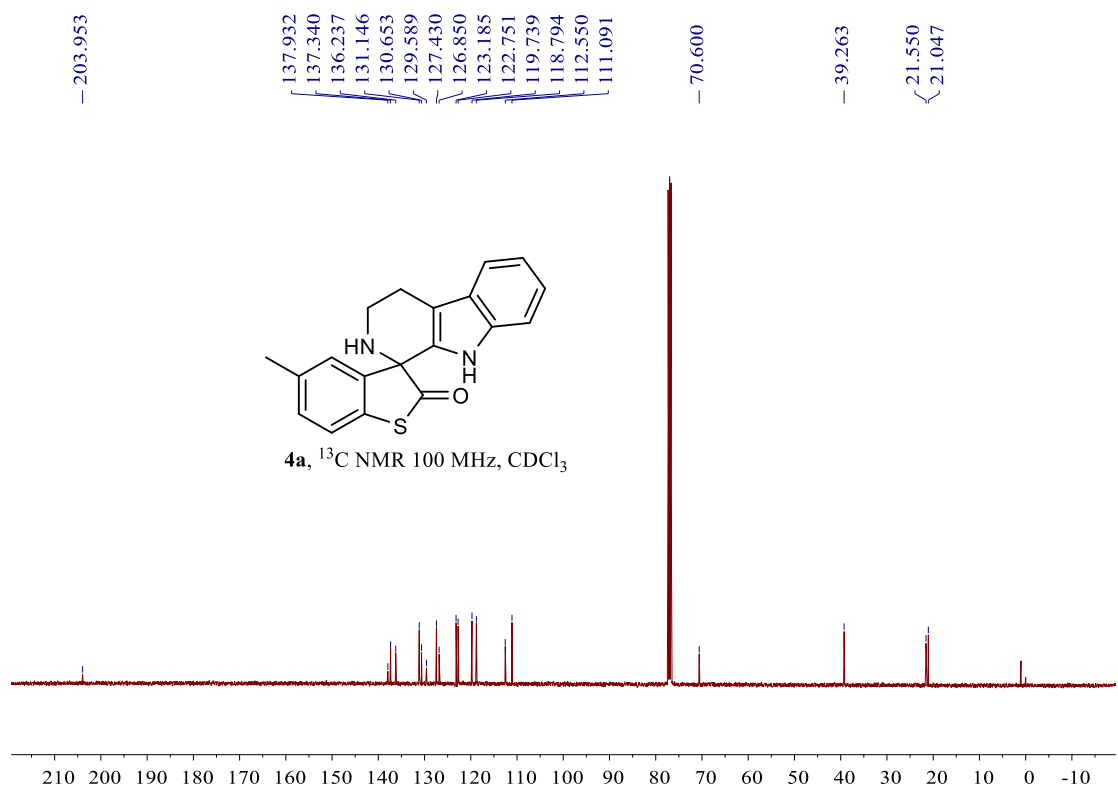

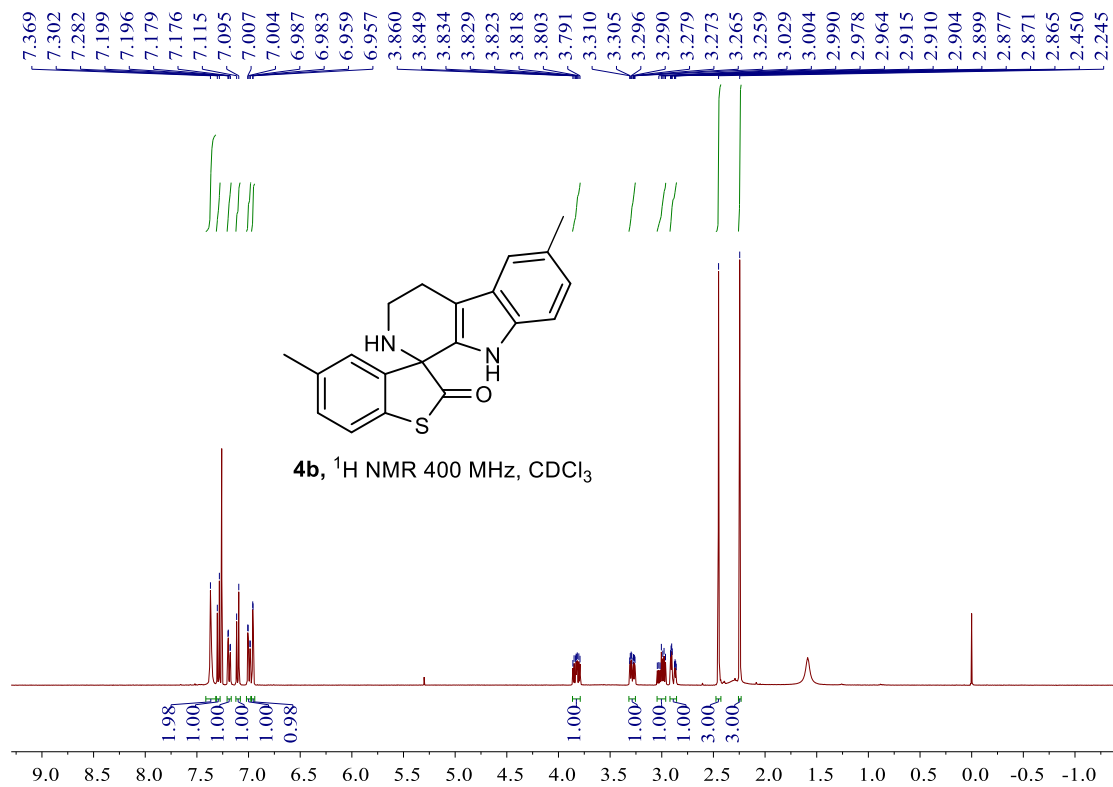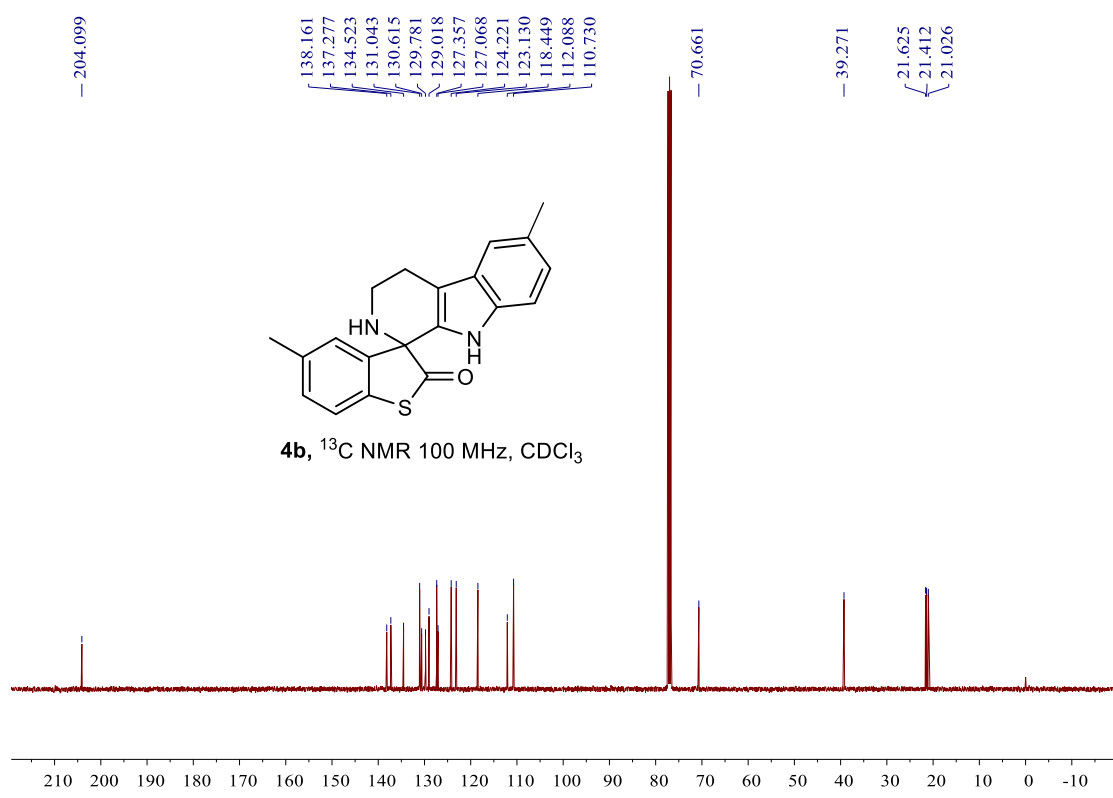

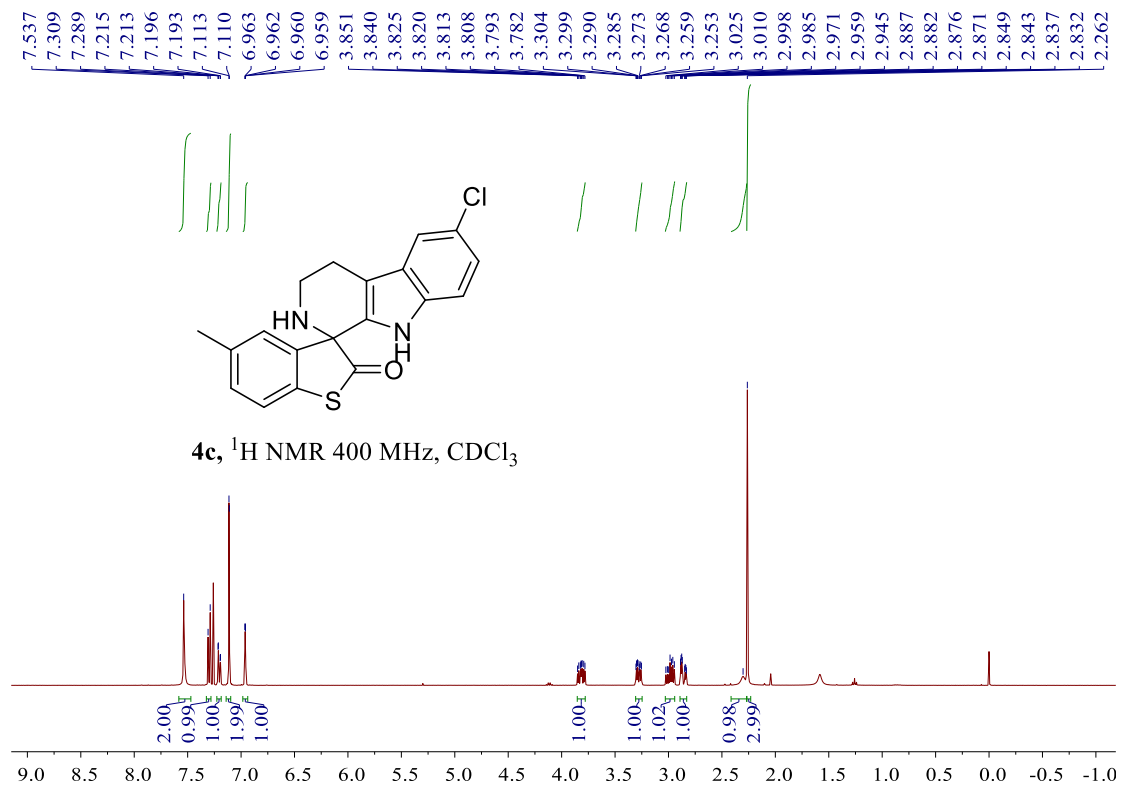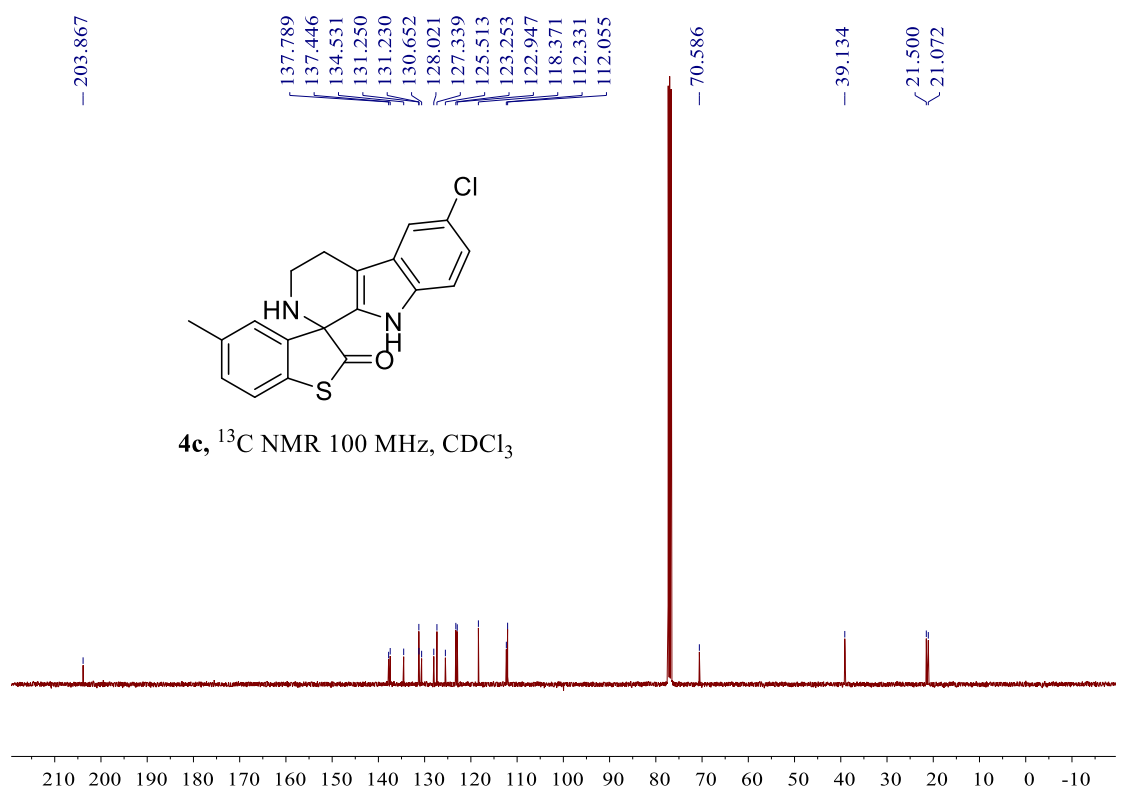

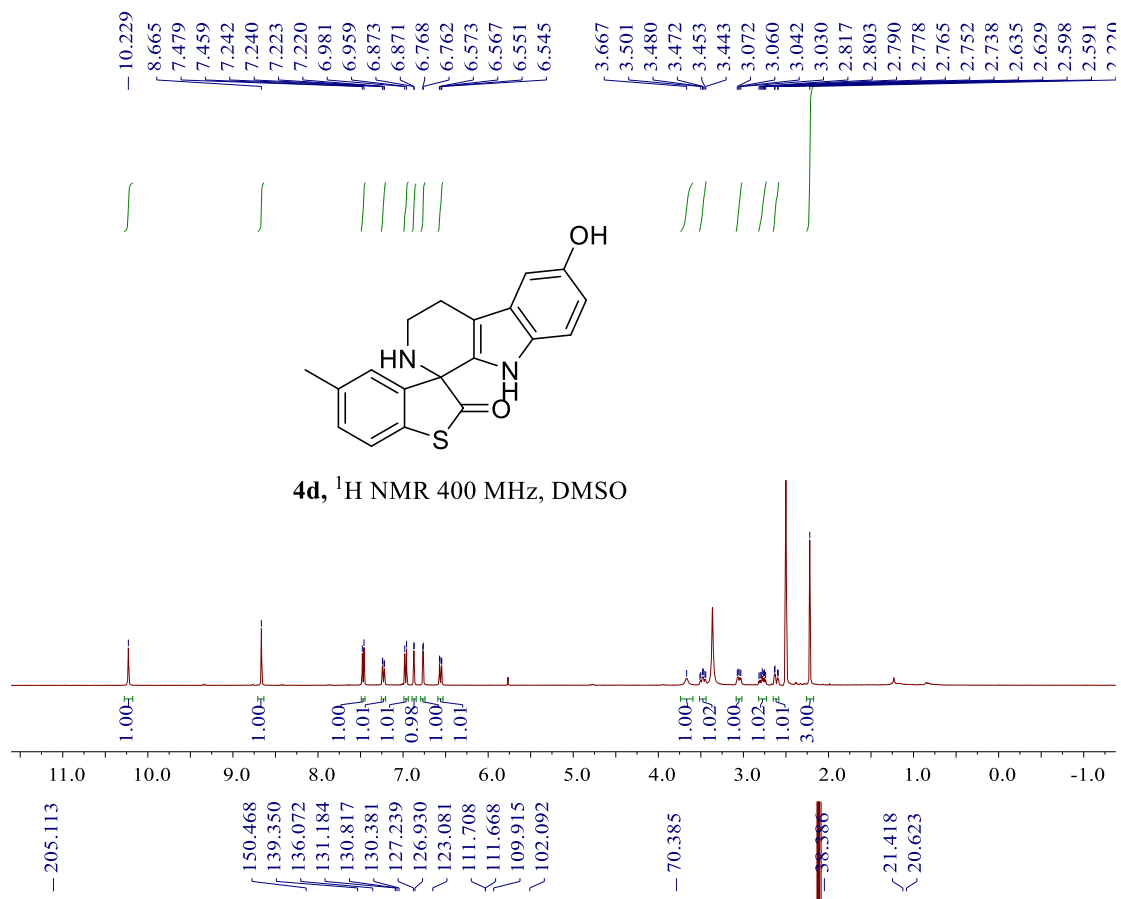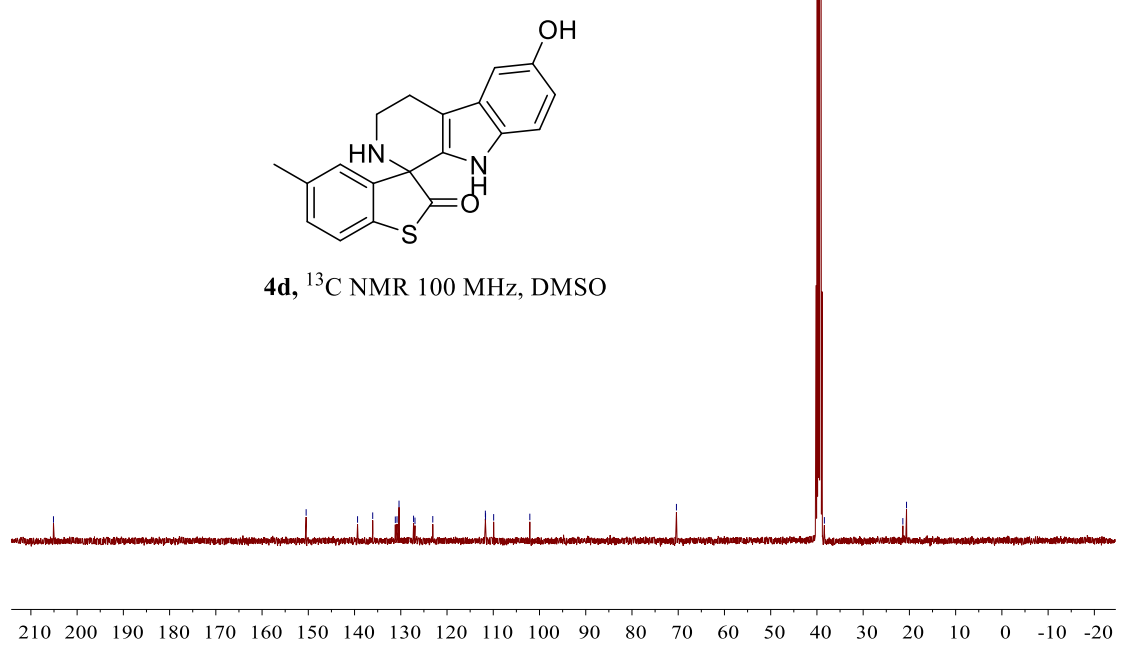

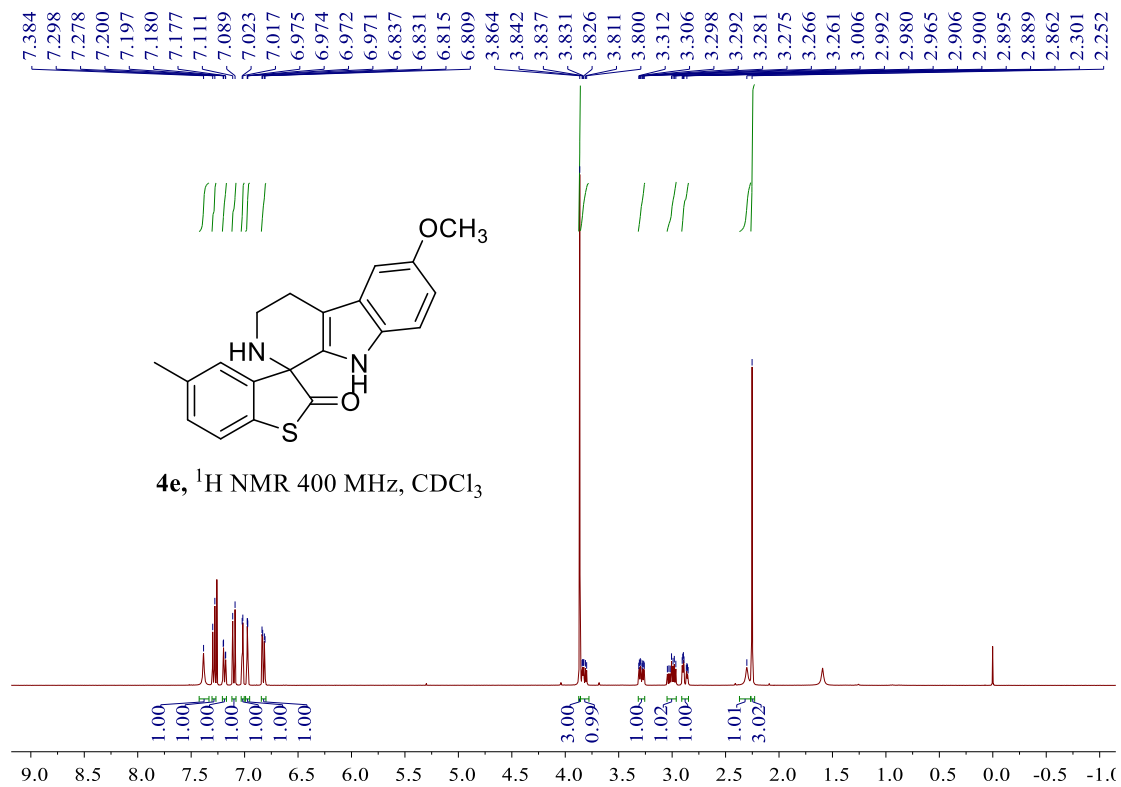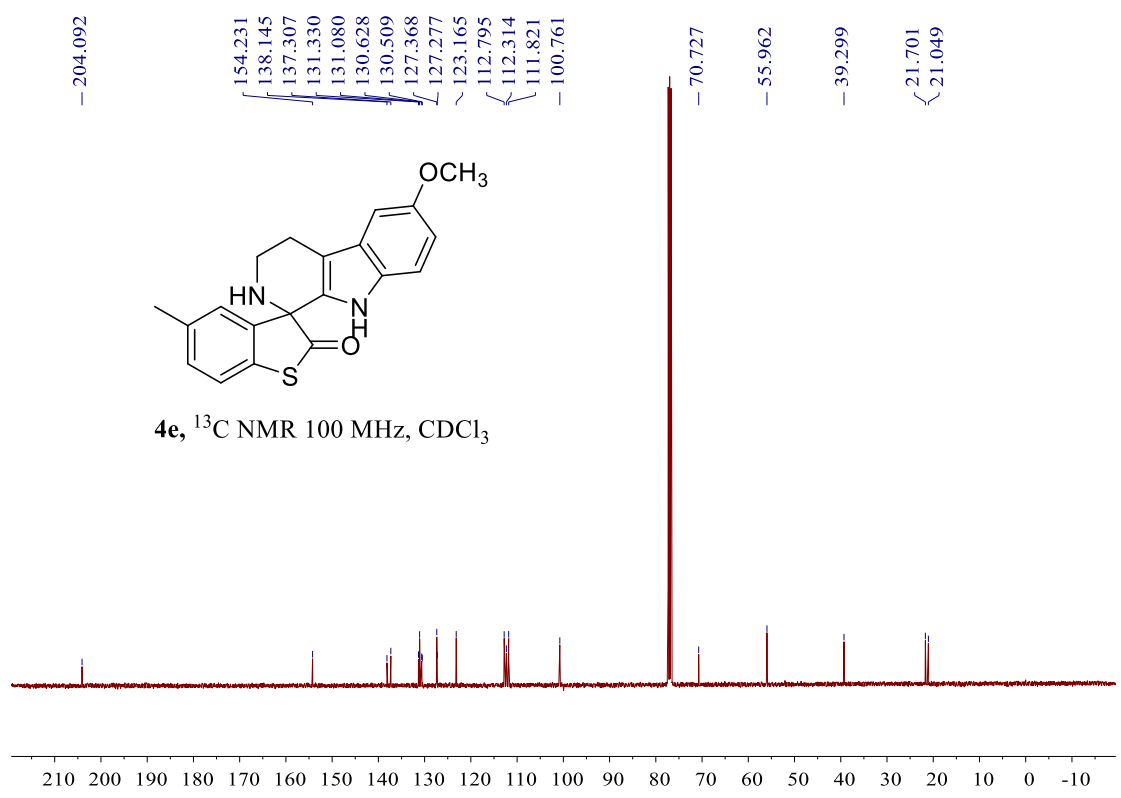

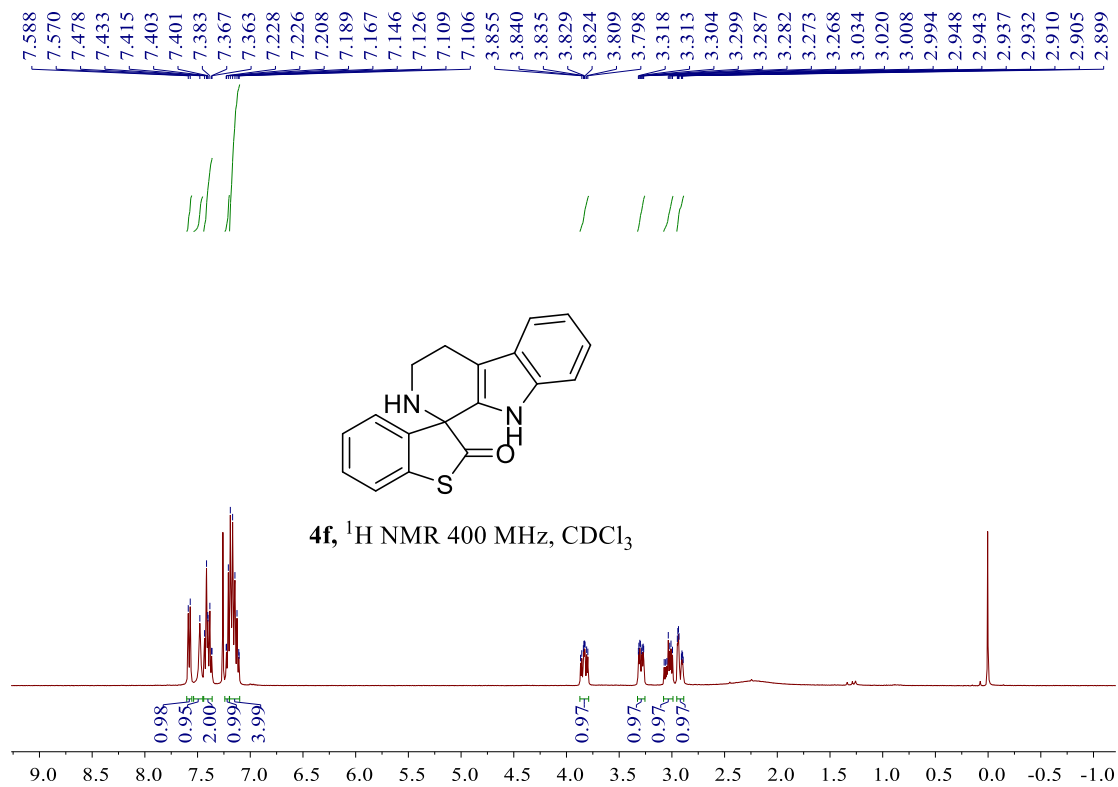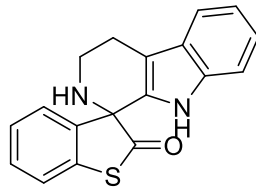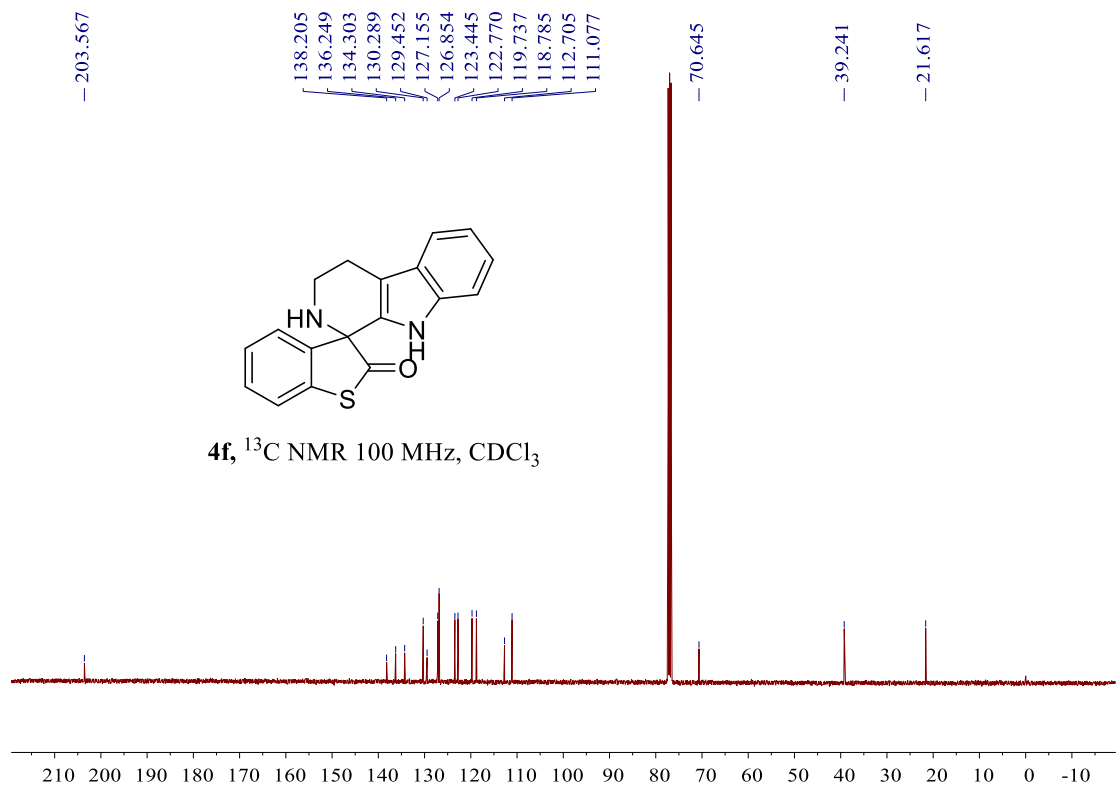

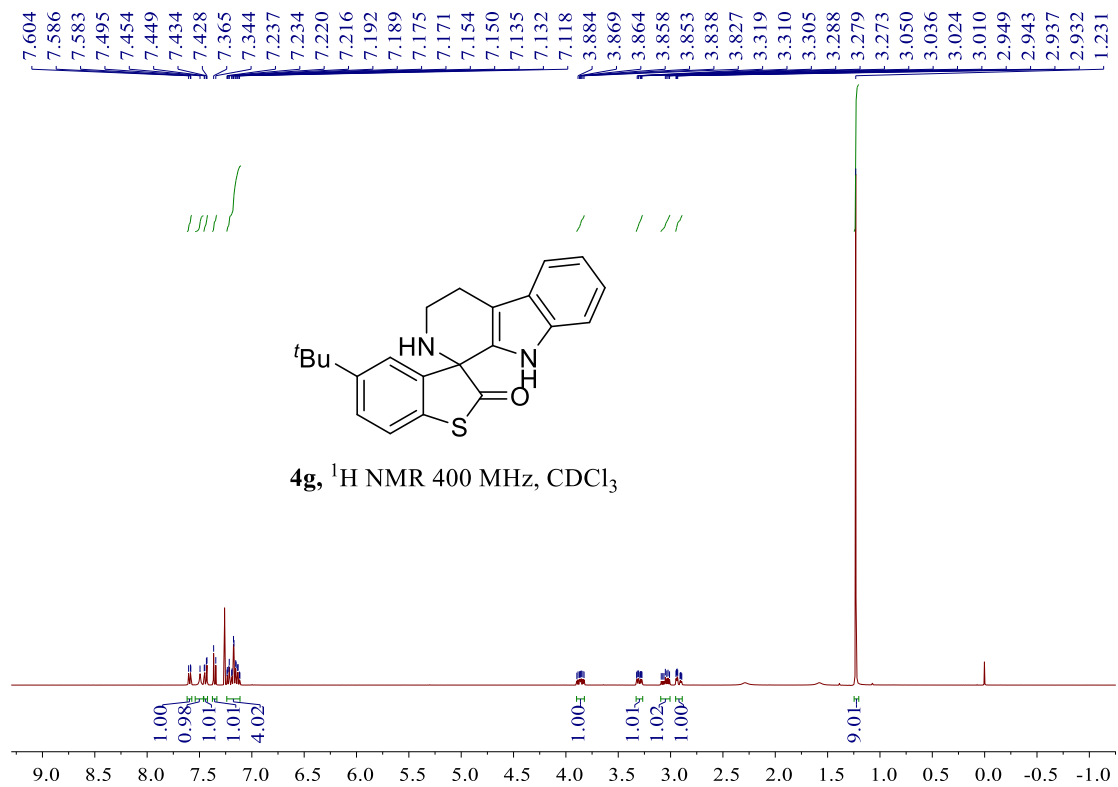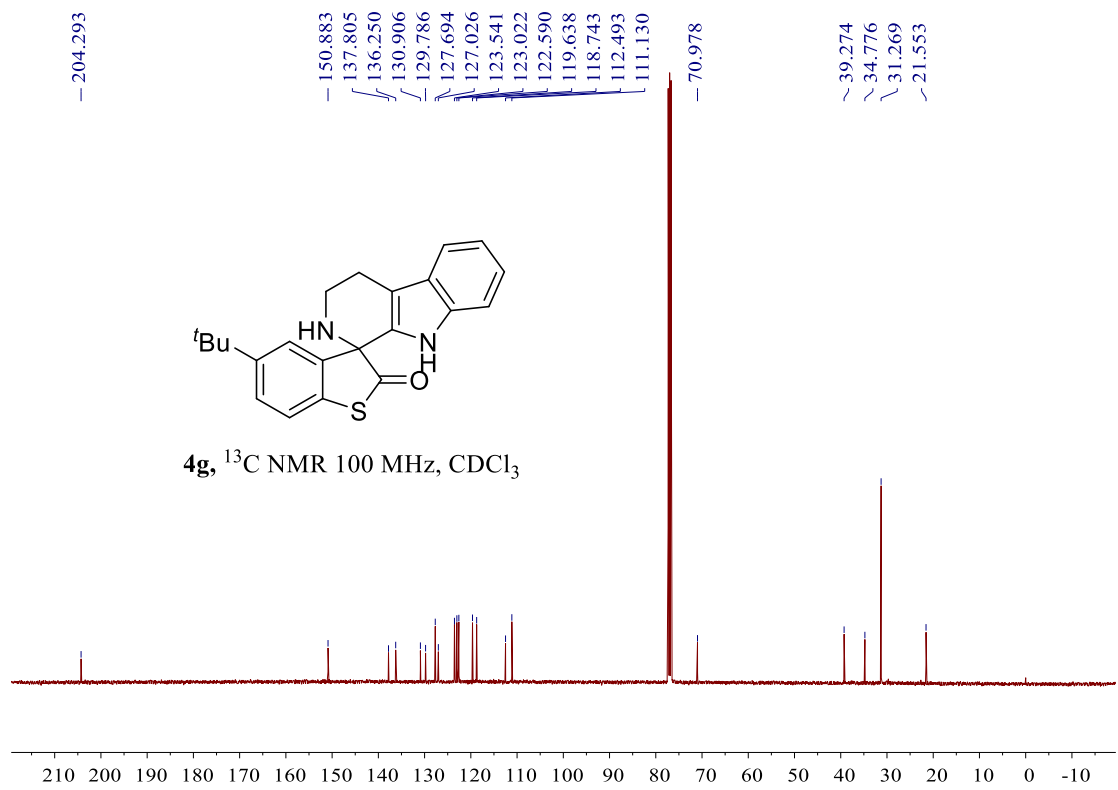

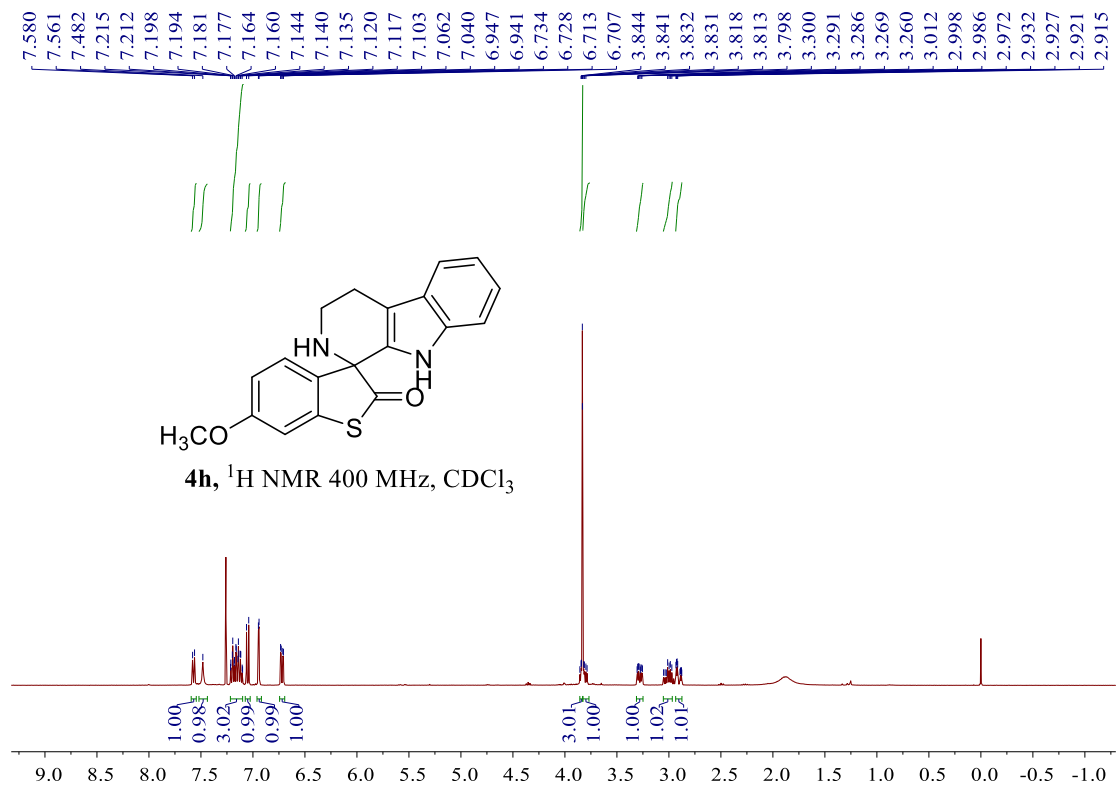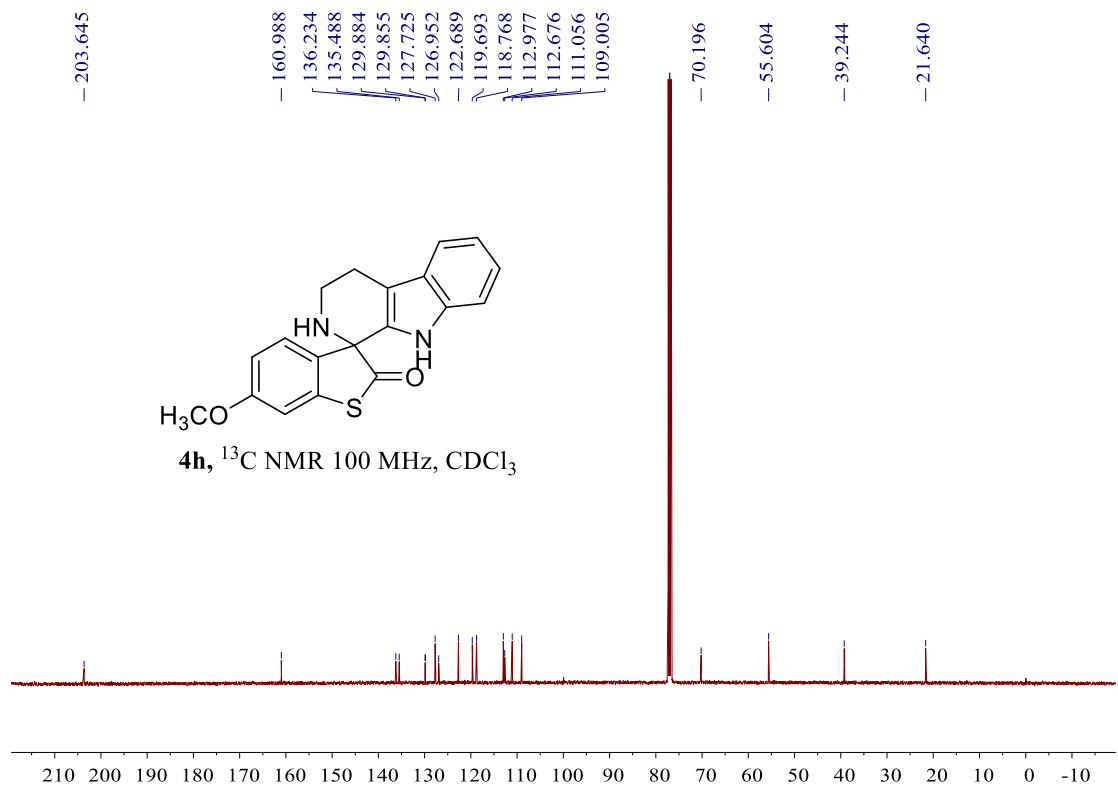



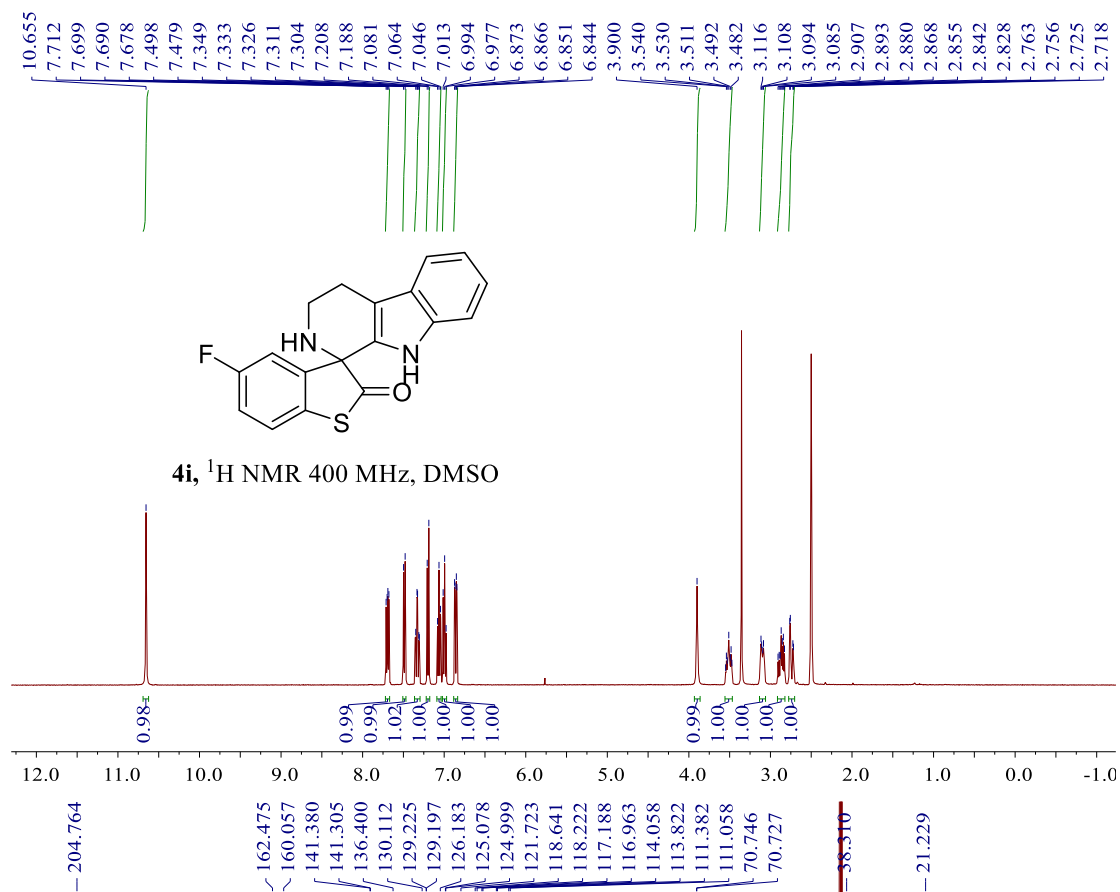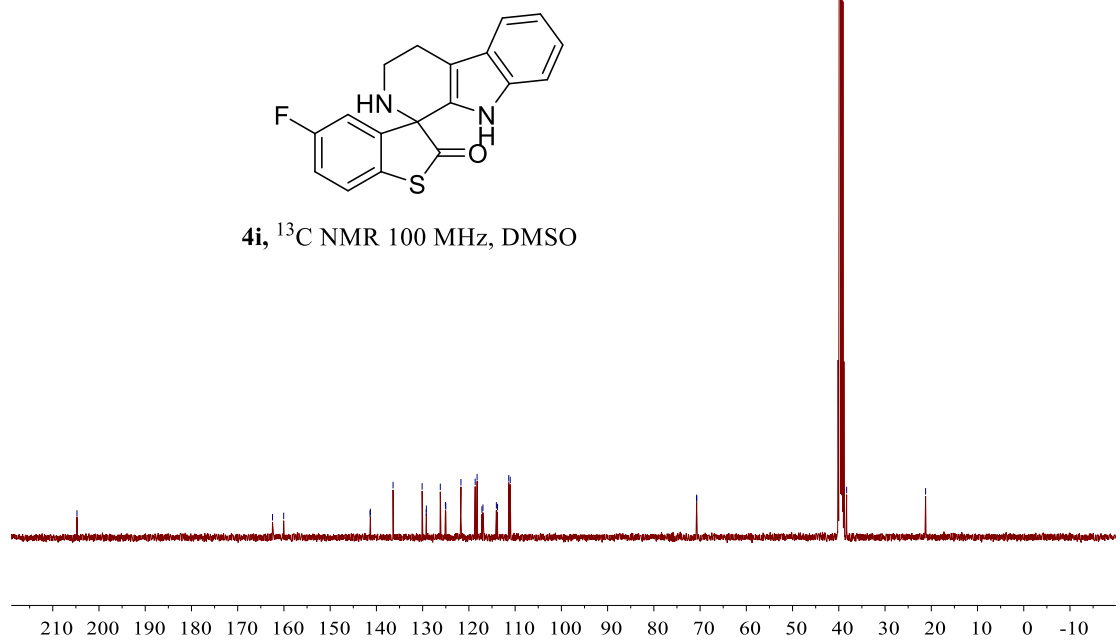

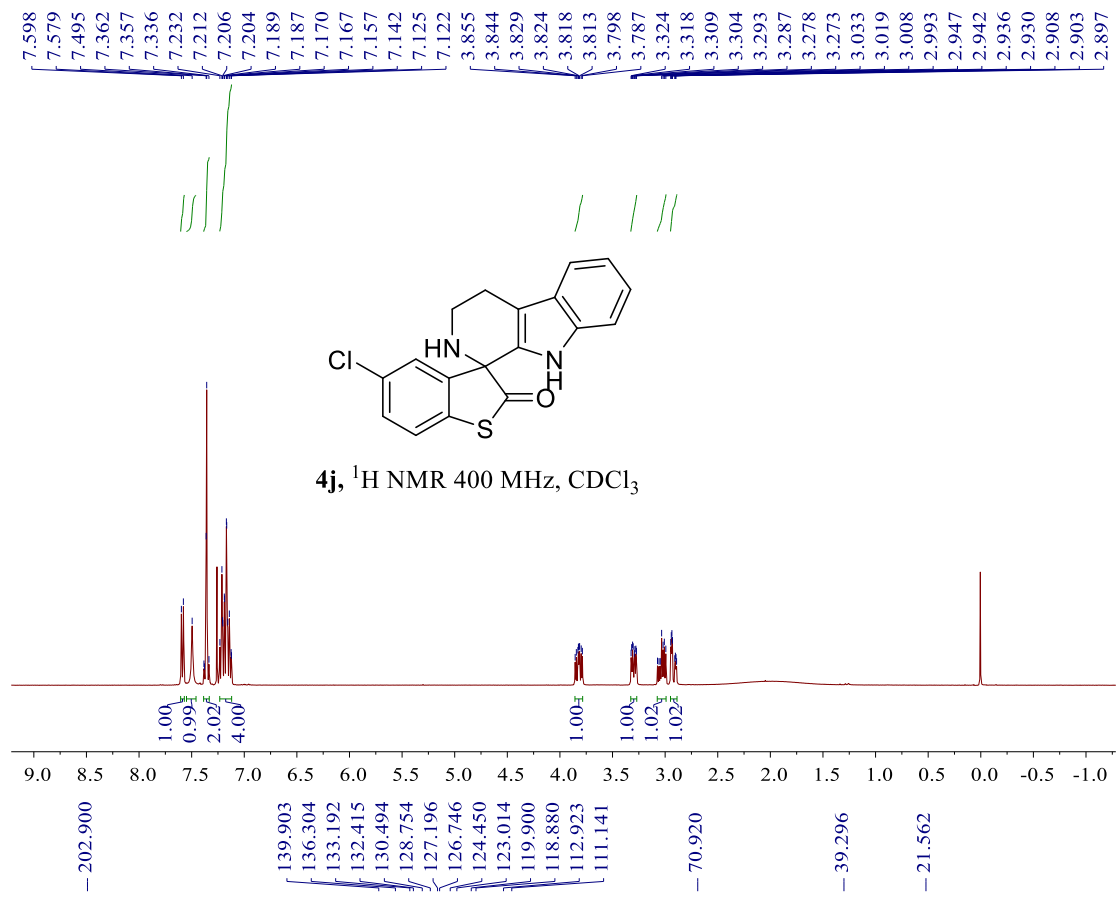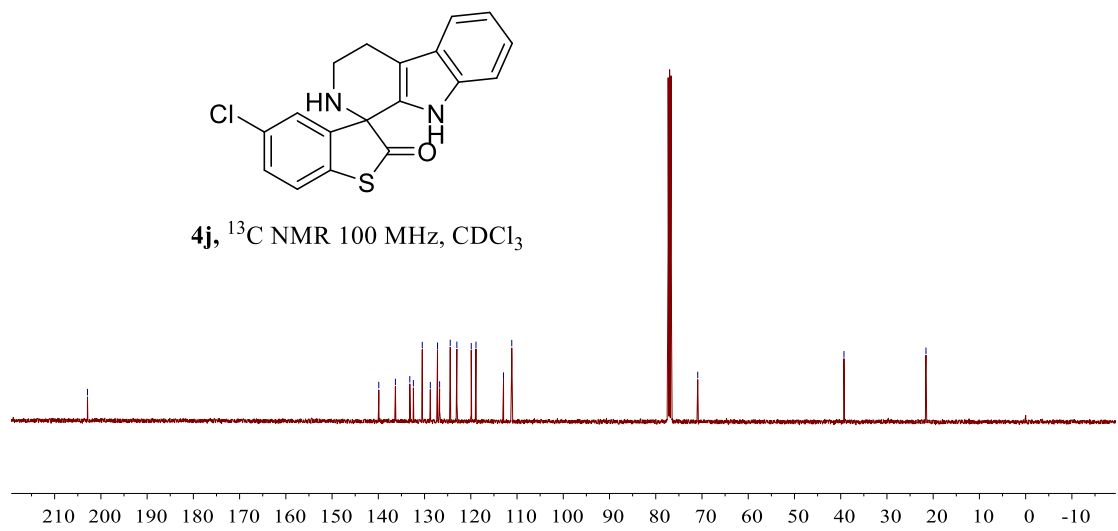

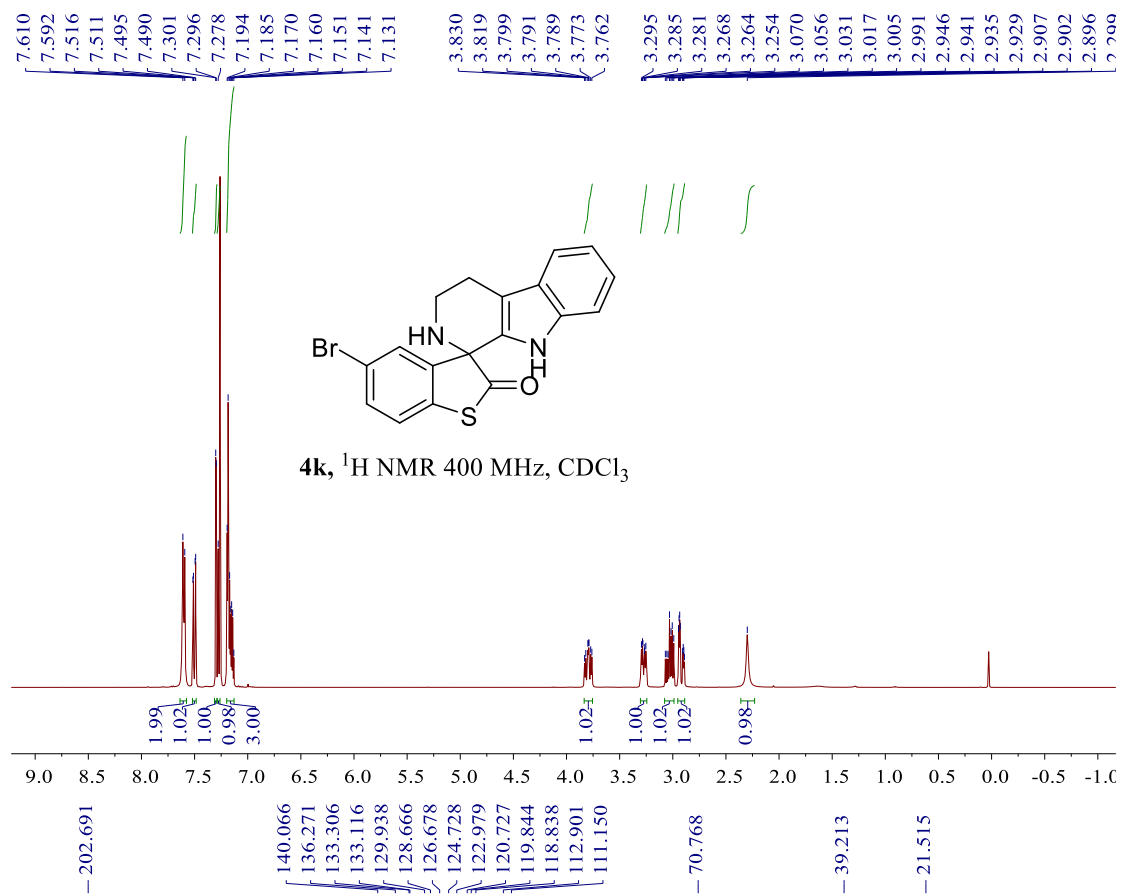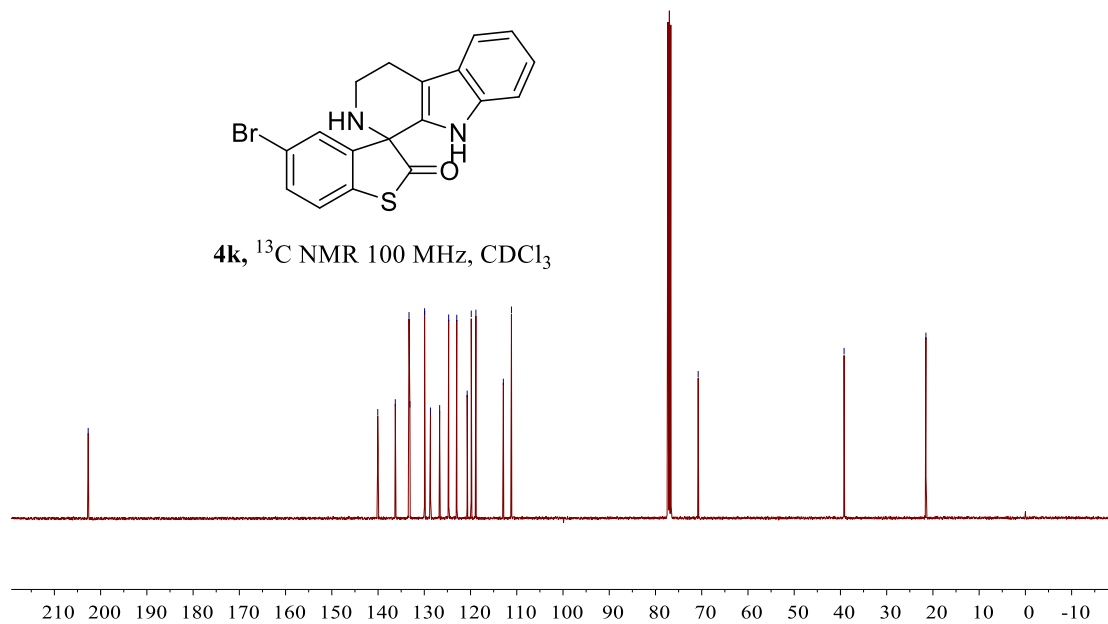

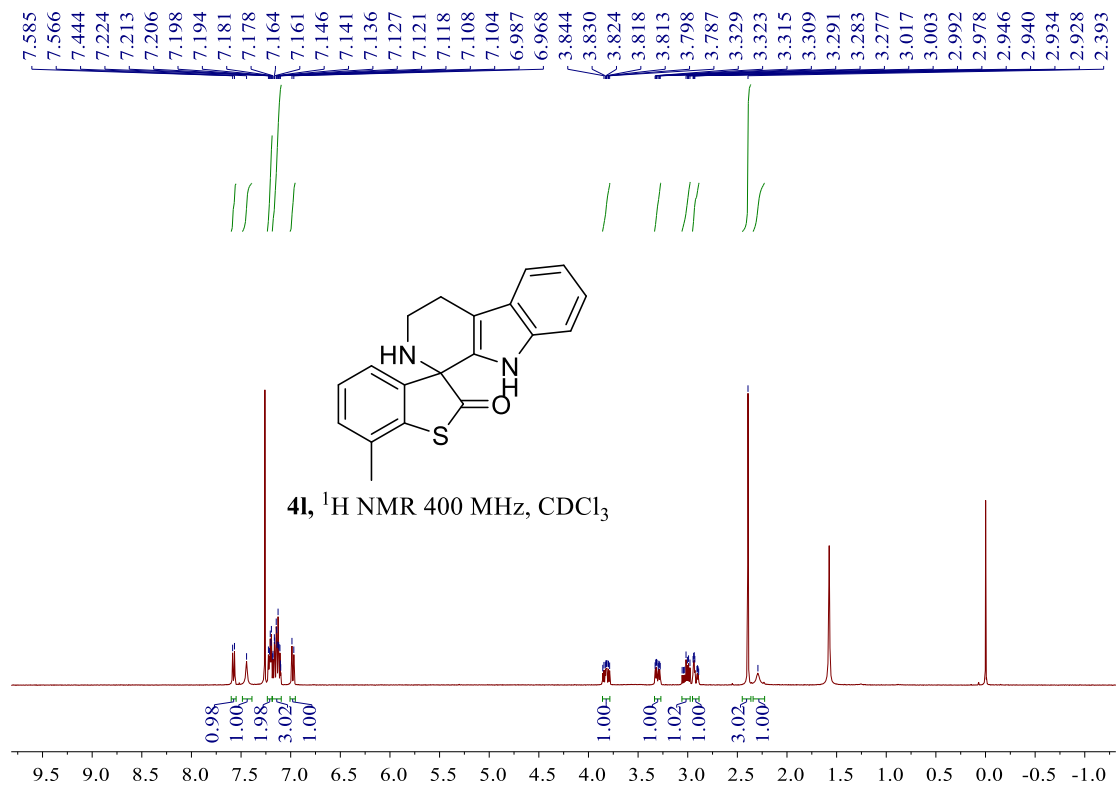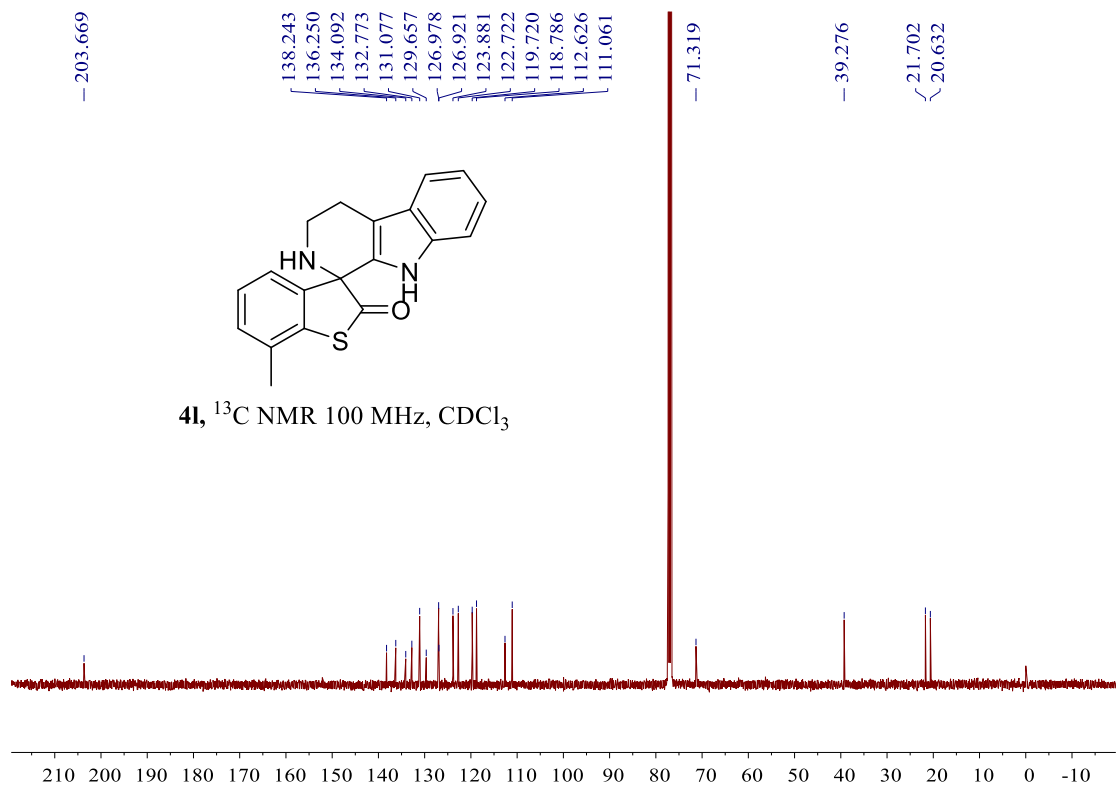

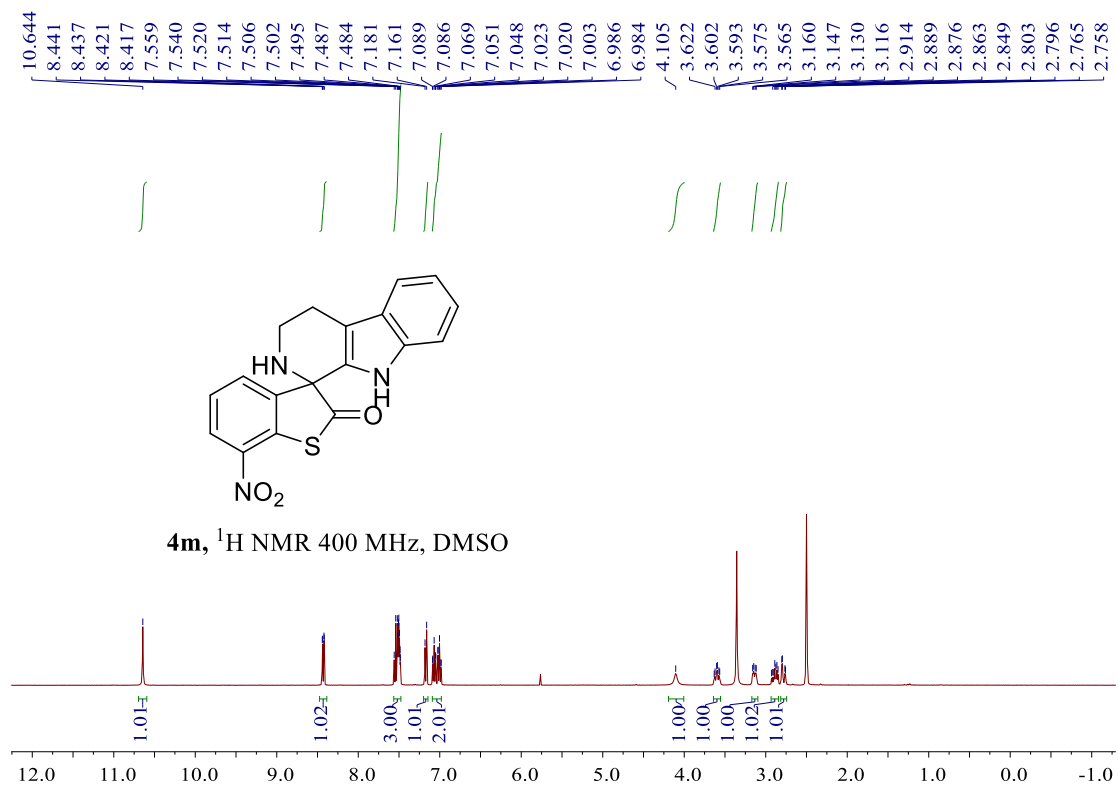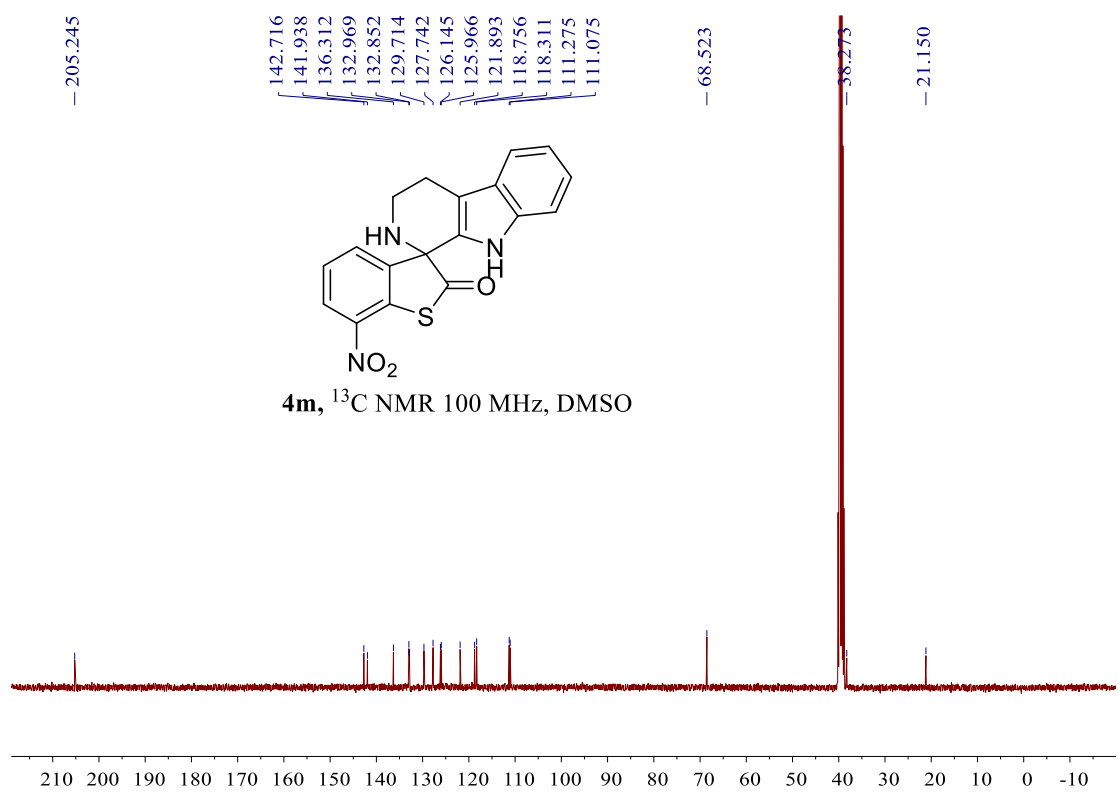

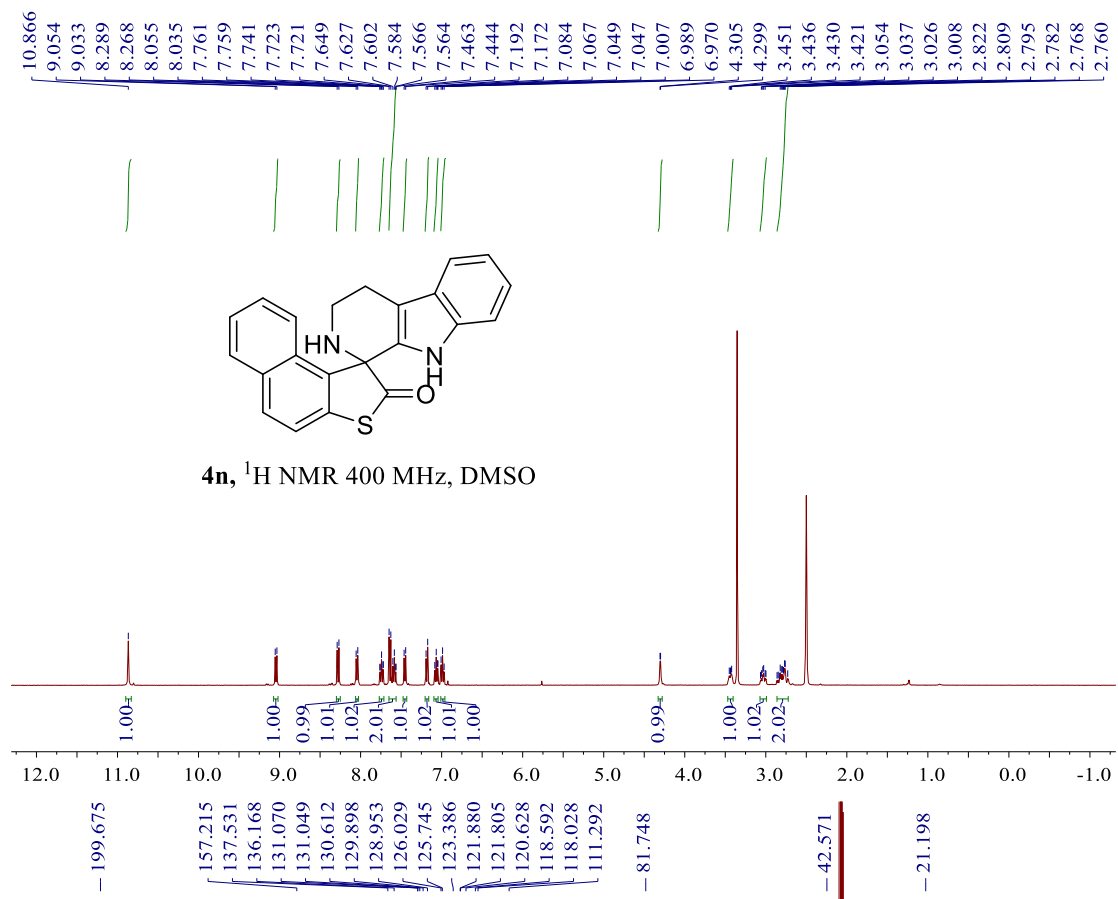

**4n**, <sup>1</sup>H NMR 400 MHz, DMSO

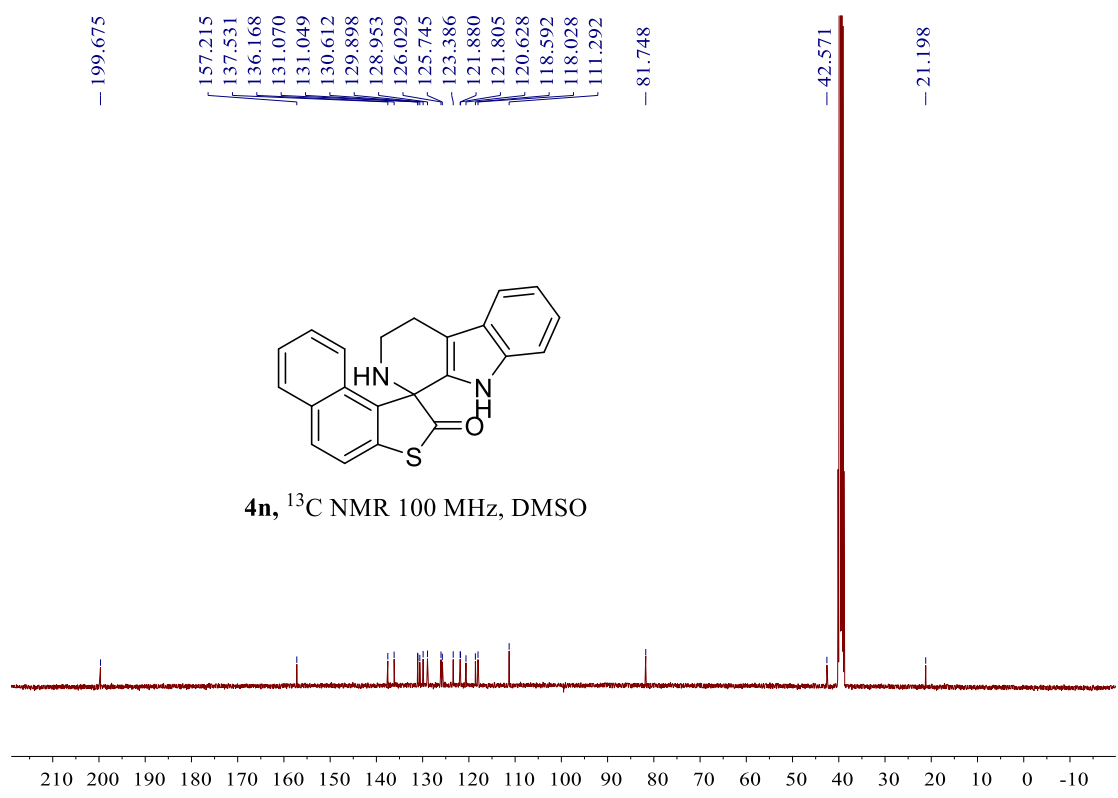

**4n**, <sup>13</sup>C NMR 100 MHz, DMSO

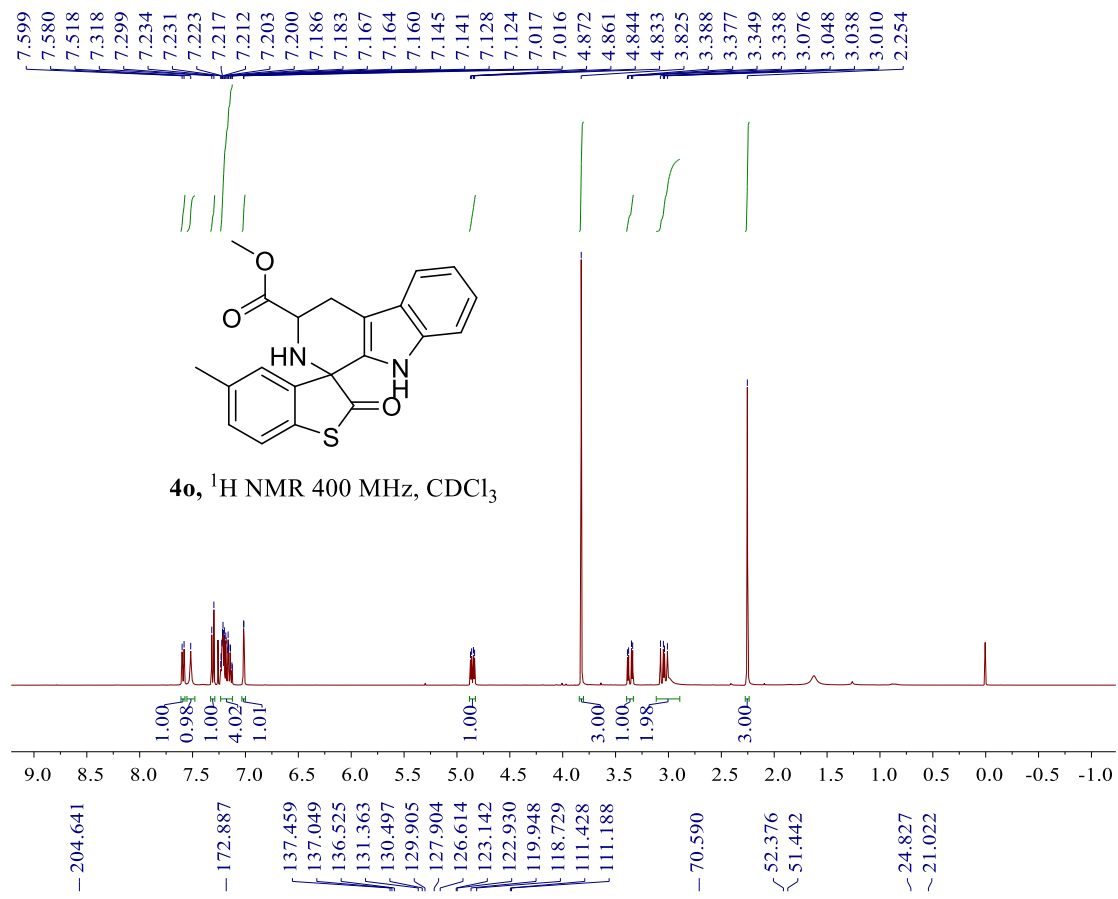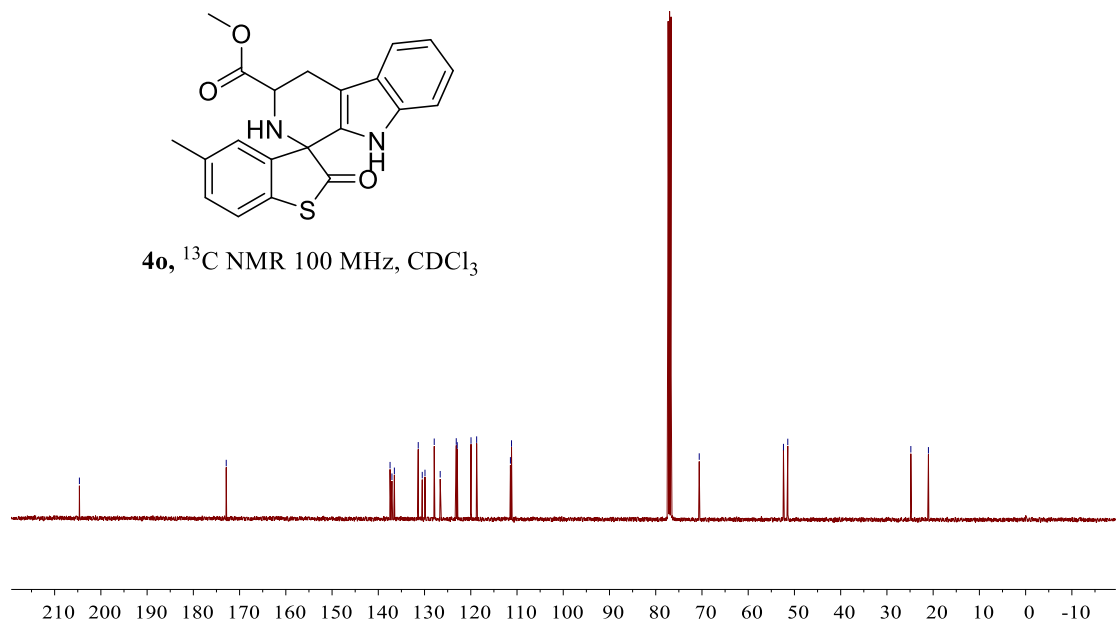

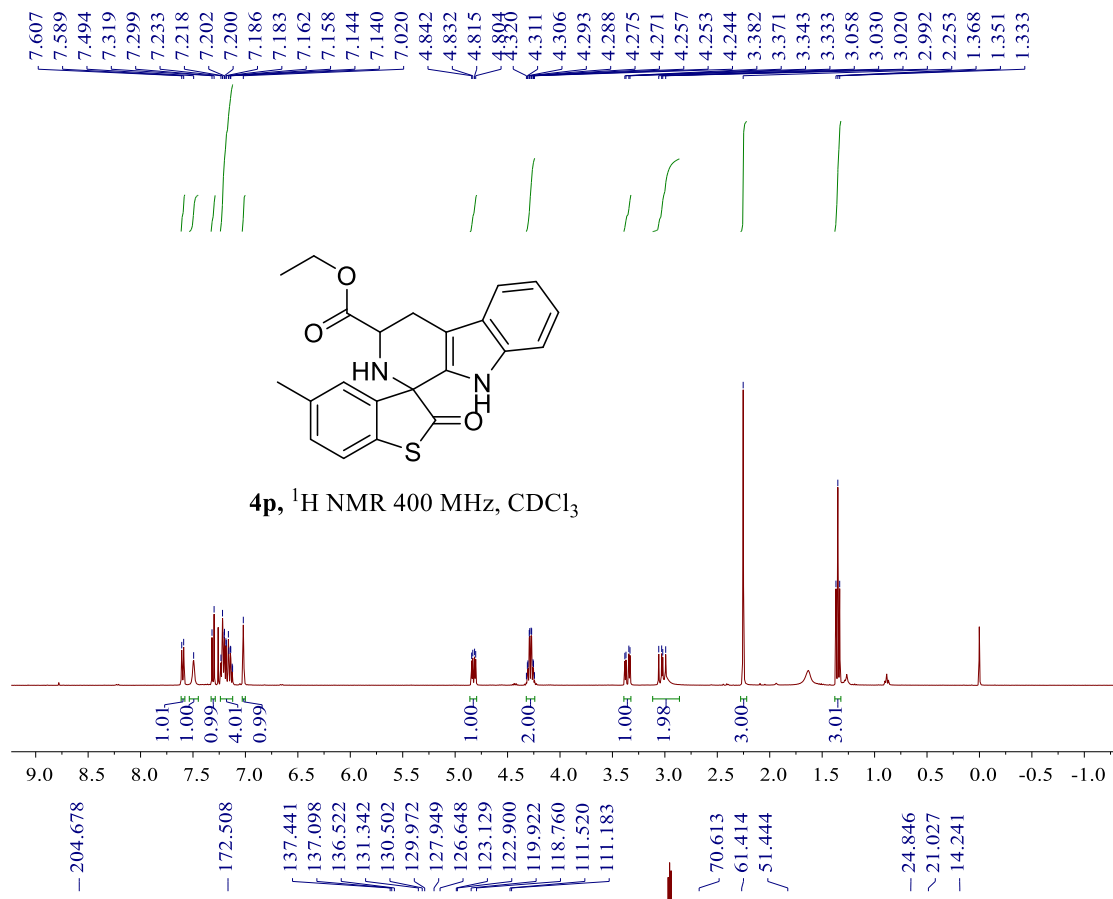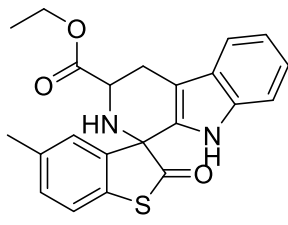

**4p**,  $^1\text{H}$  NMR 400 MHz,  $\text{CDCl}_3$

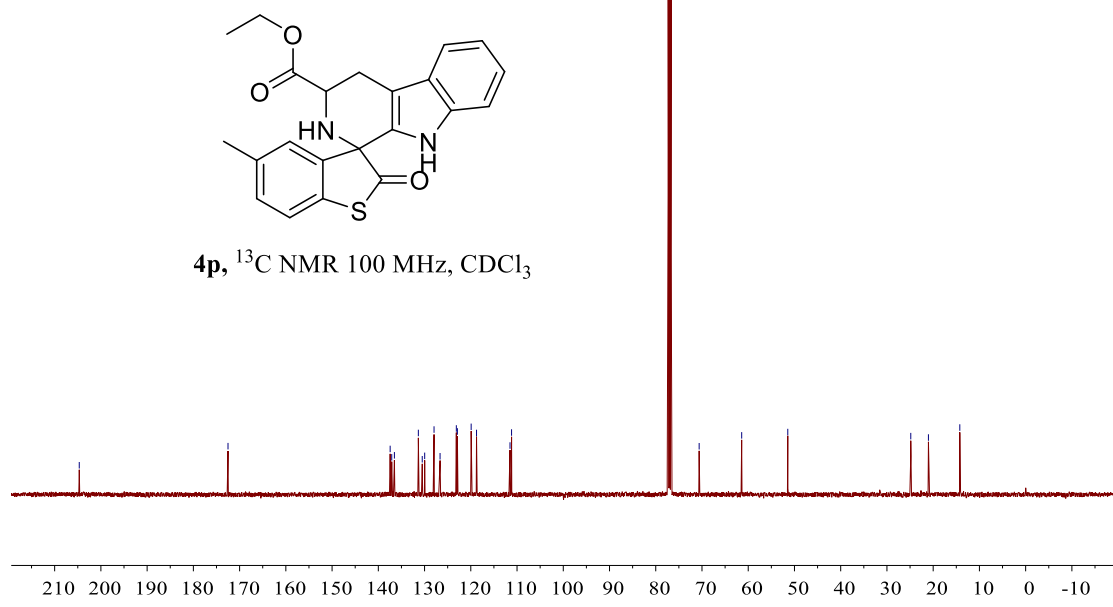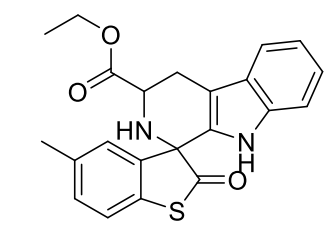

**4p**,  $^{13}\text{C}$  NMR 100 MHz,  $\text{CDCl}_3$



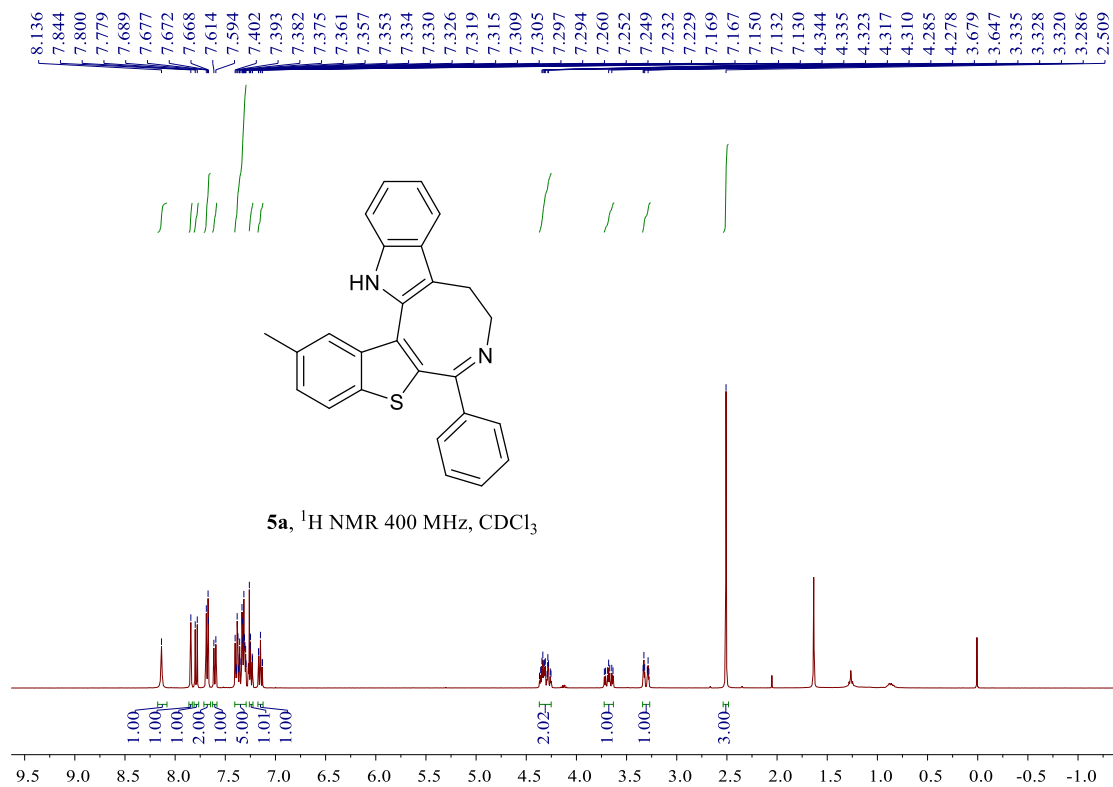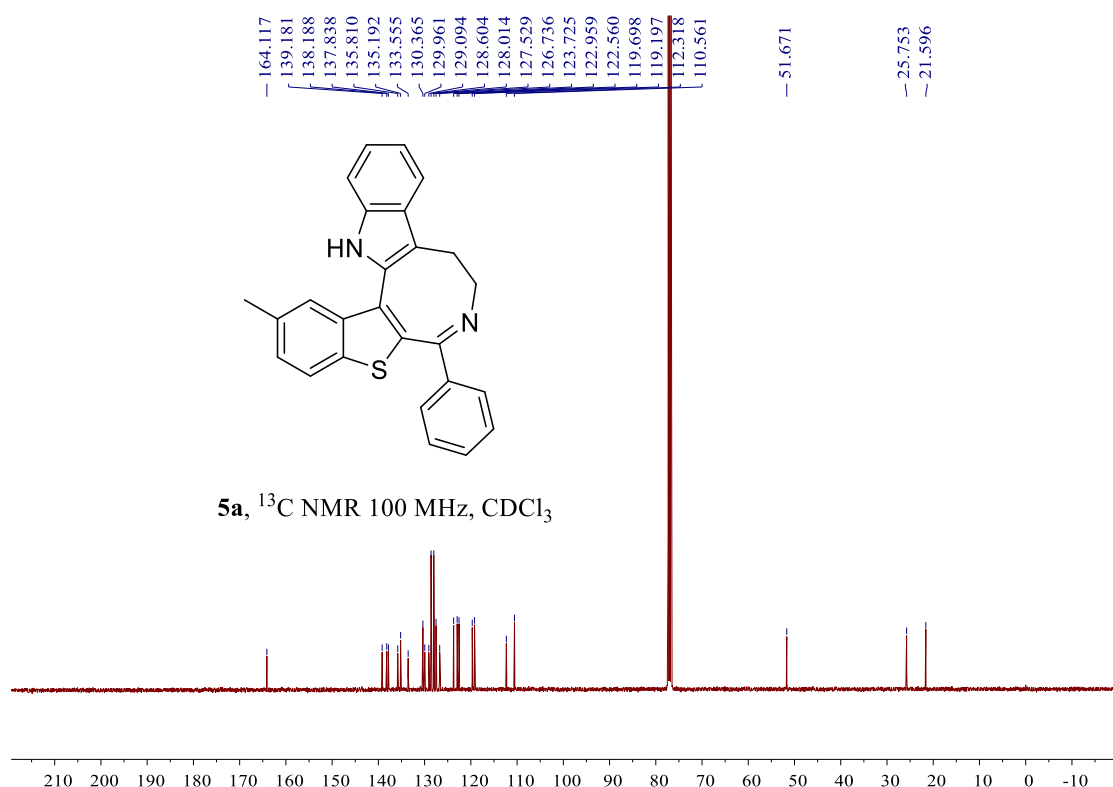

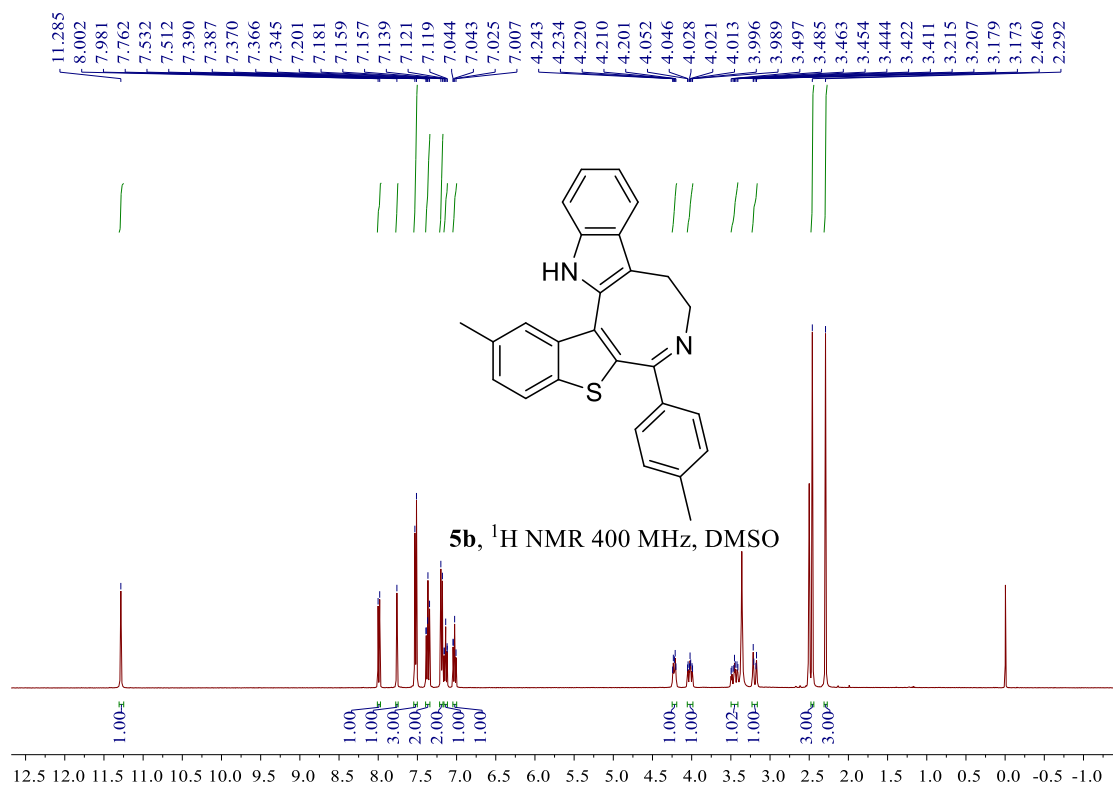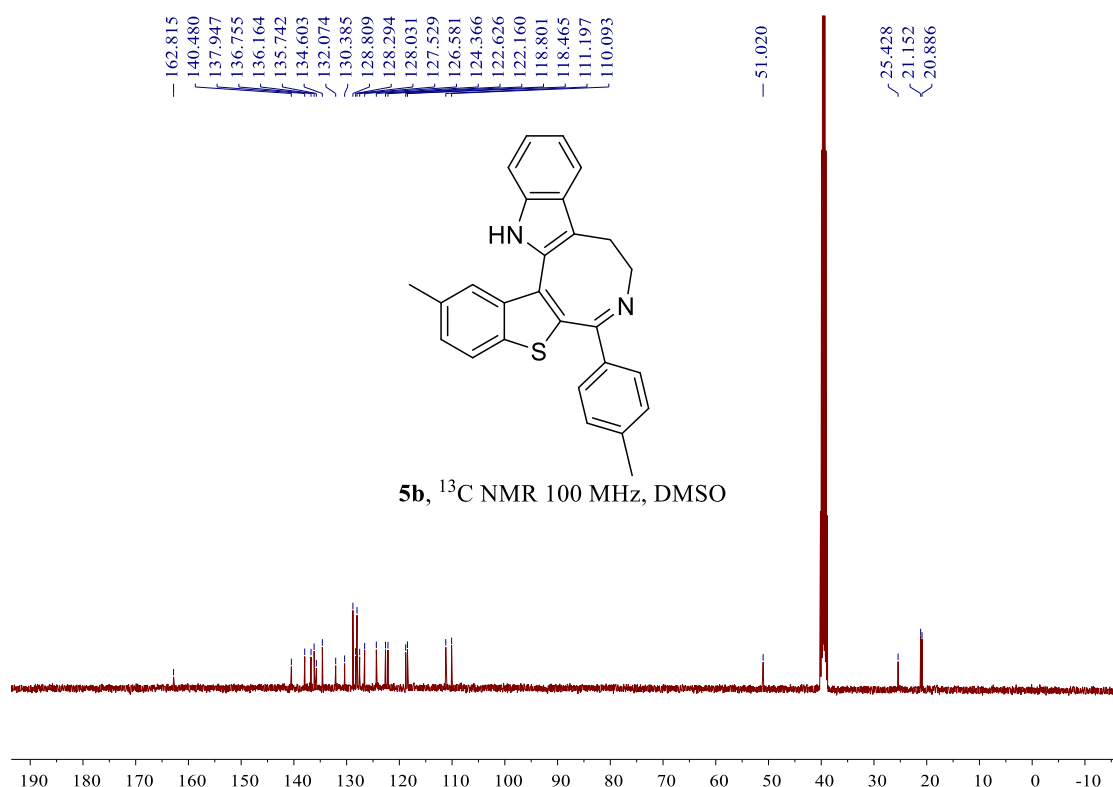

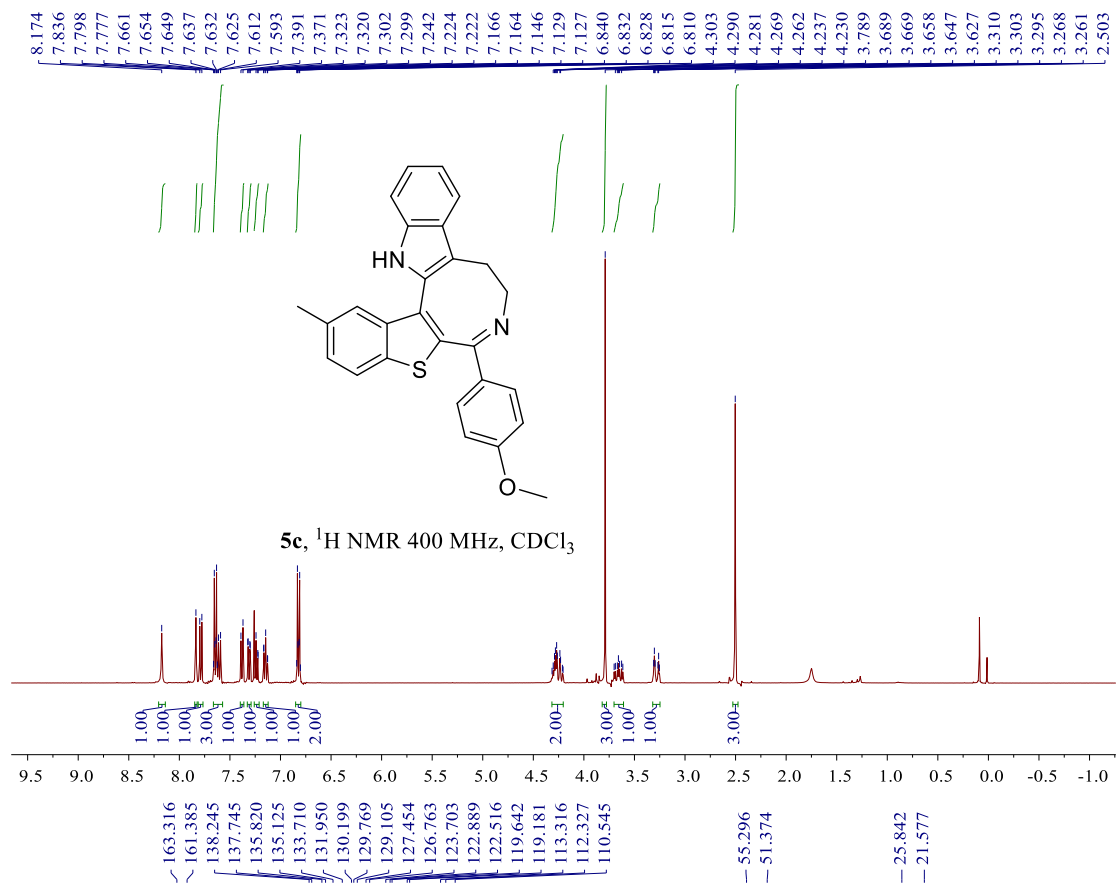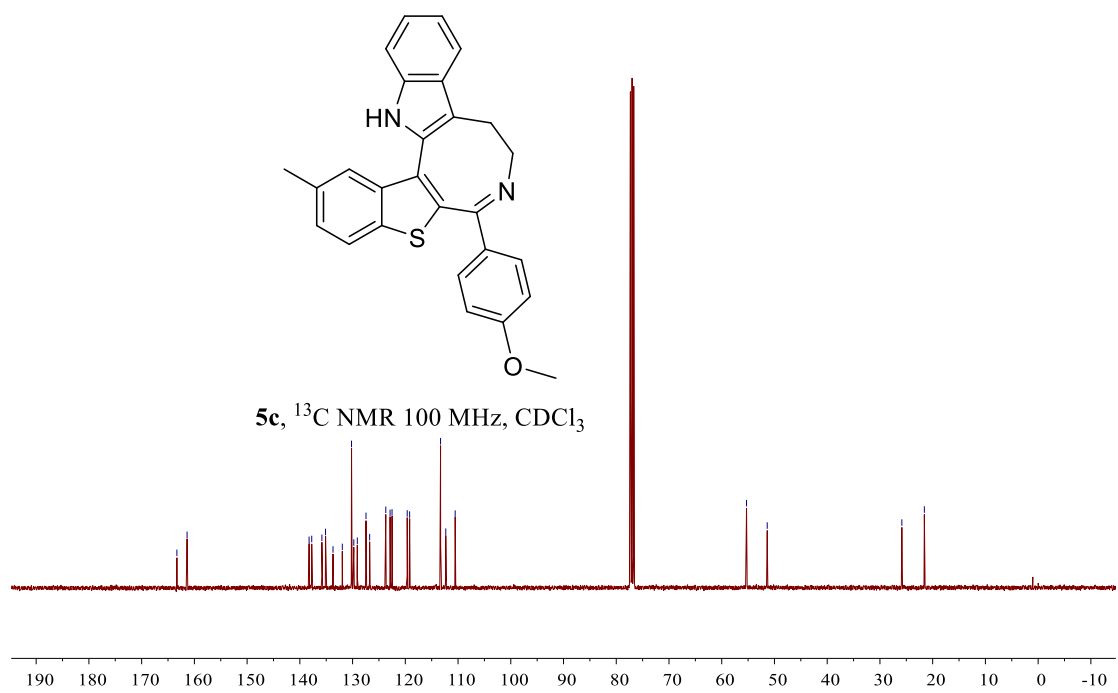

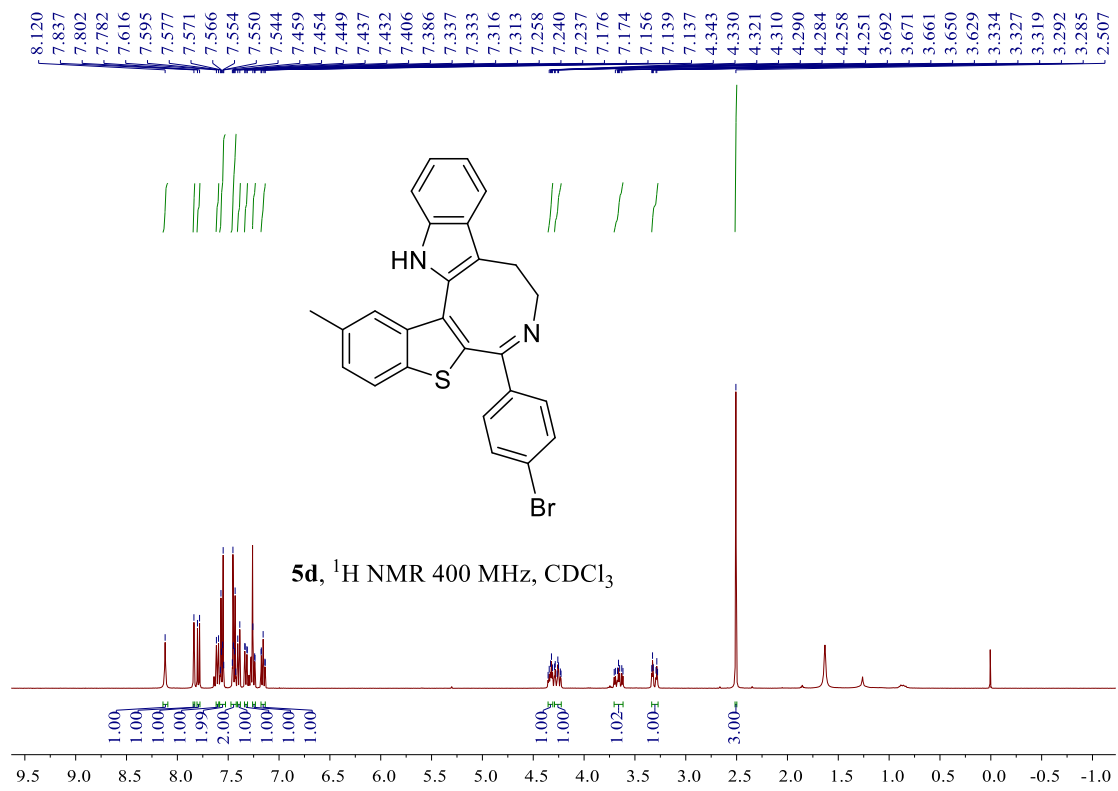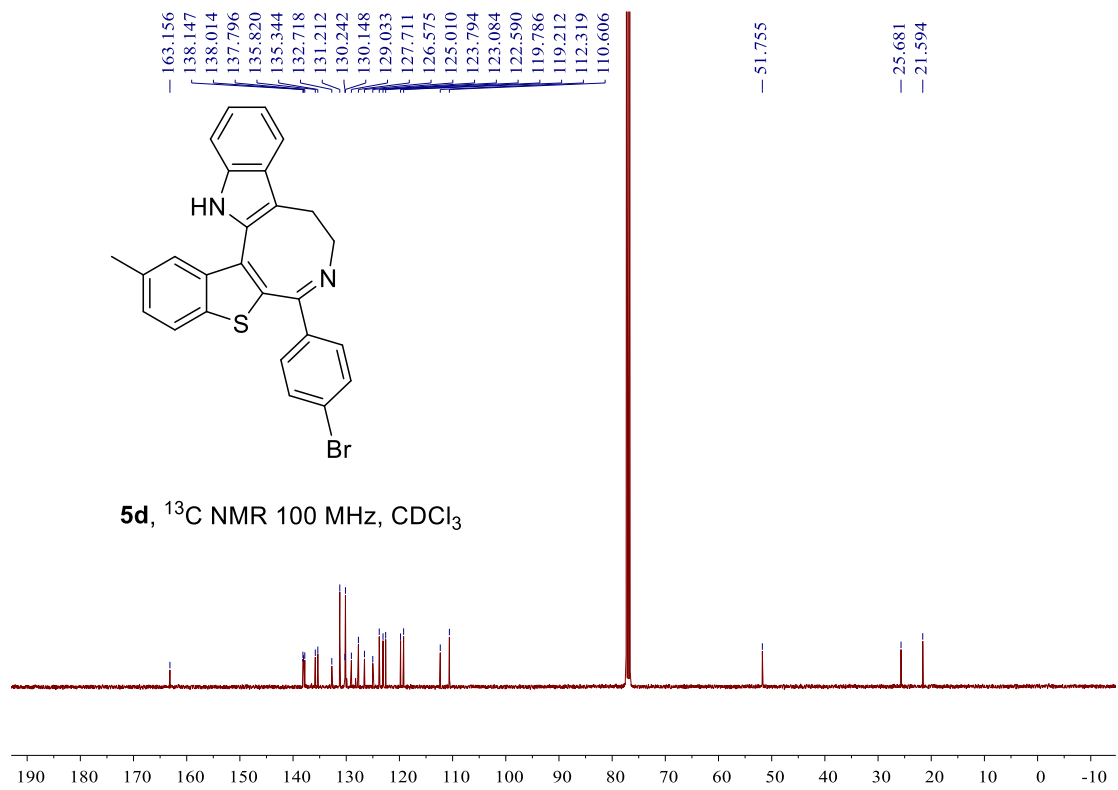

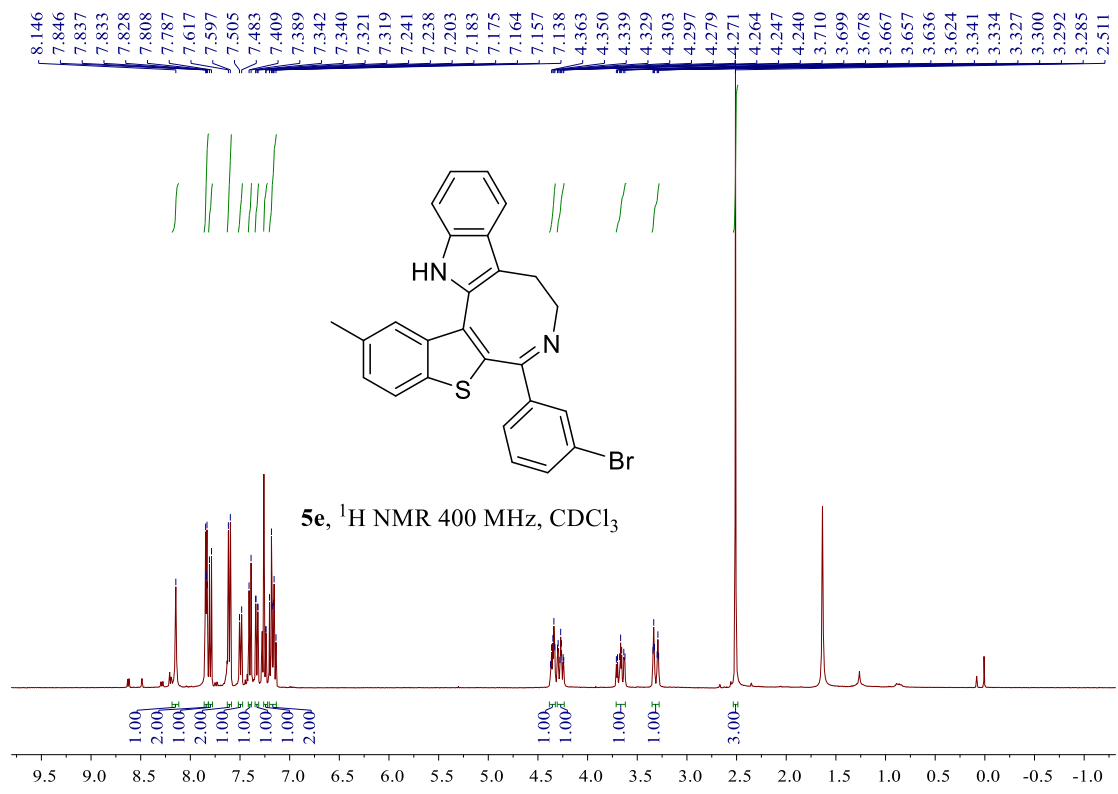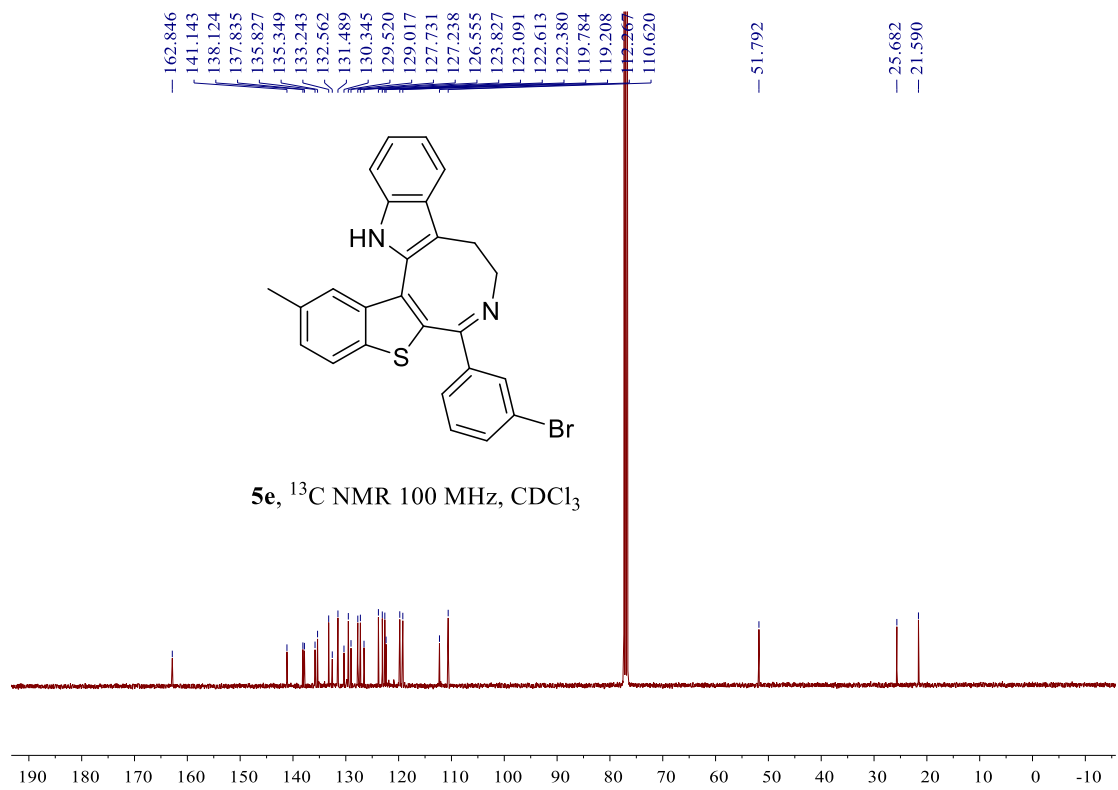

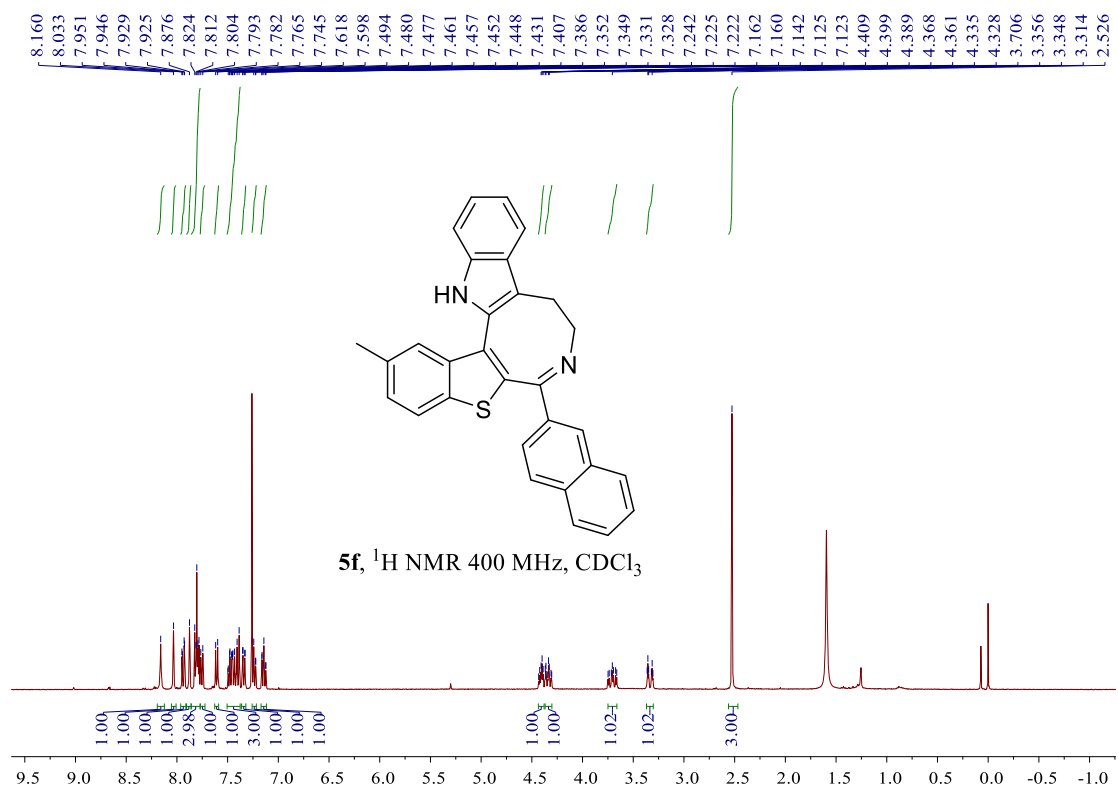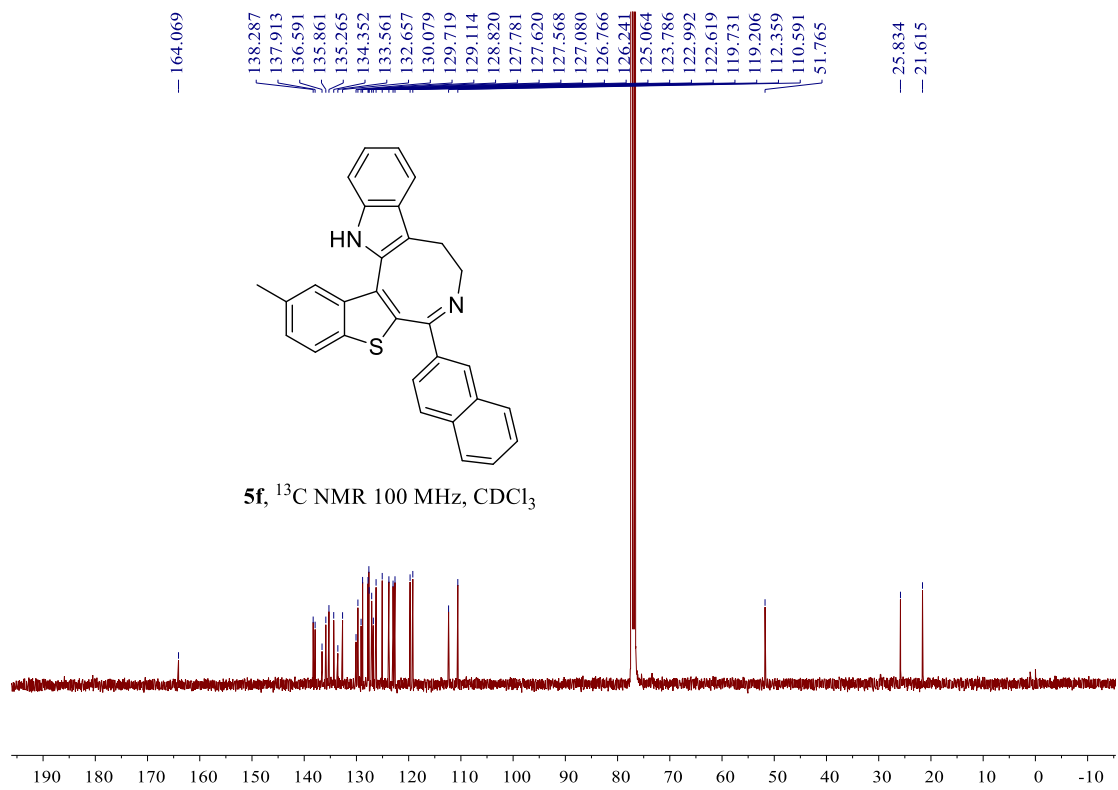

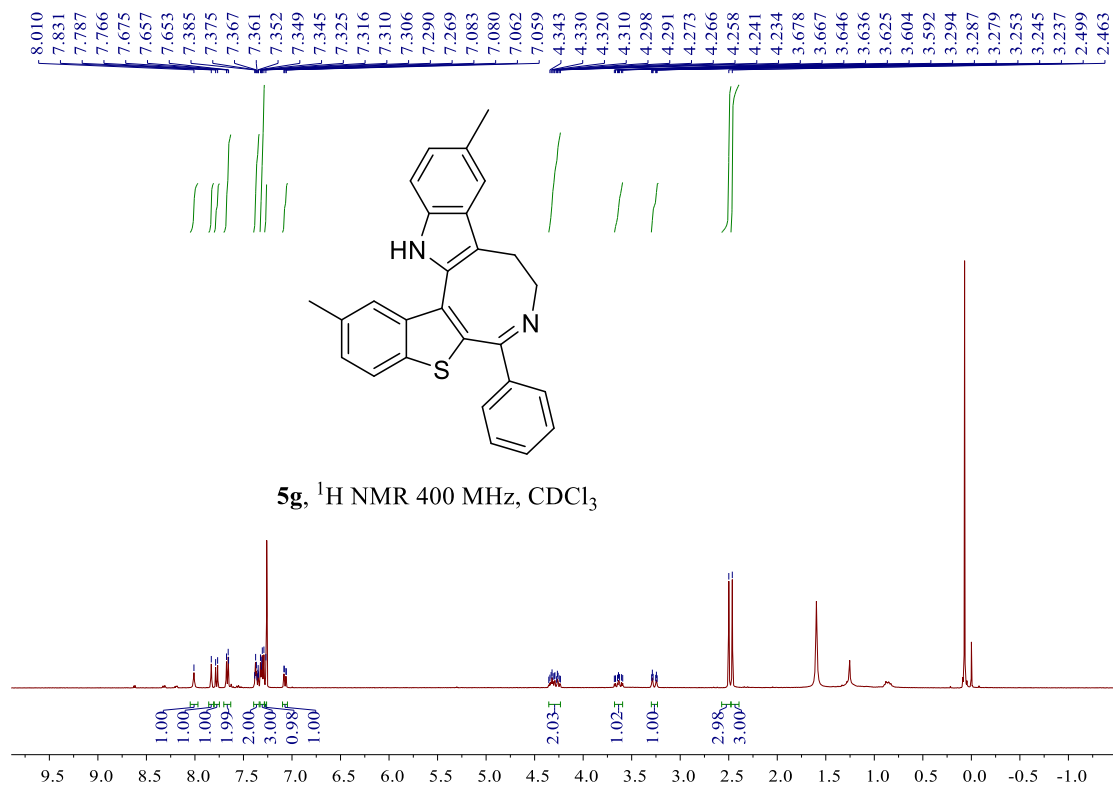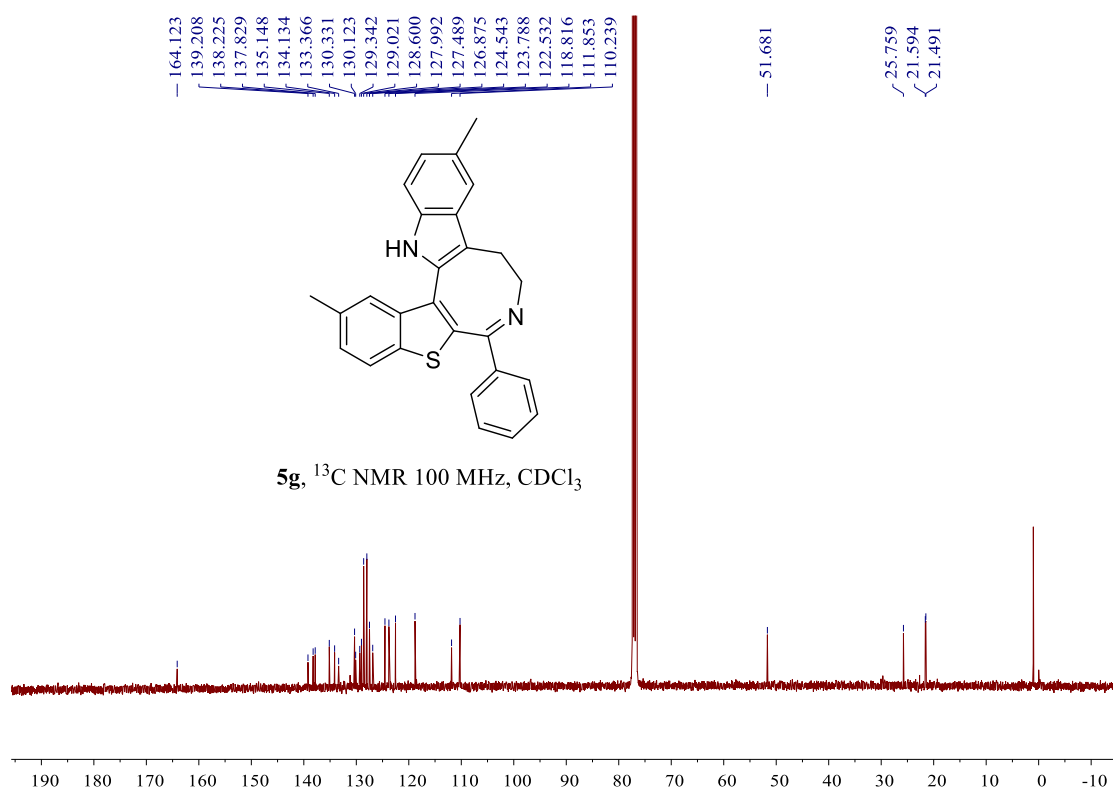

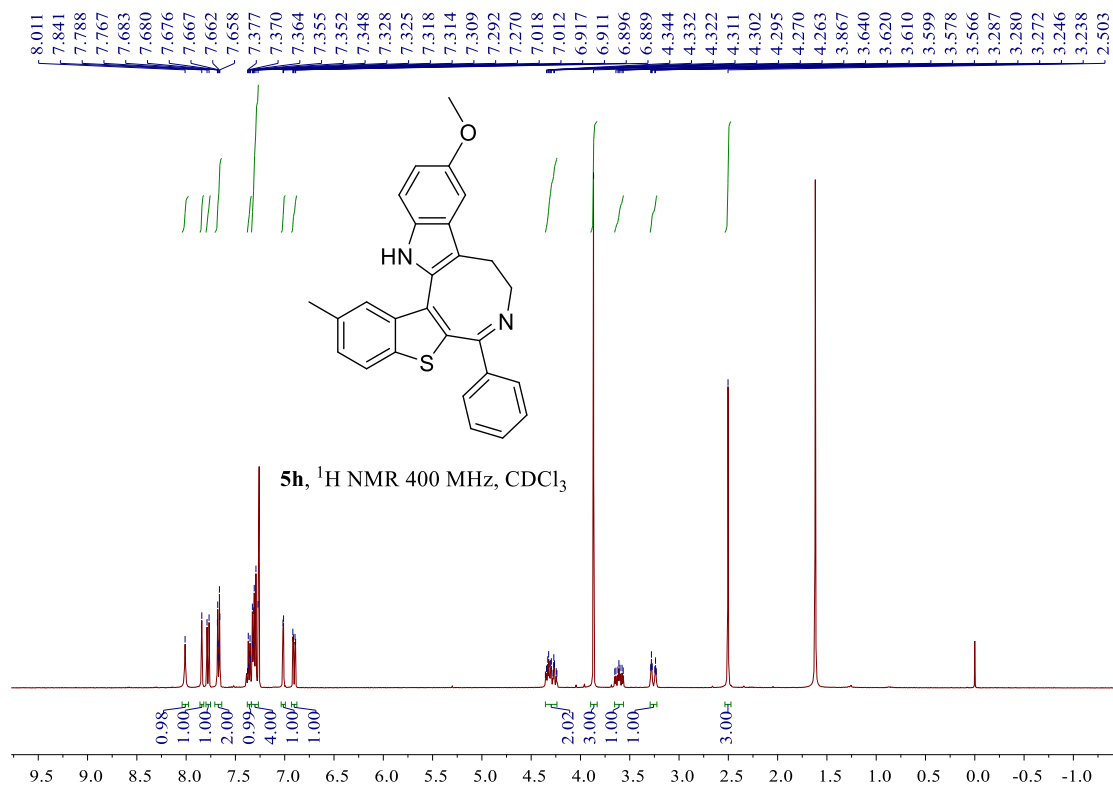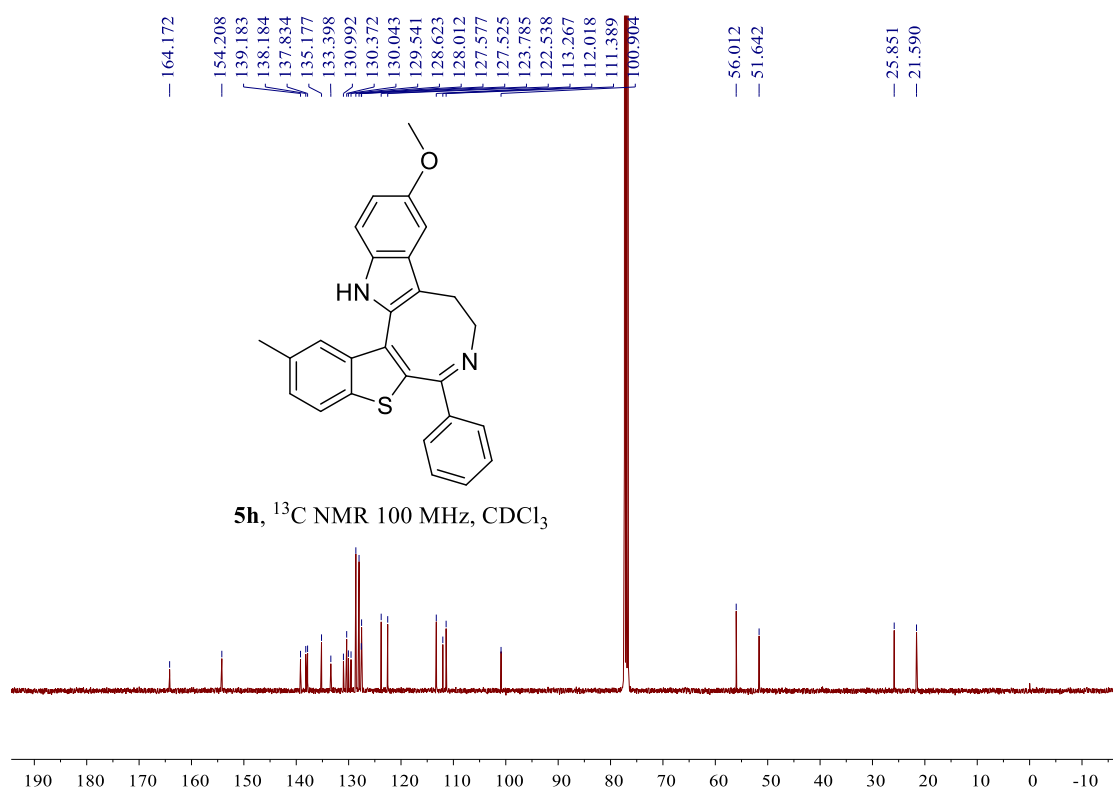



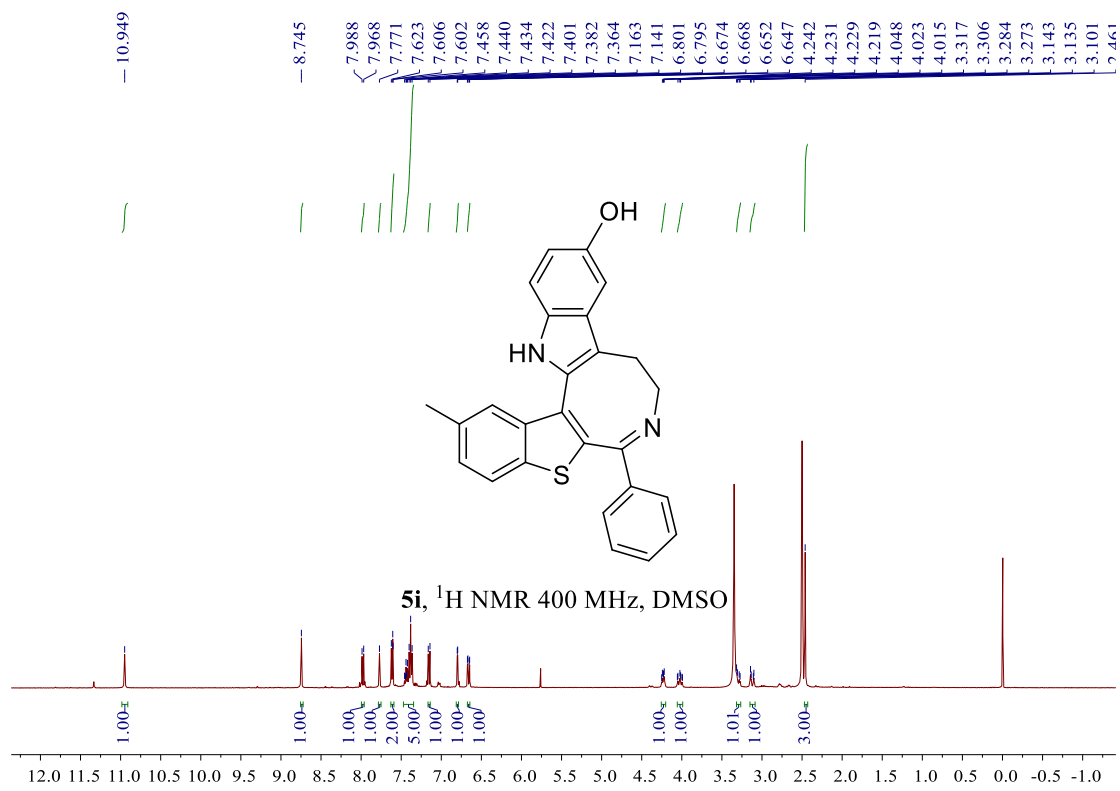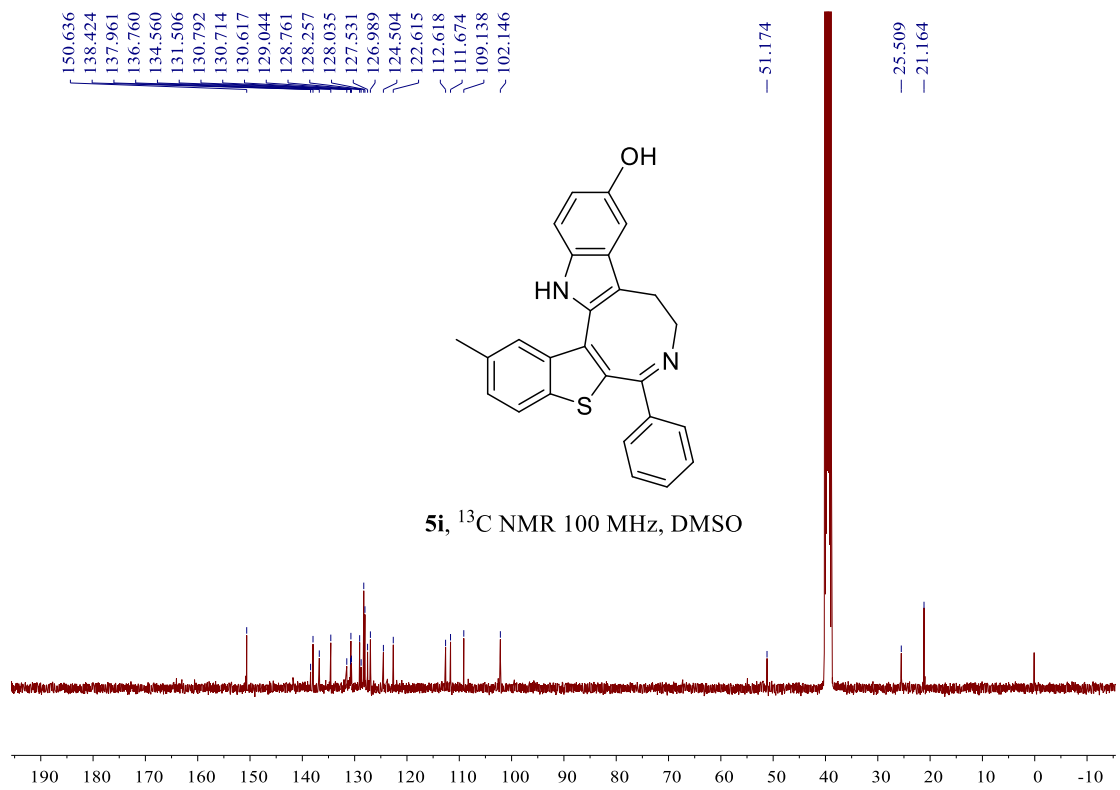



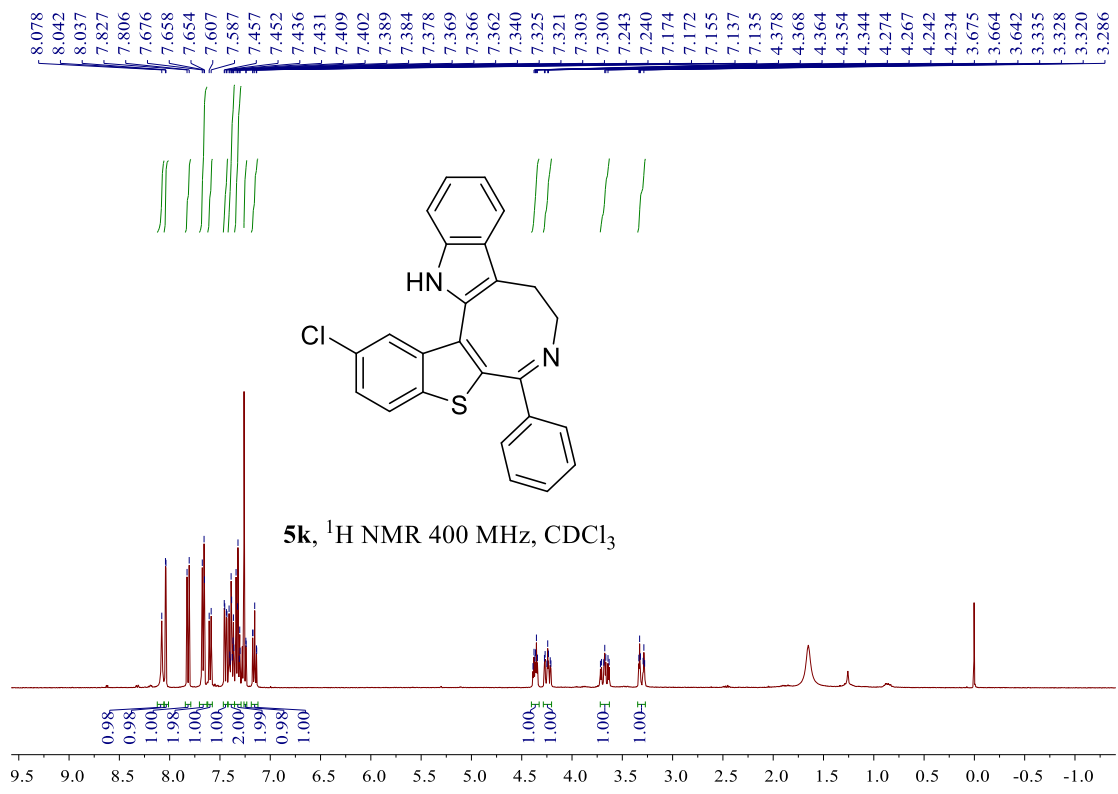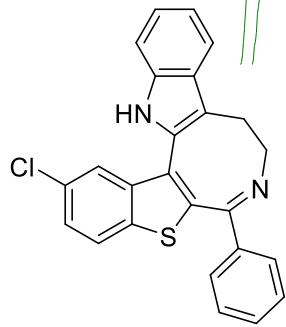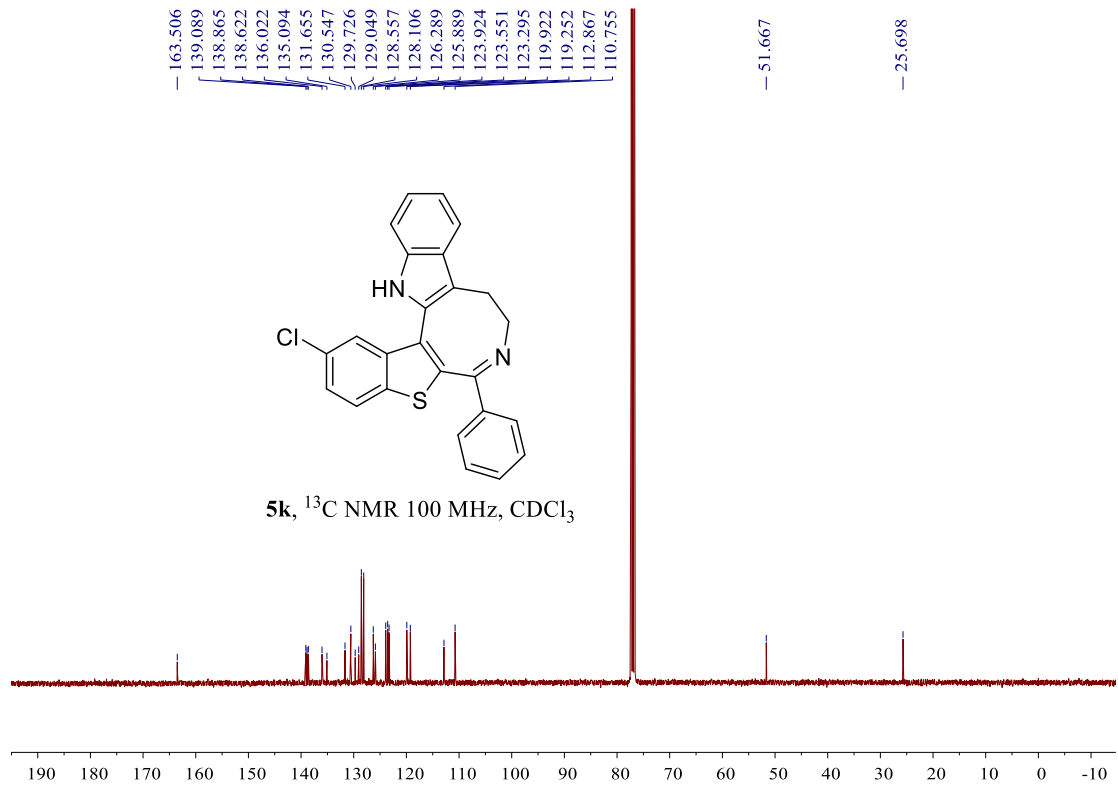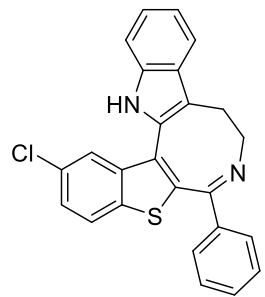

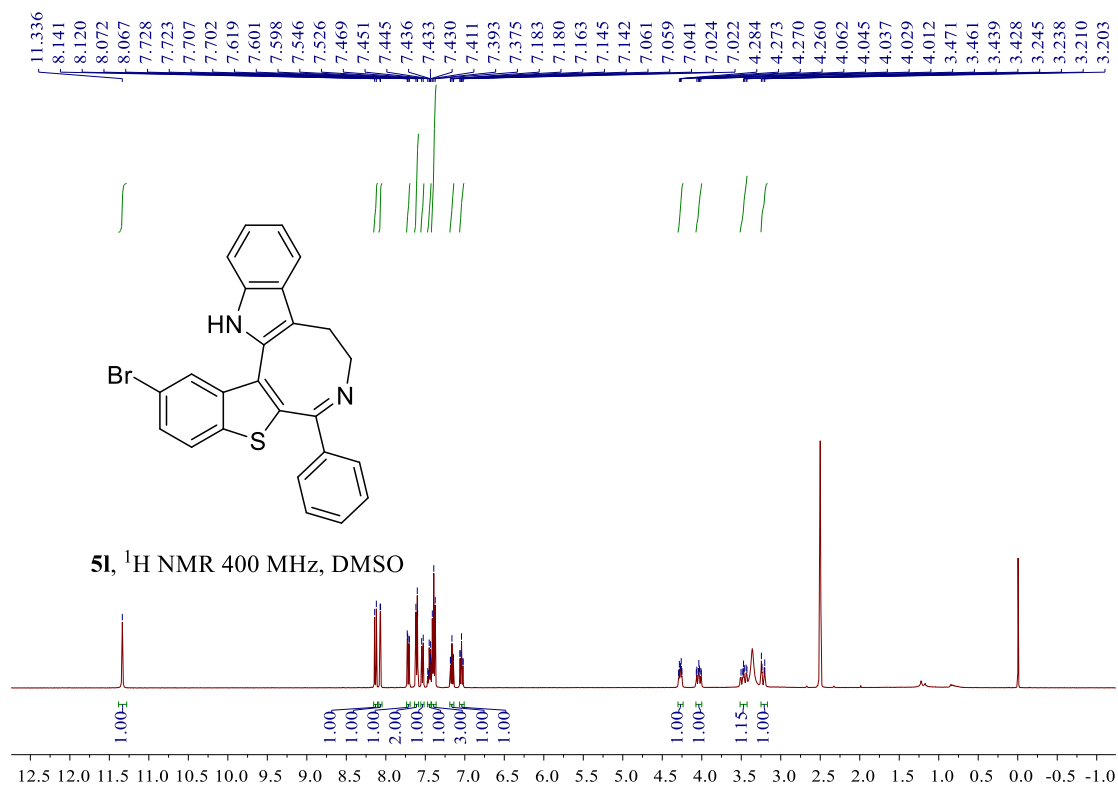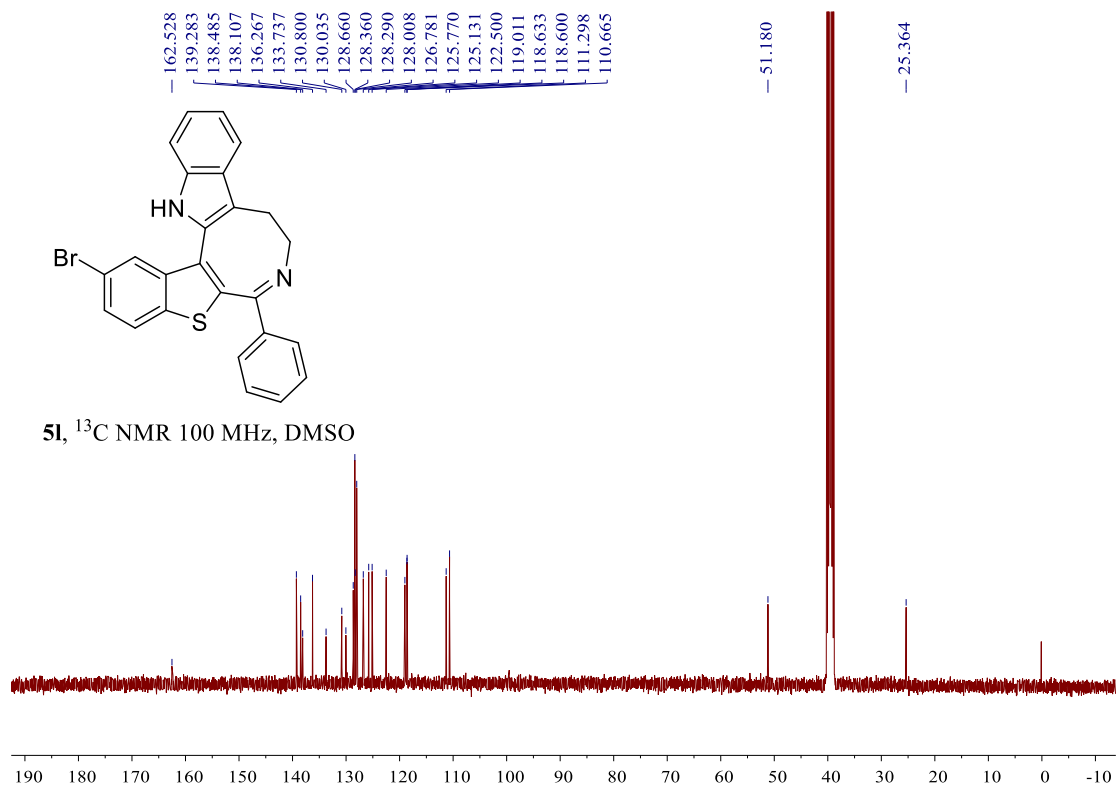

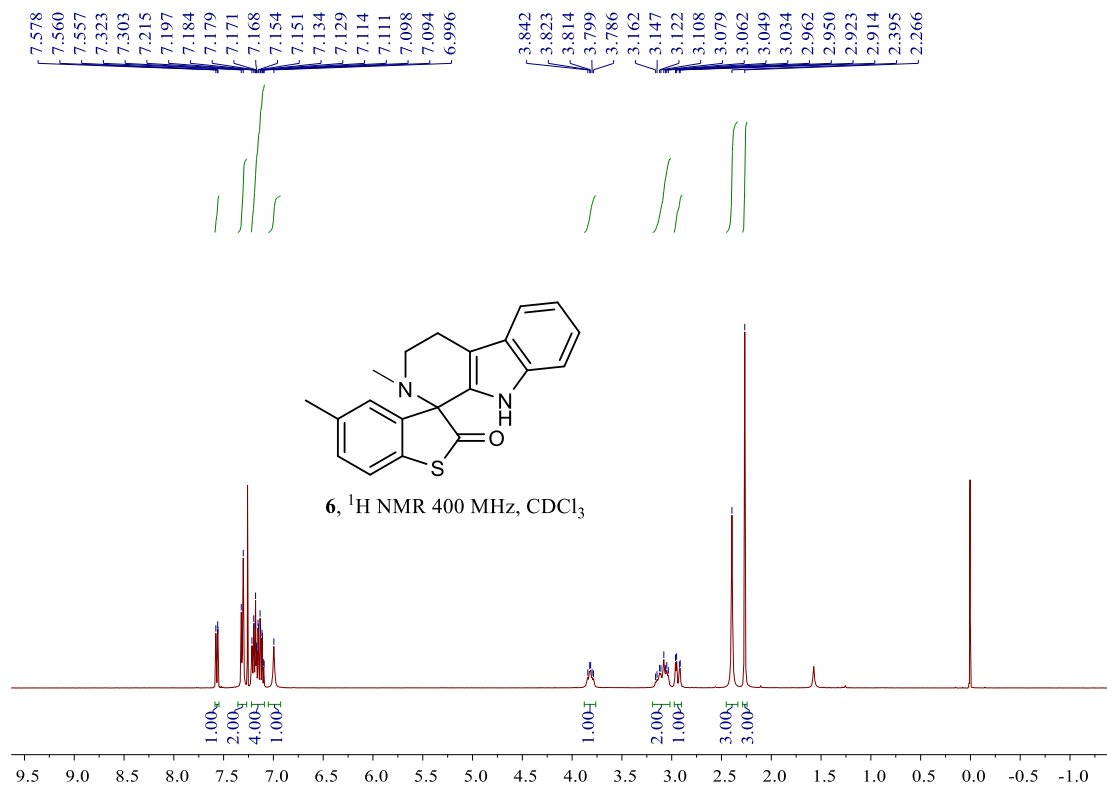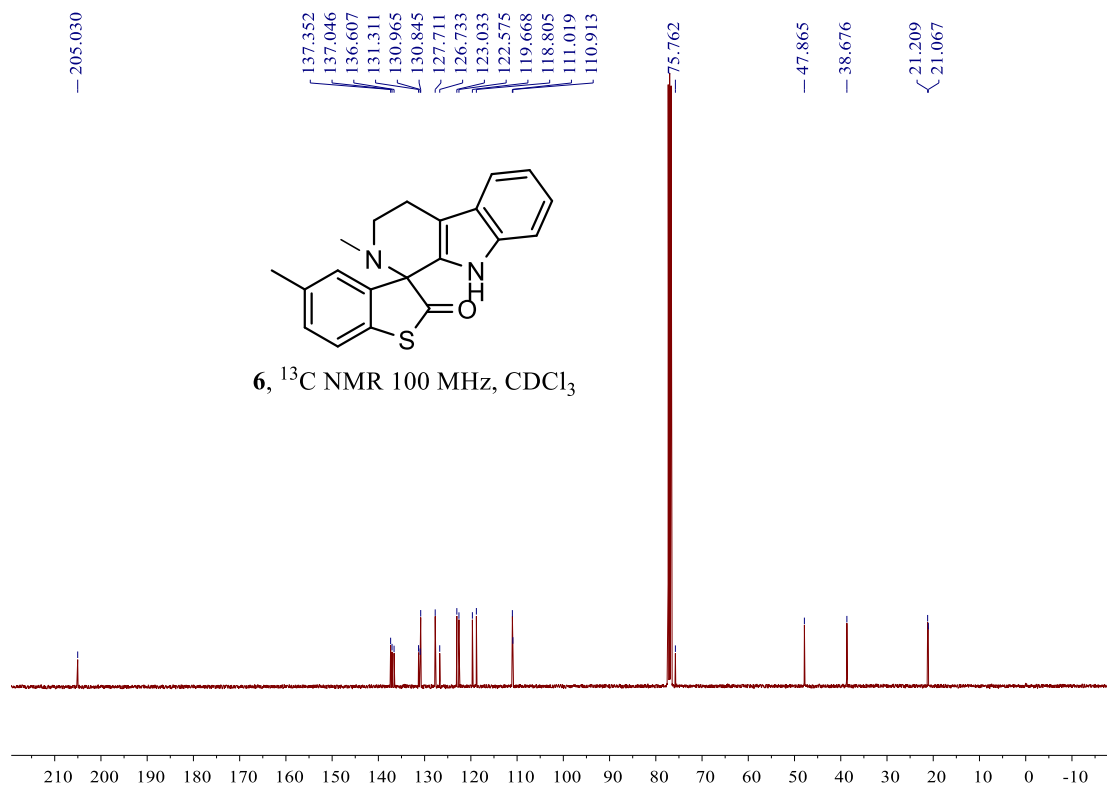

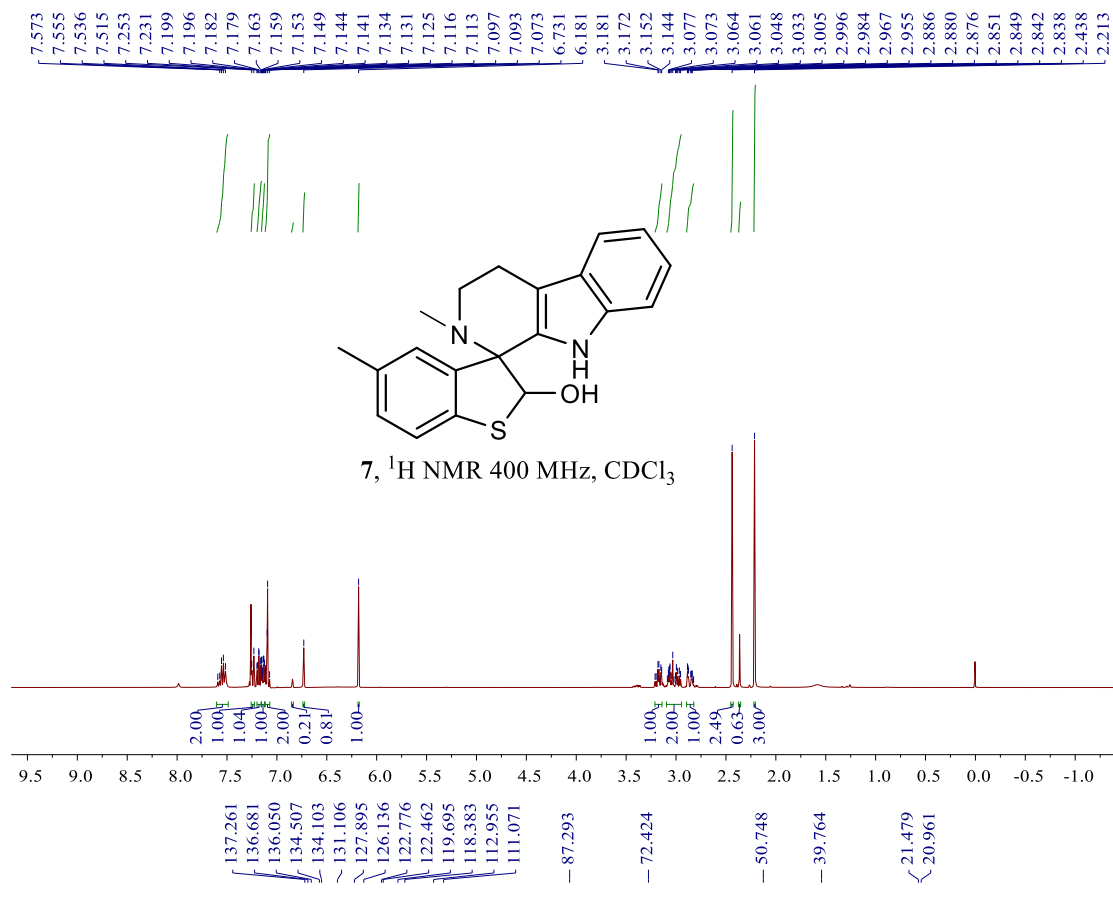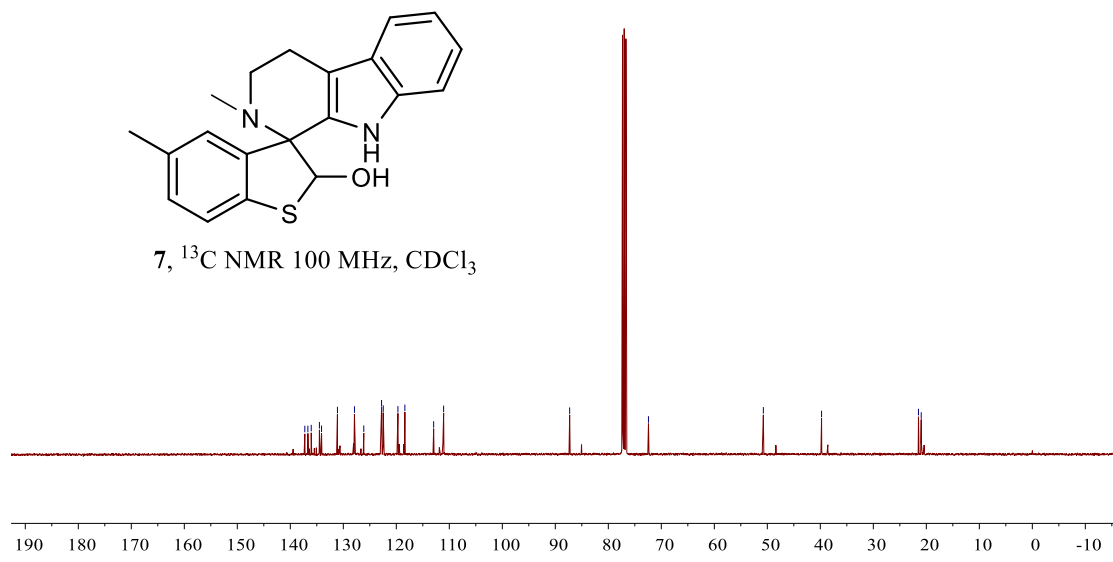

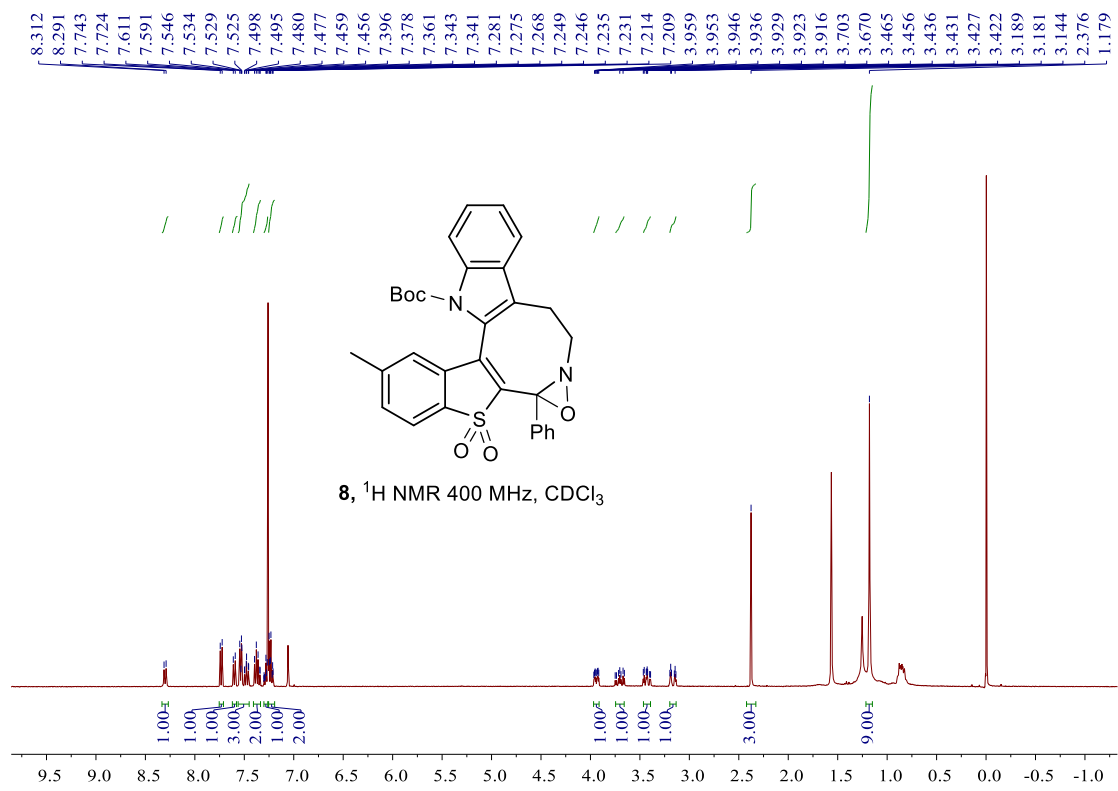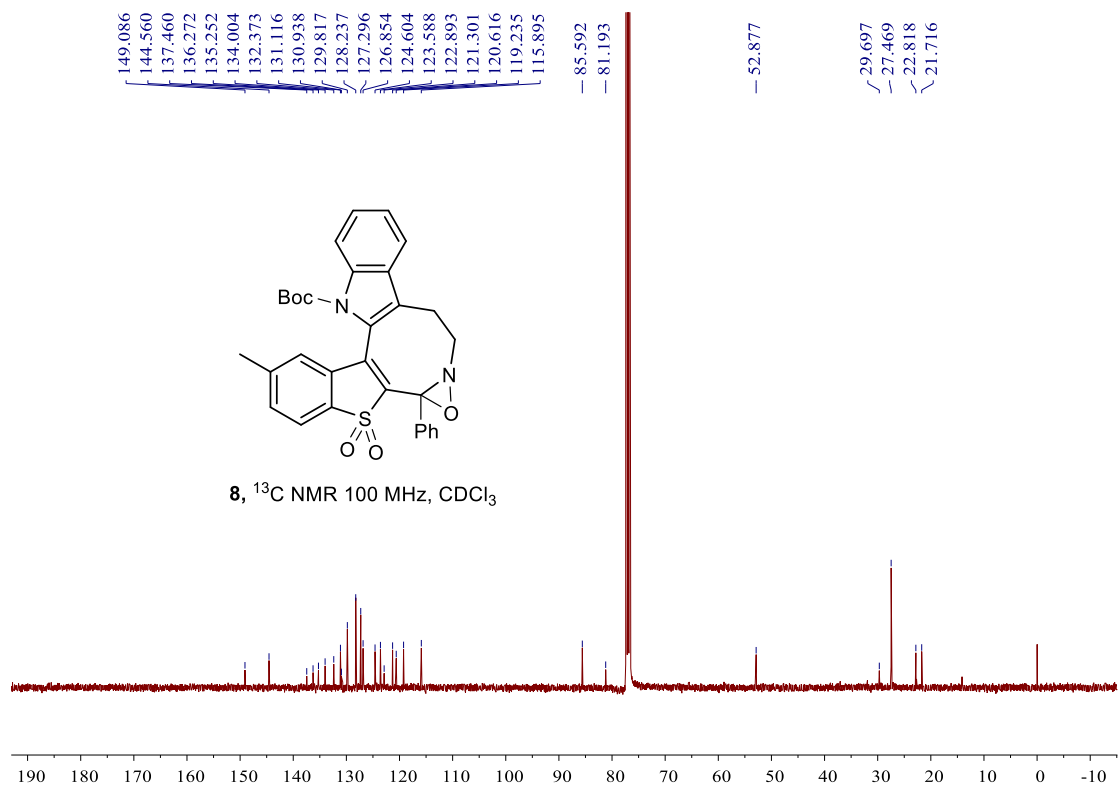

## 9. X-ray data collection and structure determinations

**Table** Crystal Data and Structure Refinements for **4a**, **5j**, **6**, **7**, **8**

|                                               | <b>4a</b>                                         | <b>5j</b>                                        |
|-----------------------------------------------|---------------------------------------------------|--------------------------------------------------|
| Chemical formula                              | C <sub>19</sub> H <sub>16</sub> N <sub>2</sub> OS | C <sub>29</sub> H <sub>26</sub> N <sub>2</sub> S |
| Formula weight                                | 320.40                                            | 434.60                                           |
| Crystal system                                | Orthorhombic                                      | Monoclinic                                       |
| Space group                                   | P2 <sub>1</sub> 2 <sub>1</sub> 2 <sub>1</sub>     | P2 <sub>1</sub> /c                               |
| <i>a</i> (Å)                                  | 9.94330(10)                                       | 10.57330(10)                                     |
| <i>b</i> (Å)                                  | 17.21630(10)                                      | 25.8833(3)                                       |
| <i>c</i> (Å)                                  | 18.86940(10)                                      | 11.55000(10)                                     |
| <i>V</i> (Å <sup>3</sup> )                    | 3230.19(4)                                        | 3100.97(5)                                       |
| $\alpha$ (°)                                  | 90                                                | 90                                               |
| $\beta$ (°)                                   | 90                                                | 101.1760(10)                                     |
| $\gamma$ (°)                                  | 90                                                | 90                                               |
| <i>Z</i>                                      | 4                                                 | 4                                                |
| F(000)                                        | 1344.0                                            | 1252.0                                           |
| <i>GOF</i>                                    | 1.043                                             | 1.025                                            |
| <i>D/g cm</i> <sup>-3</sup>                   | 1.318                                             | 1.293                                            |
| $\mu$ (mm <sup>-1</sup> )                     | 1.817                                             | 4.267                                            |
| <i>T/K</i>                                    | 293                                               | 293                                              |
| <i>R</i> <sub>a</sub> / <i>R</i> <sub>b</sub> | 0.0313/0.0861                                     | 0.0720/0.2124                                    |

<sup>a</sup>*R*= $\sum||F_o| - |F_c||/\sum|F_o|$ . <sup>b</sup>*R*<sub>w</sub>=  $[\sum[w(F_o^2 - F_c^2)^2]/\sum w(F_o^2)^2]^{1/2}$ .

|                                               | <b>6</b>                                          | <b>7</b>                                          |
|-----------------------------------------------|---------------------------------------------------|---------------------------------------------------|
| Chemical formula                              | C <sub>20</sub> H <sub>18</sub> N <sub>2</sub> OS | C <sub>20</sub> H <sub>20</sub> N <sub>2</sub> OS |
| Formula weight                                | 334.42                                            | 336.13                                            |
| Crystal system                                | Monoclinic                                        | Monoclinic                                        |
| Space group                                   | P2 <sub>1</sub> /c                                | P2 <sub>1</sub>                                   |
| <i>a</i> (Å)                                  | 13.5789(2)                                        | 11.4056(3)                                        |
| <i>b</i> (Å)                                  | 7.1947(10)                                        | 7.6851(1)                                         |
| <i>c</i> (Å)                                  | 18.2456(3)                                        | 13.5446(3)                                        |
| <i>V</i> (Å <sup>3</sup> )                    | 1710.87(5)                                        | 1095.81(5)                                        |
| $\alpha$ (°)                                  | 90                                                | 90                                                |
| $\beta$ (°)                                   | 106.301(2)                                        | 112.632(3)                                        |
| $\gamma$ (°)                                  | 90                                                | 90                                                |
| <i>Z</i>                                      | 4                                                 | 2                                                 |
| F(000)                                        | 704.0                                             | 472.0                                             |
| <i>GOF</i>                                    | 1.089                                             | 1.059                                             |
| <i>D/g cm</i> <sup>-3</sup>                   | 1.298                                             | 1.381                                             |
| $\mu$ (mm <sup>-1</sup> )                     | 1.737                                             | 4.789                                             |
| <i>T/K</i>                                    | 293                                               | 293                                               |
| <i>R</i> <sub>a</sub> / <i>R</i> <sub>b</sub> | 0.0369/0.1058                                     | 0.0537/0.1561                                     |

<sup>a</sup>*R*= $\sum||F_o| - |F_c||/\sum|F_o|$ . <sup>b</sup>*R*<sub>w</sub>=  $[\sum[w(F_o^2 - F_c^2)^2]/\sum w(F_o^2)^2]^{1/2}$ .



---

**8**

---

|                                               |                                                                 |
|-----------------------------------------------|-----------------------------------------------------------------|
| Chemical formula                              | C <sub>31</sub> H <sub>28</sub> N <sub>2</sub> O <sub>5</sub> S |
| Formula weight                                | 540.61                                                          |
| Crystal system                                | Monoclinic                                                      |
| Space group                                   | P2 <sub>1</sub> /c                                              |
| <i>a</i> (Å)                                  | 16.3292(10)                                                     |
| <i>b</i> (Å)                                  | 9.8454(6)                                                       |
| <i>c</i> (Å)                                  | 18.1637(10)                                                     |
| <i>V</i> (Å <sup>3</sup> )                    | 2750.43(3)                                                      |
| $\alpha$ (°)                                  | 90                                                              |
| $\beta$ (°)                                   | 109.633(6)                                                      |
| $\gamma$ (°)                                  | 90                                                              |
| <i>Z</i>                                      | 4                                                               |
| F(000)                                        | 1136.0                                                          |
| <i>GOF</i>                                    | 1.074                                                           |
| <i>D</i> /g cm <sup>-3</sup>                  | 1.306                                                           |
| $\mu$ (mm <sup>-1</sup> )                     | 1.402                                                           |
| <i>T</i> /K                                   | 293                                                             |
| <i>R</i> <sub>a</sub> / <i>R</i> <sub>b</sub> | 0.0635/0.1857                                                   |

$${}^aR = \frac{\sum ||F_o| - |F_c||}{\sum |F_o|}, {}^bR_w = \frac{[\sum [w(F_o^2 - F_c^2)^2]]}{\sum w(F_o^2)^2}^{1/2}.$$

---

**10. X-ray Crystal Structures**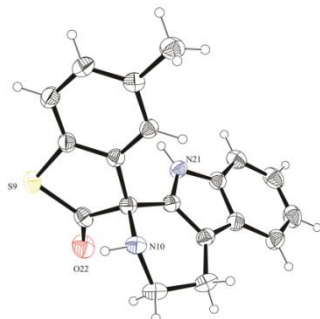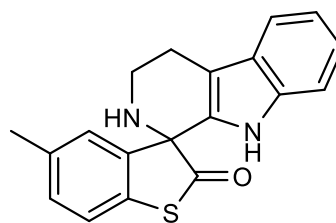**4a** (CCDC 2205447)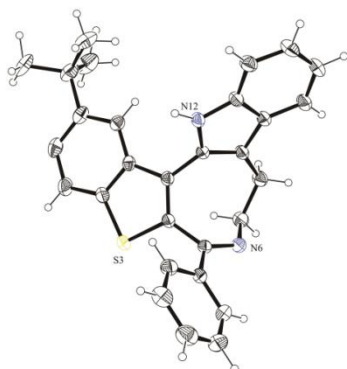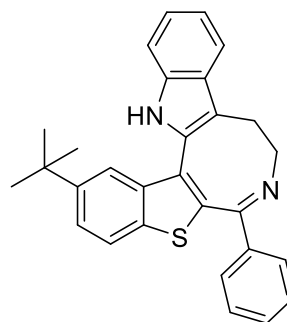**5j** (CDCC 2205448)

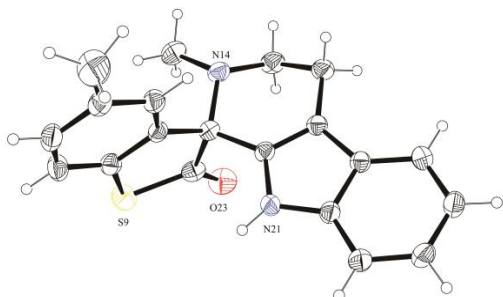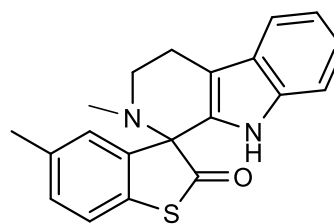

**6** (CDCC 2205449)

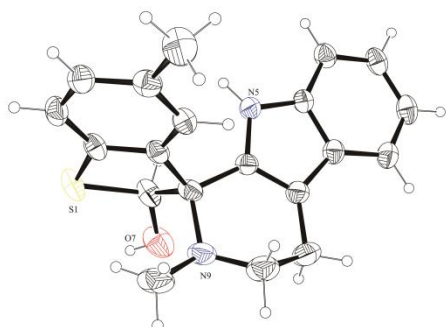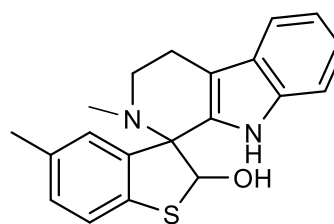

**7** (CDCC 2205450)

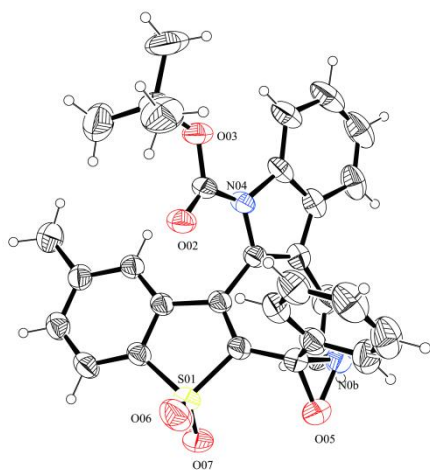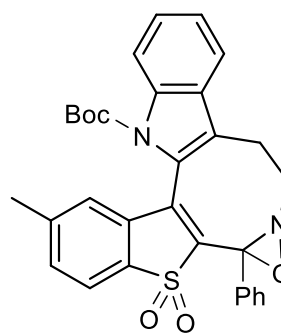

**8** (CDCC 2205451)

## 11. The results of CO detection by gas chromatography

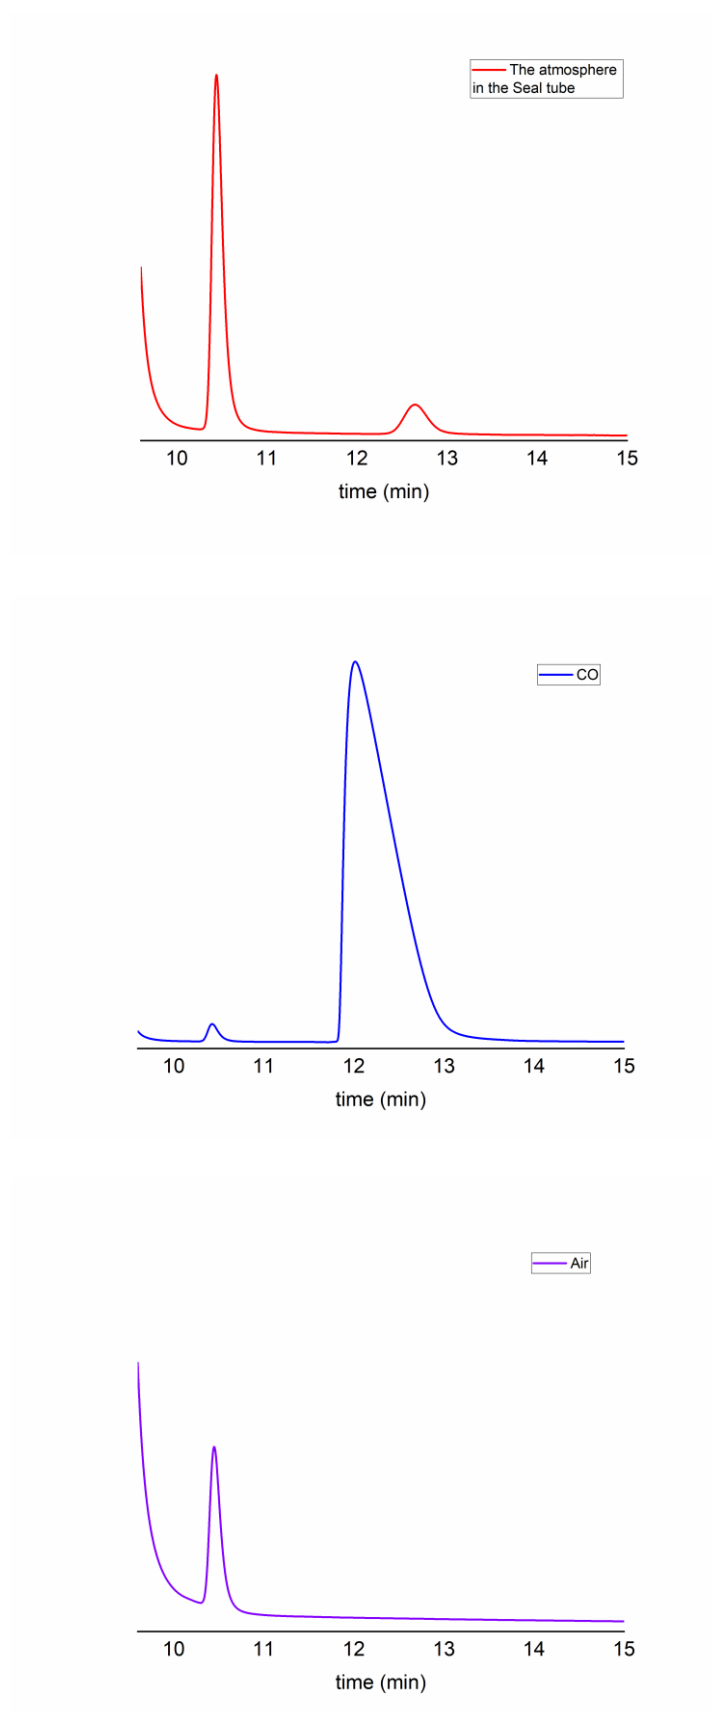

## 12. Computational materials

**Table.** Cartesian coordinates of the optimized stationary points

| Names     | Cartesian coordinates |              |              |              |
|-----------|-----------------------|--------------|--------------|--------------|
| <b>1a</b> | 6                     | -0.521734000 | -0.757387000 | 0.000053000  |
|           | 6                     | -0.407094000 | 0.645310000  | -0.000033000 |
|           | 6                     | -1.553390000 | 1.450687000  | 0.000127000  |
|           | 6                     | -2.809367000 | 0.845309000  | 0.000302000  |
|           | 6                     | -2.910259000 | -0.553219000 | 0.000339000  |
|           | 6                     | -1.769470000 | -1.369448000 | 0.000212000  |
|           | 6                     | 1.960441000  | -0.101434000 | -0.000133000 |
|           | 6                     | 0.973941000  | 1.118497000  | -0.000357000 |
|           | 1                     | -1.448588000 | 2.531880000  | 0.000051000  |
|           | 1                     | -3.708130000 | 1.453946000  | 0.000393000  |
|           | 1                     | -3.890908000 | -1.020661000 | 0.000486000  |
|           | 1                     | -1.866186000 | -2.450635000 | 0.000275000  |
|           | 16                    | 1.039902000  | -1.640142000 | 0.000002000  |
|           | 8                     | 1.398992000  | 2.259095000  | -0.000304000 |
|           | 8                     | 3.163129000  | -0.001864000 | -0.000233000 |
| <b>2a</b> | 6                     | 1.819946000  | -1.168594000 | -0.000260000 |
|           | 6                     | 1.368667000  | 0.164562000  | -0.000147000 |
|           | 6                     | 2.310225000  | 1.209951000  | 0.000140000  |
|           | 6                     | 3.675008000  | 0.930216000  | 0.000179000  |
|           | 6                     | 4.117343000  | -0.398474000 | 0.000242000  |
|           | 6                     | 3.188189000  | -1.443404000 | 0.000003000  |
|           | 1                     | 1.122065000  | -1.998822000 | -0.000372000 |
|           | 1                     | 1.956400000  | 2.235893000  | 0.000118000  |
|           | 1                     | 4.394418000  | 1.744394000  | 0.000252000  |
|           | 1                     | 5.181562000  | -0.617947000 | 0.000298000  |
|           | 1                     | 3.529099000  | -2.474913000 | -0.000019000 |
|           | 6                     | -0.082899000 | 0.517681000  | -0.000281000 |
|           | 8                     | -0.467187000 | 1.678729000  | -0.000315000 |
|           | 6                     | -1.055066000 | -0.656787000 | -0.000195000 |
|           | 1                     | -0.908296000 | -1.276922000 | -0.885934000 |
| 1         | -0.908109000          | -1.276867000 | 0.885547000  |              |
| 35        | -2.933660000          | -0.134159000 | 0.000130000  |              |
| <b>3a</b> | 6                     | -2.567124000 | 0.603881000  | -0.372971000 |
|           | 6                     | -1.510552000 | -0.194938000 | 0.151392000  |
|           | 6                     | -1.795102000 | -1.507207000 | 0.577473000  |
|           | 6                     | -3.099732000 | -1.982978000 | 0.474645000  |
|           | 6                     | -4.132469000 | -1.172192000 | -0.050041000 |
|           | 6                     | -3.881400000 | 0.128813000  | -0.480132000 |
|           | 6                     | -0.674250000 | 1.823347000  | -0.415415000 |
|           | 6                     | -0.309972000 | 0.606229000  | 0.116759000  |

|      |    |              |              |              |
|------|----|--------------|--------------|--------------|
|      | 1  | -1.009673000 | -2.141582000 | 0.981541000  |
|      | 1  | -3.331094000 | -2.993695000 | 0.801138000  |
|      | 1  | -5.141278000 | -1.570994000 | -0.119304000 |
|      | 1  | -4.675001000 | 0.752357000  | -0.883542000 |
|      | 1  | -0.083696000 | 2.707692000  | -0.612702000 |
|      | 7  | -2.025644000 | 1.826885000  | -0.705677000 |
|      | 1  | -2.527584000 | 2.603796000  | -1.112137000 |
|      | 6  | 1.049885000  | 0.151493000  | 0.577236000  |
|      | 1  | 0.958359000  | -0.317321000 | 1.567324000  |
|      | 1  | 1.439060000  | -0.625705000 | -0.095235000 |
|      | 6  | 2.064277000  | 1.289296000  | 0.659808000  |
|      | 1  | 1.753417000  | 2.058055000  | 1.370387000  |
|      | 1  | 2.235979000  | 1.754726000  | -0.313004000 |
|      | 7  | 3.401578000  | 0.774752000  | 1.114533000  |
|      | 1  | 3.338137000  | 0.303847000  | 2.022127000  |
|      | 1  | 3.821311000  | 0.089226000  | 0.419506000  |
|      | 1  | 4.074650000  | 1.539514000  | 1.220363000  |
|      | 17 | 4.626736000  | -1.226226000 | -0.914175000 |
|      | 6  | 3.928869000  | -0.159027000 | 0.371448000  |
|      | 6  | 2.958594000  | -0.154683000 | -0.644070000 |
|      | 6  | 3.140297000  | -0.924973000 | -1.795471000 |
|      | 6  | 4.286437000  | -1.714849000 | -1.912287000 |
|      | 6  | 5.240102000  | -1.724382000 | -0.886274000 |
|      | 6  | 5.074686000  | -0.941581000 | 0.264451000  |
|      | 6  | 2.069248000  | 1.532724000  | 0.937183000  |
|      | 6  | 1.823185000  | 0.743479000  | -0.373116000 |
|      | 1  | 2.394418000  | -0.899605000 | -2.584428000 |
|      | 1  | 4.439349000  | -2.320465000 | -2.800355000 |
|      | 1  | 6.129906000  | -2.340085000 | -0.982911000 |
|      | 1  | 5.828596000  | -0.942362000 | 1.045643000  |
|      | 16 | 3.568332000  | 0.940365000  | 1.735711000  |
|      | 8  | 1.361774000  | 2.414089000  | 1.362108000  |
|      | 6  | -4.295221000 | -0.289887000 | 0.812396000  |
|      | 6  | -3.383475000 | -1.027321000 | 0.002235000  |
|      | 6  | -3.626858000 | -1.116981000 | -1.383074000 |
|      | 6  | -4.744751000 | -0.481583000 | -1.916955000 |
|      | 6  | -5.632303000 | 0.248133000  | -1.093062000 |
|      | 6  | -5.421078000 | 0.352747000  | 0.279783000  |
|      | 6  | -2.688183000 | -1.126074000 | 2.147889000  |
|      | 6  | -2.362012000 | -1.554353000 | 0.879179000  |
|      | 1  | -2.953989000 | -1.675214000 | -2.029779000 |
|      | 1  | -4.940449000 | -0.544436000 | -2.984415000 |
|      | 1  | -6.495877000 | 0.735351000  | -1.538482000 |
|      | 1  | -6.104110000 | 0.911217000  | 0.914626000  |
| TS-1 |    |              |              |              |

|              |    |              |              |              |
|--------------|----|--------------|--------------|--------------|
|              | 7  | -3.841998000 | -0.368745000 | 2.112679000  |
|              | 1  | -4.287263000 | 0.049514000  | 2.917535000  |
|              | 6  | -1.173496000 | -2.386628000 | 0.487573000  |
|              | 1  | -0.788895000 | -2.926759000 | 1.361803000  |
|              | 1  | -1.468994000 | -3.150133000 | -0.244908000 |
|              | 6  | -0.016356000 | -1.579376000 | -0.146747000 |
|              | 7  | 0.585853000  | -0.596982000 | 0.766824000  |
|              | 1  | -0.373128000 | -1.029906000 | -1.024265000 |
|              | 1  | -2.188055000 | -1.314808000 | 3.088963000  |
|              | 1  | 1.083969000  | -1.052169000 | 1.533072000  |
|              | 8  | 1.060695000  | 1.173514000  | -1.278547000 |
|              | 1  | 0.141271000  | 2.134112000  | -1.131300000 |
|              | 1  | 0.774705000  | -2.261647000 | -0.470296000 |
|              | 1  | -0.135145000 | 0.001043000  | 1.177032000  |
|              | 17 | -0.929557000 | 3.145146000  | -1.237082000 |
|              | 6  | 3.999534000  | 0.148317000  | 0.337218000  |
|              | 6  | 2.935961000  | -0.408987000 | -0.387587000 |
|              | 6  | 3.175805000  | -1.482388000 | -1.247827000 |
|              | 6  | 4.463292000  | -2.020512000 | -1.336356000 |
|              | 6  | 5.507815000  | -1.474431000 | -0.583452000 |
|              | 6  | 5.288100000  | -0.374510000 | 0.253290000  |
|              | 6  | 1.879960000  | 1.518953000  | 0.766689000  |
|              | 6  | 1.625075000  | 0.312764000  | -0.212716000 |
|              | 1  | 2.375460000  | -1.888052000 | -1.858269000 |
|              | 1  | 4.650648000  | -2.859510000 | -1.999348000 |
|              | 1  | 6.506729000  | -1.894560000 | -0.657118000 |
|              | 1  | 6.106938000  | 0.064361000  | 0.814761000  |
|              | 16 | 3.570732000  | 1.593236000  | 1.298605000  |
|              | 8  | 0.993876000  | 2.262047000  | 1.122023000  |
|              | 6  | -4.176524000 | -0.065514000 | 0.909100000  |
|              | 6  | -3.359126000 | -0.965187000 | 0.166597000  |
|              | 6  | -3.721905000 | -1.276121000 | -1.159040000 |
|              | 6  | -4.862964000 | -0.692148000 | -1.701484000 |
|              | 6  | -5.654428000 | 0.203767000  | -0.946756000 |
|              | 6  | -5.323981000 | 0.528238000  | 0.366361000  |
|              | 6  | -2.492195000 | -0.734197000 | 2.242210000  |
|              | 6  | -2.284538000 | -1.380124000 | 1.040616000  |
|              | 1  | -3.123944000 | -1.962401000 | -1.753927000 |
|              | 1  | -5.151337000 | -0.924606000 | -2.723352000 |
|              | 1  | -6.537805000 | 0.646668000  | -1.399281000 |
|              | 1  | -5.932607000 | 1.214745000  | 0.949065000  |
|              | 7  | -3.619602000 | 0.052795000  | 2.166289000  |
|              | 1  | -3.981154000 | 0.620767000  | 2.919953000  |
|              | 6  | -1.162438000 | -2.329190000 | 0.722698000  |
| <b>INT-1</b> |    |              |              |              |

|      |    |              |              |              |
|------|----|--------------|--------------|--------------|
|      | 1  | -0.730587000 | -2.726999000 | 1.649538000  |
|      | 1  | -1.534427000 | -3.195865000 | 0.162050000  |
|      | 6  | -0.039351000 | -1.722374000 | -0.136264000 |
|      | 7  | 0.583398000  | -0.550267000 | 0.581512000  |
|      | 1  | -0.408411000 | -1.341015000 | -1.088257000 |
|      | 1  | -1.926565000 | -0.793051000 | 3.163164000  |
|      | 1  | 1.019201000  | -0.880595000 | 1.450762000  |
|      | 8  | 1.089078000  | 0.679850000  | -1.412899000 |
|      | 1  | 0.342088000  | 1.363594000  | -1.368401000 |
|      | 1  | 0.749721000  | -2.452844000 | -0.312396000 |
|      | 1  | -0.180441000 | 0.081352000  | 0.872740000  |
|      | 17 | -1.151410000 | 2.627365000  | -1.827455000 |
|      | 6  | -3.528384000 | -0.802080000 | -0.202558000 |
|      | 6  | -2.445378000 | -0.344205000 | 0.564426000  |
|      | 6  | -2.585762000 | -0.217436000 | 1.947467000  |
|      | 6  | -3.792127000 | -0.583030000 | 2.553916000  |
|      | 6  | -4.852440000 | -1.065813000 | 1.780685000  |
|      | 6  | -4.732969000 | -1.172925000 | 0.390300000  |
|      | 6  | -1.613695000 | -0.128264000 | -1.760094000 |
|      | 6  | -1.229085000 | -0.024828000 | -0.256201000 |
|      | 1  | -1.773490000 | 0.176131000  | 2.549723000  |
|      | 1  | -3.903216000 | -0.485963000 | 3.629546000  |
|      | 1  | -5.786105000 | -1.350175000 | 2.257420000  |
|      | 1  | -5.565040000 | -1.527295000 | -0.210140000 |
|      | 16 | -3.238412000 | -0.813462000 | -1.966018000 |
|      | 8  | -0.859410000 | 0.192531000  | -2.651953000 |
|      | 6  | 4.588744000  | -0.158784000 | -0.632236000 |
|      | 6  | 3.756102000  | -0.339716000 | 0.510405000  |
|      | 6  | 3.974363000  | 0.469534000  | 1.643559000  |
|      | 6  | 4.991273000  | 1.419995000  | 1.611244000  |
|      | 6  | 5.801110000  | 1.583647000  | 0.463901000  |
|      | 6  | 5.612693000  | 0.797553000  | -0.670427000 |
|      | 6  | 3.134229000  | -1.816838000 | -1.080233000 |
|      | 6  | 2.831294000  | -1.407051000 | 0.200611000  |
|      | 1  | 3.361417000  | 0.353985000  | 2.534270000  |
|      | 1  | 5.167794000  | 2.048356000  | 2.480541000  |
|      | 1  | 6.586986000  | 2.334568000  | 0.467734000  |
|      | 1  | 6.238082000  | 0.919321000  | -1.551207000 |
|      | 7  | 4.182668000  | -1.072239000 | -1.582519000 |
|      | 1  | 4.593250000  | -1.191449000 | -2.498042000 |
|      | 6  | 1.745621000  | -1.958035000 | 1.084360000  |
|      | 1  | 1.405977000  | -2.924404000 | 0.692472000  |
|      | 1  | 2.134494000  | -2.145230000 | 2.093711000  |
|      | 6  | 0.522969000  | -1.033586000 | 1.237638000  |
| TS-2 |    |              |              |              |

|  |    |              |              |              |
|--|----|--------------|--------------|--------------|
|  | 7  | -0.095023000 | -0.802570000 | -0.074271000 |
|  | 1  | 0.820228000  | -0.084825000 | 1.704906000  |
|  | 1  | 2.686171000  | -2.600911000 | -1.676868000 |
|  | 1  | 0.588873000  | -0.697998000 | -0.823517000 |
|  | 8  | -0.927133000 | 1.498533000  | 0.011543000  |
|  | 1  | -0.186993000 | 1.781133000  | -0.564464000 |
|  | 1  | -1.808146000 | 2.281076000  | -0.131155000 |
|  | 1  | -0.208829000 | -1.518129000 | 1.889514000  |
|  | 17 | -2.937022000 | 3.407855000  | -0.293408000 |
|  | 6  | 2.375582000  | 1.409926000  | 0.065105000  |
|  | 6  | 1.433789000  | 0.579574000  | -0.603623000 |
|  | 6  | 0.344371000  | 1.183384000  | -1.266161000 |
|  | 6  | 0.220903000  | 2.568464000  | -1.270867000 |
|  | 6  | 1.165494000  | 3.364690000  | -0.611132000 |
|  | 6  | 2.250444000  | 2.790339000  | 0.065749000  |
|  | 6  | 3.080446000  | -1.006251000 | 0.331334000  |
|  | 6  | 1.796701000  | -0.806632000 | -0.493764000 |
|  | 1  | -0.411326000 | 0.588113000  | -1.760006000 |
|  | 1  | -0.617170000 | 3.029672000  | -1.782464000 |
|  | 1  | 1.058682000  | 4.445252000  | -0.617430000 |
|  | 1  | 2.974770000  | 3.417518000  | 0.574734000  |
|  | 16 | 3.711208000  | 0.549223000  | 0.878285000  |
|  | 8  | 3.553156000  | -2.100561000 | 0.542519000  |
|  | 6  | -2.637666000 | 0.039133000  | 1.259120000  |
|  | 6  | -2.513681000 | -0.680265000 | 0.035849000  |
|  | 6  | -3.322647000 | -0.306822000 | -1.056297000 |
|  | 6  | -4.212856000 | 0.753183000  | -0.906207000 |
|  | 6  | -4.316262000 | 1.452099000  | 0.317847000  |
|  | 6  | -3.532992000 | 1.104434000  | 1.416304000  |
|  | 6  | -1.090493000 | -1.567602000 | 1.552536000  |
|  | 6  | -1.516636000 | -1.704785000 | 0.245487000  |
|  | 1  | -3.261084000 | -0.838252000 | -2.003032000 |
|  | 1  | -4.842439000 | 1.048000000  | -1.741682000 |
|  | 1  | -5.021952000 | 2.273999000  | 0.405140000  |
|  | 1  | -3.615233000 | 1.637560000  | 2.359717000  |
|  | 7  | -1.754410000 | -0.526635000 | 2.158113000  |
|  | 1  | -1.631756000 | -0.242751000 | 3.120495000  |
|  | 6  | -1.027479000 | -2.711111000 | -0.748191000 |
|  | 1  | -0.652506000 | -3.606508000 | -0.240758000 |
|  | 1  | -1.843769000 | -3.041365000 | -1.401876000 |
|  | 6  | 0.086169000  | -2.198284000 | -1.710355000 |
|  | 7  | 1.318801000  | -1.914788000 | -0.978938000 |
|  | 1  | -0.224076000 | -1.313073000 | -2.260178000 |
|  | 1  | -0.364744000 | -2.150165000 | 2.104800000  |

INT-2



|              |              |              |              |              |
|--------------|--------------|--------------|--------------|--------------|
|              | 1            | 1.867365000  | -2.739217000 | -0.710422000 |
|              | 1            | 0.330802000  | -2.982727000 | -2.430381000 |
| <b>TS-3</b>  | 6            | -2.566747000 | -0.927460000 | 0.409413000  |
|              | 6            | -2.201531000 | 0.320305000  | -0.123332000 |
|              | 6            | -3.049199000 | 0.955211000  | -1.036302000 |
|              | 6            | -4.252953000 | 0.346167000  | -1.398615000 |
|              | 6            | -4.603304000 | -0.897393000 | -0.859712000 |
|              | 6            | -3.761565000 | -1.547054000 | 0.050170000  |
|              | 6            | -0.319618000 | -0.163228000 | 1.398515000  |
|              | 6            | -0.889673000 | 0.822987000  | 0.361518000  |
|              | 1            | -2.777160000 | 1.910909000  | -1.477533000 |
|              | 1            | -4.913258000 | 0.838335000  | -2.105822000 |
|              | 1            | -5.538427000 | -1.368294000 | -1.148418000 |
|              | 1            | -4.038961000 | -2.509194000 | 0.469556000  |
|              | 16           | -1.390652000 | -1.587492000 | 1.571887000  |
|              | 8            | 0.704604000  | -0.012690000 | 2.025040000  |
|              | 6            | 2.058686000  | -0.955097000 | -0.910643000 |
|              | 6            | 2.554149000  | 0.328472000  | -0.501660000 |
|              | 6            | 3.886568000  | 0.447489000  | -0.023972000 |
|              | 6            | 4.671601000  | -0.684562000 | 0.021362000  |
|              | 6            | 4.159658000  | -1.948032000 | -0.395357000 |
|              | 6            | 2.863222000  | -2.107089000 | -0.855607000 |
|              | 6            | 0.358648000  | 0.525378000  | -1.151008000 |
|              | 6            | 1.515337000  | 1.259120000  | -0.689003000 |
|              | 1            | 4.275666000  | 1.411789000  | 0.288812000  |
|              | 1            | 5.696028000  | -0.623013000 | 0.375281000  |
|              | 1            | 4.812045000  | -2.815519000 | -0.349433000 |
|              | 1            | 2.485054000  | -3.075328000 | -1.167232000 |
|              | 7            | 0.762972000  | -0.810584000 | -1.310108000 |
|              | 1            | 0.199516000  | -1.533268000 | -1.739770000 |
|              | 6            | 1.434542000  | 2.676828000  | -0.289643000 |
|              | 1            | 2.410171000  | 3.075082000  | 0.001823000  |
|              | 1            | 1.029345000  | 3.297332000  | -1.095109000 |
|              | 6            | 0.457991000  | 2.808608000  | 0.947554000  |
| 7            | -0.804122000 | 2.159112000  | 0.676032000  |              |
| 1            | -1.508806000 | 2.748625000  | 0.244371000  |              |
| 1            | 0.264247000  | 3.863207000  | 1.147532000  |              |
| 1            | -0.323484000 | 0.919271000  | -1.896443000 |              |
| 1            | 0.934804000  | 2.357854000  | 1.818350000  |              |
| <b>INT-3</b> | 6            | -2.751519000 | -0.726692000 | 0.486241000  |
|              | 6            | -2.121290000 | 0.185117000  | -0.373334000 |
|              | 6            | -2.749372000 | 0.547486000  | -1.566337000 |
|              | 6            | -3.998230000 | 0.004370000  | -1.887044000 |
|              | 6            | -4.614144000 | -0.902628000 | -1.018595000 |

|                |    |              |              |              |
|----------------|----|--------------|--------------|--------------|
|                | 6  | -3.993827000 | -1.278861000 | 0.177803000  |
|                | 6  | -0.477788000 | -0.031945000 | 1.454678000  |
|                | 6  | -0.793412000 | 0.712819000  | 0.121173000  |
|                | 1  | -2.277771000 | 1.247459000  | -2.252550000 |
|                | 1  | -4.485715000 | 0.287450000  | -2.814948000 |
|                | 1  | -5.582732000 | -1.324075000 | -1.271712000 |
|                | 1  | -4.472331000 | -1.984309000 | 0.850260000  |
|                | 16 | -1.824273000 | -1.091955000 | 1.962816000  |
|                | 8  | 0.546702000  | 0.108884000  | 2.084550000  |
|                | 6  | 2.148737000  | -1.064938000 | -0.704144000 |
|                | 6  | 2.671066000  | 0.255884000  | -0.426582000 |
|                | 6  | 4.050475000  | 0.420930000  | -0.094907000 |
|                | 6  | 4.848704000  | -0.693545000 | -0.061027000 |
|                | 6  | 4.311901000  | -1.991005000 | -0.349141000 |
|                | 6  | 2.985604000  | -2.200940000 | -0.666738000 |
|                | 6  | 0.396239000  | 0.397521000  | -0.924446000 |
|                | 6  | 1.624204000  | 1.154228000  | -0.556084000 |
|                | 1  | 4.448118000  | 1.408249000  | 0.116704000  |
|                | 1  | 5.902414000  | -0.606555000 | 0.182933000  |
|                | 1  | 4.982874000  | -2.844697000 | -0.314813000 |
|                | 1  | 2.599237000  | -3.192085000 | -0.878930000 |
|                | 7  | 0.831779000  | -0.979572000 | -0.969311000 |
|                | 1  | 0.263138000  | -1.738550000 | -1.325625000 |
|                | 6  | 1.524670000  | 2.601293000  | -0.287729000 |
|                | 1  | 2.460735000  | 3.014650000  | 0.097203000  |
|                | 1  | 1.267135000  | 3.134354000  | -1.211956000 |
|                | 6  | 0.359070000  | 2.840006000  | 0.740976000  |
|                | 7  | -0.863363000 | 2.130016000  | 0.401256000  |
|                | 1  | -1.439026000 | 2.622995000  | -0.274913000 |
|                | 1  | 0.127980000  | 3.906466000  | 0.776779000  |
|                | 1  | 0.011699000  | 0.710205000  | -1.902074000 |
|                | 1  | 0.703565000  | 2.530946000  | 1.730000000  |
| <b>INT-3-1</b> | 6  | -2.926819000 | -0.501365000 | 0.359567000  |
|                | 6  | -1.807610000 | -0.303846000 | -0.462246000 |
|                | 6  | -1.688340000 | -1.054789000 | -1.634940000 |
|                | 6  | -2.691846000 | -1.963387000 | -1.988860000 |
|                | 6  | -3.810146000 | -2.133708000 | -1.165411000 |
|                | 6  | -3.933352000 | -1.407027000 | 0.024050000  |
|                | 6  | -1.309220000 | 1.183852000  | 1.454482000  |
|                | 6  | -0.831498000 | 0.767311000  | 0.011831000  |
|                | 1  | -0.811833000 | -0.941074000 | -2.266072000 |
|                | 1  | -2.596041000 | -2.542917000 | -2.902624000 |
|                | 1  | -4.586761000 | -2.841702000 | -1.441329000 |
|                | 1  | -4.792617000 | -1.551635000 | 0.672448000  |

|      |    |              |              |              |
|------|----|--------------|--------------|--------------|
|      | 16 | -2.907737000 | 0.469230000  | 1.858337000  |
|      | 8  | -0.705933000 | 1.916860000  | 2.201878000  |
|      | 6  | 2.407239000  | -0.898887000 | 0.631489000  |
|      | 6  | 2.824950000  | 0.130010000  | -0.263504000 |
|      | 6  | 4.184887000  | 0.214664000  | -0.619545000 |
|      | 6  | 5.080800000  | -0.708817000 | -0.086872000 |
|      | 6  | 4.643954000  | -1.721335000 | 0.797743000  |
|      | 6  | 3.304971000  | -1.830694000 | 1.168261000  |
|      | 6  | 0.597782000  | 0.308765000  | 0.060884000  |
|      | 6  | 1.648431000  | 0.883573000  | -0.611771000 |
|      | 1  | 4.530828000  | 0.989874000  | -1.299123000 |
|      | 1  | 6.133193000  | -0.653290000 | -0.353297000 |
|      | 1  | 5.365989000  | -2.428805000 | 1.197279000  |
|      | 1  | 2.970211000  | -2.609773000 | 1.848265000  |
|      | 7  | 1.045451000  | -0.764069000 | 0.815190000  |
|      | 1  | 0.471515000  | -1.381275000 | 1.373304000  |
|      | 6  | 1.460008000  | 2.051403000  | -1.534366000 |
|      | 1  | 1.746494000  | 2.993523000  | -1.044920000 |
|      | 1  | 2.089108000  | 1.954095000  | -2.428196000 |
|      | 6  | -0.012818000 | 2.108333000  | -1.953394000 |
|      | 7  | -0.886698000 | 2.029599000  | -0.767015000 |
|      | 1  | -1.852000000 | 2.199753000  | -1.041953000 |
|      | 1  | -0.217744000 | 1.306605000  | -2.681183000 |
|      | 1  | -0.238590000 | 3.061008000  | -2.442611000 |
| TS-4 | 6  | -2.536225000 | -0.928938000 | 0.222392000  |
|      | 6  | -2.056268000 | 0.249217000  | -0.419168000 |
|      | 6  | -2.790390000 | 0.790061000  | -1.497582000 |
|      | 6  | -3.958446000 | 0.194806000  | -1.960579000 |
|      | 6  | -4.435292000 | -0.958421000 | -1.324415000 |
|      | 6  | -3.740429000 | -1.496717000 | -0.246418000 |
|      | 6  | -0.909997000 | 0.289843000  | 2.130953000  |
|      | 6  | -0.814452000 | 0.972232000  | -0.038460000 |
|      | 1  | -2.406686000 | 1.673426000  | -2.000540000 |
|      | 1  | -4.485799000 | 0.620074000  | -2.809656000 |
|      | 1  | -5.351331000 | -1.434435000 | -1.664781000 |
|      | 1  | -4.125478000 | -2.378653000 | 0.257340000  |
|      | 16 | -1.744025000 | -1.662923000 | 1.618982000  |
|      | 8  | -0.345072000 | 0.440860000  | 3.146576000  |
|      | 6  | 2.187074000  | -1.051143000 | -0.538066000 |
|      | 6  | 2.764998000  | 0.224632000  | -0.244997000 |
|      | 6  | 4.170740000  | 0.353560000  | -0.221872000 |
|      | 6  | 4.950263000  | -0.766777000 | -0.476677000 |
|      | 6  | 4.356833000  | -2.022319000 | -0.759717000 |
|      | 6  | 2.975931000  | -2.182146000 | -0.797119000 |

|              |    |              |              |              |
|--------------|----|--------------|--------------|--------------|
|              | 6  | 0.512819000  | 0.396428000  | -0.193863000 |
|              | 6  | 1.678298000  | 1.126873000  | -0.032457000 |
|              | 1  | 4.633455000  | 1.313162000  | -0.006112000 |
|              | 1  | 6.033740000  | -0.684829000 | -0.460115000 |
|              | 1  | 4.996182000  | -2.879524000 | -0.953350000 |
|              | 1  | 2.523983000  | -3.145265000 | -1.017630000 |
|              | 7  | 0.818619000  | -0.912902000 | -0.519199000 |
|              | 1  | 0.151124000  | -1.672079000 | -0.553698000 |
|              | 6  | 1.611573000  | 2.576531000  | 0.344657000  |
|              | 1  | 1.596659000  | 2.685553000  | 1.439226000  |
|              | 1  | 2.480579000  | 3.134904000  | -0.018980000 |
|              | 6  | 0.343434000  | 3.185890000  | -0.266289000 |
|              | 7  | -0.834770000 | 2.320723000  | -0.081335000 |
|              | 1  | -1.736103000 | 2.775902000  | -0.010606000 |
|              | 1  | 0.490582000  | 3.342855000  | -1.343981000 |
|              | 1  | 0.114329000  | 4.152381000  | 0.188351000  |
|              | 6  | 2.472123000  | -0.898656000 | -0.566518000 |
|              | 6  | 2.145142000  | 0.270886000  | 0.187248000  |
|              | 6  | 3.026639000  | 0.774153000  | 1.172509000  |
|              | 6  | 4.206056000  | 0.110510000  | 1.483488000  |
|              | 6  | 4.518394000  | -1.072405000 | 0.791123000  |
|              | 6  | 3.675956000  | -1.557785000 | -0.200936000 |
|              | 6  | 0.885847000  | 1.003481000  | -0.009419000 |
|              | 1  | 2.749818000  | 1.668836000  | 1.725286000  |
|              | 1  | 4.862442000  | 0.491731000  | 2.260074000  |
|              | 1  | 5.433541000  | -1.611530000 | 1.025496000  |
|              | 1  | 3.947769000  | -2.457888000 | -0.745428000 |
|              | 16 | 1.528716000  | -1.453091000 | -1.937569000 |
|              | 6  | -2.110049000 | -0.976385000 | 0.487187000  |
|              | 6  | -2.673997000 | 0.262577000  | 0.038909000  |
|              | 6  | -4.076808000 | 0.378820000  | -0.094073000 |
|              | 6  | -4.866218000 | -0.719586000 | 0.205408000  |
|              | 6  | -4.286962000 | -1.940464000 | 0.641278000  |
|              | 6  | -2.914536000 | -2.086968000 | 0.791743000  |
|              | 6  | -0.422602000 | 0.441564000  | 0.118564000  |
|              | 6  | -1.584020000 | 1.150073000  | -0.177579000 |
|              | 1  | -4.523904000 | 1.311869000  | -0.426065000 |
|              | 1  | -5.946067000 | -0.652387000 | 0.107567000  |
|              | 1  | -4.936983000 | -2.782190000 | 0.864483000  |
|              | 1  | -2.478349000 | -3.022733000 | 1.128975000  |
|              | 7  | -0.748433000 | -0.830998000 | 0.554475000  |
|              | 1  | -0.084418000 | -1.587194000 | 0.655712000  |
|              | 6  | -1.499081000 | 2.557394000  | -0.689368000 |
|              | 1  | -1.478597000 | 2.555821000  | -1.789117000 |
| <b>INT-4</b> |    |              |              |              |

|  |    |              |              |              |
|--|----|--------------|--------------|--------------|
|  | 1  | -2.365041000 | 3.155372000  | -0.388560000 |
|  | 6  | -0.234119000 | 3.213975000  | -0.126592000 |
|  | 7  | 0.934150000  | 2.314253000  | -0.220138000 |
|  | 1  | 1.847229000  | 2.738591000  | -0.345387000 |
|  | 1  | -0.373546000 | 3.461778000  | 0.934322000  |
|  | 1  | 0.016032000  | 4.129478000  | -0.664453000 |
|  | 6  | 0.157565000  | 1.888215000  | 0.478697000  |
|  | 6  | -0.769394000 | 1.707844000  | -0.578445000 |
|  | 6  | -1.083491000 | 2.762733000  | -1.451315000 |
|  | 6  | -0.477029000 | 4.010389000  | -1.302998000 |
|  | 6  | 0.448102000  | 4.203591000  | -0.271125000 |
|  | 6  | 0.760556000  | 3.159513000  | 0.597552000  |
|  | 6  | -1.472671000 | 0.413691000  | -0.801594000 |
|  | 1  | -1.796578000 | 2.600175000  | -2.255938000 |
|  | 1  | -0.722564000 | 4.817681000  | -1.986616000 |
|  | 1  | 0.928301000  | 5.170311000  | -0.143148000 |
|  | 1  | 1.476877000  | 3.317022000  | 1.398443000  |
|  | 16 | 0.527610000  | 0.627901000  | 1.664289000  |
|  | 6  | -4.884949000 | 0.528587000  | 0.394626000  |
|  | 6  | -4.739893000 | -0.867641000 | 0.101598000  |
|  | 6  | -5.812522000 | -1.749210000 | 0.375863000  |
|  | 6  | -6.978440000 | -1.229470000 | 0.910018000  |
|  | 6  | -7.105330000 | 0.159887000  | 1.181131000  |
|  | 6  | -6.074104000 | 1.052756000  | 0.930001000  |
|  | 6  | -2.841338000 | 0.220844000  | -0.458684000 |
|  | 6  | -3.441031000 | -1.038116000 | -0.446166000 |
|  | 1  | -5.721099000 | -2.811015000 | 0.164966000  |
|  | 1  | -7.815136000 | -1.887695000 | 1.125736000  |
|  | 1  | -8.037068000 | 0.531572000  | 1.598713000  |
|  | 1  | -6.177485000 | 2.112645000  | 1.142653000  |
|  | 7  | -3.715628000 | 1.161571000  | 0.064856000  |
|  | 1  | -3.539793000 | 2.155379000  | 0.133041000  |
|  | 6  | -2.644535000 | -2.247188000 | -0.837486000 |
|  | 1  | -2.229246000 | -2.721667000 | 0.063698000  |
|  | 1  | -3.261963000 | -3.001555000 | -1.335064000 |
|  | 6  | -1.525754000 | -1.828544000 | -1.800687000 |
|  | 7  | -0.843287000 | -0.591531000 | -1.370377000 |
|  | 1  | -1.942065000 | -1.630484000 | -2.797461000 |
|  | 6  | 1.845924000  | -1.314811000 | 0.675506000  |
|  | 1  | 2.194518000  | -1.420469000 | 1.688501000  |
|  | 1  | 0.890116000  | -1.739080000 | 0.424890000  |
|  | 6  | 2.476393000  | -0.381368000 | -0.284985000 |
|  | 8  | 1.946804000  | -0.196869000 | -1.395281000 |
|  | 6  | 3.750100000  | 0.309600000  | 0.065458000  |

TS-5

|       |    |              |              |              |
|-------|----|--------------|--------------|--------------|
|       | 6  | 4.482281000  | 0.026062000  | 1.232816000  |
|       | 6  | 4.214516000  | 1.313192000  | -0.802739000 |
|       | 6  | 5.654232000  | 0.727608000  | 1.516547000  |
|       | 1  | 4.158083000  | -0.749304000 | 1.918147000  |
|       | 6  | 5.386381000  | 2.013214000  | -0.518487000 |
|       | 1  | 3.645655000  | 1.535392000  | -1.699573000 |
|       | 6  | 6.110489000  | 1.720983000  | 0.642686000  |
|       | 1  | 6.214080000  | 0.495629000  | 2.418303000  |
|       | 1  | 5.733289000  | 2.786809000  | -1.198166000 |
|       | 1  | 7.024021000  | 2.265095000  | 0.867440000  |
|       | 35 | 2.995869000  | -3.273357000 | -0.048291000 |
|       | 1  | 0.169411000  | -0.488544000 | -1.554999000 |
|       | 1  | -0.766941000 | -2.606315000 | -1.897813000 |
| INT-5 | 6  | -0.494399000 | -2.039116000 | 0.306572000  |
|       | 6  | 0.434590000  | -1.768489000 | -0.720174000 |
|       | 6  | 0.650798000  | -2.712321000 | -1.734956000 |
|       | 6  | -0.039969000 | -3.926332000 | -1.733918000 |
|       | 6  | -0.952093000 | -4.203033000 | -0.715116000 |
|       | 6  | -1.178334000 | -3.263104000 | 0.293668000  |
|       | 6  | 1.222741000  | -0.503898000 | -0.786681000 |
|       | 1  | 1.357882000  | -2.492125000 | -2.530029000 |
|       | 1  | 0.138356000  | -4.647261000 | -2.526046000 |
|       | 1  | -1.492765000 | -5.144936000 | -0.703225000 |
|       | 1  | -1.889915000 | -3.475954000 | 1.085187000  |
|       | 16 | -0.745155000 | -0.973077000 | 1.733897000  |
|       | 6  | 4.636029000  | -0.974635000 | 0.311314000  |
|       | 6  | 4.573238000  | 0.452729000  | 0.191413000  |
|       | 6  | 5.700448000  | 1.231071000  | 0.547872000  |
|       | 6  | 6.839630000  | 0.582866000  | 0.990137000  |
|       | 6  | 6.885522000  | -0.834675000 | 1.087476000  |
|       | 6  | 5.799401000  | -1.628875000 | 0.751317000  |
|       | 6  | 2.603443000  | -0.443992000 | -0.453819000 |
|       | 6  | 3.280986000  | 0.766868000  | -0.302585000 |
|       | 1  | 5.668568000  | 2.314042000  | 0.468847000  |
|       | 1  | 7.717706000  | 1.159242000  | 1.266729000  |
|       | 1  | 7.799089000  | -1.308417000 | 1.436065000  |
|       | 1  | 5.841832000  | -2.711026000 | 0.830876000  |
|       | 7  | 3.425775000  | -1.492949000 | -0.067060000 |
|       | 1  | 3.195992000  | -2.476406000 | -0.121971000 |
|       | 6  | 2.553250000  | 2.061194000  | -0.507273000 |
|       | 1  | 2.196567000  | 2.437267000  | 0.462944000  |
|       | 1  | 3.205903000  | 2.835897000  | -0.922155000 |
|       | 6  | 1.379380000  | 1.852068000  | -1.473019000 |
|       | 7  | 0.642487000  | 0.600336000  | -1.202028000 |

|                |    |              |              |              |
|----------------|----|--------------|--------------|--------------|
|                | 1  | 1.743666000  | 1.783387000  | -2.506945000 |
|                | 6  | -1.674985000 | 0.520920000  | 1.115969000  |
|                | 1  | -2.178010000 | 0.896773000  | 2.007893000  |
|                | 1  | -0.973514000 | 1.280680000  | 0.774784000  |
|                | 6  | -2.630085000 | 0.201514000  | -0.017791000 |
|                | 8  | -2.199161000 | 0.257211000  | -1.175755000 |
|                | 6  | -4.028816000 | -0.219663000 | 0.248914000  |
|                | 6  | -4.569558000 | -0.281502000 | 1.546435000  |
|                | 6  | -4.837321000 | -0.578693000 | -0.847713000 |
|                | 6  | -5.889623000 | -0.691026000 | 1.740344000  |
|                | 1  | -3.972917000 | -0.014985000 | 2.411838000  |
|                | 6  | -6.154429000 | -0.984121000 | -0.652198000 |
|                | 1  | -4.416021000 | -0.533392000 | -1.846512000 |
|                | 6  | -6.683522000 | -1.041486000 | 0.643935000  |
|                | 1  | -6.297269000 | -0.734997000 | 2.746144000  |
|                | 1  | -6.769550000 | -1.257354000 | -1.504935000 |
|                | 1  | -7.711556000 | -1.358298000 | 0.797592000  |
|                | 35 | -1.341978000 | 4.014886000  | -0.207862000 |
|                | 1  | -0.372484000 | 0.573126000  | -1.386856000 |
|                | 1  | 0.657680000  | 2.667940000  | -1.398475000 |
| <b>INT-5-1</b> | 6  | -0.771455000 | 2.740369000  | -0.259829000 |
|                | 6  | -2.091316000 | 2.491902000  | 0.171068000  |
|                | 6  | -2.822383000 | 3.505239000  | 0.814967000  |
|                | 6  | -2.227442000 | 4.738793000  | 1.076425000  |
|                | 6  | -0.906823000 | 4.973466000  | 0.678445000  |
|                | 6  | -0.188870000 | 3.988128000  | -0.000972000 |
|                | 6  | -2.726017000 | 1.159895000  | -0.013692000 |
|                | 1  | -3.840748000 | 3.309675000  | 1.138899000  |
|                | 1  | -2.791052000 | 5.511410000  | 1.590503000  |
|                | 1  | -0.441448000 | 5.935026000  | 0.875674000  |
|                | 1  | 0.818665000  | 4.191836000  | -0.350760000 |
|                | 16 | 0.044085000  | 1.494325000  | -1.251568000 |
|                | 6  | -1.219065000 | -1.442214000 | 1.996163000  |
|                | 6  | -2.080849000 | -2.208832000 | 1.145164000  |
|                | 6  | -2.094470000 | -3.619313000 | 1.257408000  |
|                | 6  | -1.277081000 | -4.216753000 | 2.199844000  |
|                | 6  | -0.436343000 | -3.436966000 | 3.039777000  |
|                | 6  | -0.395555000 | -2.052829000 | 2.956634000  |
|                | 6  | -2.320826000 | -0.011221000 | 0.679686000  |
|                | 6  | -2.776140000 | -1.283473000 | 0.327563000  |
|                | 1  | -2.737175000 | -4.217501000 | 0.617745000  |
|                | 1  | -1.270828000 | -5.297877000 | 2.304267000  |
|                | 1  | 0.193429000  | -3.941352000 | 3.767551000  |
|                | 1  | 0.252534000  | -1.465392000 | 3.599947000  |

|             |    |              |              |              |
|-------------|----|--------------|--------------|--------------|
|             | 7  | -1.368537000 | -0.116500000 | 1.682176000  |
|             | 1  | -0.941360000 | 0.655850000  | 2.175930000  |
|             | 6  | -3.732060000 | -1.441259000 | -0.814385000 |
|             | 1  | -3.164594000 | -1.618410000 | -1.739313000 |
|             | 1  | -4.397347000 | -2.299036000 | -0.676499000 |
|             | 6  | -4.590062000 | -0.175460000 | -0.925970000 |
|             | 7  | -3.767618000 | 1.049588000  | -0.822710000 |
|             | 1  | -5.327407000 | -0.139433000 | -0.113061000 |
|             | 6  | 1.572112000  | 1.286279000  | -0.373595000 |
|             | 1  | 1.620861000  | 1.744424000  | 0.607051000  |
|             | 6  | 2.600735000  | 0.551453000  | -0.852623000 |
|             | 8  | 2.538473000  | -0.116887000 | -2.049098000 |
|             | 6  | 3.895655000  | 0.413587000  | -0.146653000 |
|             | 6  | 4.375063000  | 1.402221000  | 0.734470000  |
|             | 6  | 4.682559000  | -0.734075000 | -0.358148000 |
|             | 6  | 5.591763000  | 1.237201000  | 1.397564000  |
|             | 1  | 3.806361000  | 2.315525000  | 0.885593000  |
|             | 6  | 5.904146000  | -0.893229000 | 0.300119000  |
|             | 1  | 4.328172000  | -1.499174000 | -1.040950000 |
|             | 6  | 6.363380000  | 0.088558000  | 1.183948000  |
|             | 1  | 5.945977000  | 2.014479000  | 2.069942000  |
|             | 1  | 6.495633000  | -1.788428000 | 0.124873000  |
|             | 1  | 7.314830000  | -0.034532000 | 1.694700000  |
|             | 1  | -4.061787000 | 1.869450000  | -1.344079000 |
|             | 1  | 1.704164000  | -0.655098000 | -2.131698000 |
|             | 35 | 0.073767000  | -2.180991000 | -2.258782000 |
|             | 1  | -5.120735000 | -0.131285000 | -1.877619000 |
| <b>TS-6</b> | 6  | -1.399241000 | 2.255089000  | -1.020057000 |
|             | 6  | -0.875299000 | 2.093759000  | 0.265856000  |
|             | 6  | -0.868694000 | 3.184975000  | 1.145014000  |
|             | 6  | -1.374049000 | 4.421252000  | 0.737456000  |
|             | 6  | -1.882620000 | 4.573108000  | -0.558322000 |
|             | 6  | -1.897955000 | 3.492927000  | -1.443024000 |
|             | 6  | -0.217660000 | 0.783698000  | 0.668838000  |
|             | 1  | -0.455271000 | 3.066073000  | 2.143211000  |
|             | 1  | -1.368496000 | 5.261145000  | 1.425946000  |
|             | 1  | -2.278347000 | 5.532717000  | -0.879366000 |
|             | 1  | -2.309697000 | 3.606494000  | -2.442142000 |
|             | 16 | -1.437934000 | 0.808612000  | -2.059852000 |
|             | 6  | 3.274427000  | 1.038181000  | -0.425595000 |
|             | 6  | 3.426999000  | 0.216536000  | 0.731999000  |
|             | 6  | 4.713154000  | -0.234742000 | 1.090170000  |
|             | 6  | 5.799434000  | 0.147610000  | 0.311302000  |
|             | 6  | 5.627357000  | 0.975871000  | -0.823475000 |



|              |    |              |              |              |
|--------------|----|--------------|--------------|--------------|
|              | 6  | 4.369028000  | 1.433583000  | -1.205669000 |
|              | 6  | 1.246603000  | 0.749197000  | 0.491576000  |
|              | 6  | 2.119975000  | 0.043303000  | 1.290712000  |
|              | 1  | 4.852702000  | -0.870481000 | 1.960924000  |
|              | 1  | 6.797737000  | -0.192673000 | 0.573417000  |
|              | 1  | 6.496615000  | 1.260235000  | -1.410682000 |
|              | 1  | 4.240605000  | 2.067645000  | -2.078821000 |
|              | 7  | 1.932930000  | 1.329183000  | -0.563341000 |
|              | 1  | 1.548784000  | 1.998548000  | -1.217011000 |
|              | 6  | 1.618045000  | -0.744187000 | 2.460797000  |
|              | 1  | 1.410172000  | -1.780665000 | 2.161406000  |
|              | 1  | 2.358178000  | -0.786016000 | 3.267868000  |
|              | 6  | 0.350038000  | -0.066185000 | 2.987217000  |
|              | 7  | -0.598610000 | 0.257506000  | 1.903897000  |
|              | 1  | 0.630825000  | 0.853999000  | 3.522260000  |
|              | 6  | -0.815455000 | -0.324542000 | -0.800934000 |
|              | 1  | 0.133737000  | -0.757496000 | -1.110101000 |
|              | 6  | -1.682665000 | -1.357613000 | -0.279681000 |
|              | 8  | -1.120486000 | -2.453592000 | 0.142801000  |
|              | 6  | -3.124113000 | -1.303929000 | -0.053083000 |
|              | 6  | -3.842000000 | -0.091630000 | 0.031856000  |
|              | 6  | -3.820508000 | -2.524019000 | 0.113850000  |
|              | 6  | -5.211160000 | -0.103698000 | 0.287925000  |
|              | 1  | -3.338270000 | 0.860449000  | -0.066388000 |
|              | 6  | -5.192333000 | -2.528112000 | 0.341441000  |
|              | 1  | -3.278887000 | -3.460381000 | 0.043150000  |
|              | 6  | -5.891029000 | -1.317726000 | 0.432302000  |
|              | 1  | -5.748512000 | 0.836332000  | 0.369672000  |
|              | 1  | -5.717962000 | -3.472038000 | 0.450711000  |
|              | 1  | -6.961731000 | -1.321159000 | 0.616472000  |
|              | 1  | -1.501410000 | 0.575967000  | 2.235462000  |
|              | 1  | -0.174945000 | -0.717922000 | 3.691020000  |
|              | 35 | 1.735425000  | -2.950744000 | -0.895152000 |
|              | 1  | -0.146776000 | -2.576835000 | -0.166194000 |
| <b>INT-6</b> | 6  | -1.380971000 | 2.180494000  | -1.251063000 |
|              | 6  | -0.762429000 | 2.071788000  | -0.000264000 |
|              | 6  | -0.629002000 | 3.216203000  | 0.793360000  |
|              | 6  | -1.126293000 | 4.442052000  | 0.342595000  |
|              | 6  | -1.748335000 | 4.532147000  | -0.909269000 |
|              | 6  | -1.877726000 | 3.401272000  | -1.719204000 |
|              | 6  | -0.242121000 | 0.677825000  | 0.375828000  |
|              | 1  | -0.133674000 | 3.157164000  | 1.757879000  |
|              | 1  | -1.025352000 | 5.326118000  | 0.965429000  |
|              | 1  | -2.133570000 | 5.486315000  | -1.258028000 |

|                |    |              |              |              |
|----------------|----|--------------|--------------|--------------|
|                | 1  | -2.360338000 | 3.468879000  | -2.690083000 |
|                | 16 | -1.448375000 | 0.659099000  | -2.177898000 |
|                | 6  | 3.372455000  | 0.815890000  | -0.351107000 |
|                | 6  | 3.414590000  | 0.291129000  | 0.974288000  |
|                | 6  | 4.663765000  | 0.002092000  | 1.556115000  |
|                | 6  | 5.821862000  | 0.244848000  | 0.822134000  |
|                | 6  | 5.756770000  | 0.774637000  | -0.486859000 |
|                | 6  | 4.534999000  | 1.068447000  | -1.089656000 |
|                | 6  | 1.259750000  | 0.638806000  | 0.397706000  |
|                | 6  | 2.052367000  | 0.184915000  | 1.424002000  |
|                | 1  | 4.723485000  | -0.405297000 | 2.562471000  |
|                | 1  | 6.792578000  | 0.025393000  | 1.259233000  |
|                | 1  | 6.677492000  | 0.955956000  | -1.035381000 |
|                | 1  | 4.486485000  | 1.473215000  | -2.097213000 |
|                | 7  | 2.046315000  | 1.011376000  | -0.679788000 |
|                | 1  | 1.716519000  | 1.439699000  | -1.534368000 |
|                | 6  | 1.471171000  | -0.292808000 | 2.718819000  |
|                | 1  | 1.397598000  | -1.389700000 | 2.739872000  |
|                | 1  | 2.098482000  | -0.000716000 | 3.569950000  |
|                | 6  | 0.083129000  | 0.330349000  | 2.879783000  |
|                | 7  | -0.736224000 | 0.135073000  | 1.664381000  |
|                | 1  | 0.194980000  | 1.395053000  | 3.135801000  |
|                | 6  | -0.765787000 | -0.315293000 | -0.770912000 |
|                | 1  | 0.093080000  | -0.858486000 | -1.165534000 |
|                | 6  | -1.706115000 | -1.379195000 | -0.224671000 |
|                | 8  | -1.242364000 | -2.572276000 | -0.155924000 |
|                | 6  | -3.105552000 | -1.229988000 | 0.150390000  |
|                | 6  | -3.752285000 | 0.024468000  | 0.208605000  |
|                | 6  | -3.841745000 | -2.393572000 | 0.477920000  |
|                | 6  | -5.085222000 | 0.111052000  | 0.595494000  |
|                | 1  | -3.225906000 | 0.937049000  | -0.039112000 |
|                | 6  | -5.177549000 | -2.300999000 | 0.849479000  |
|                | 1  | -3.358843000 | -3.362444000 | 0.431365000  |
|                | 6  | -5.801526000 | -1.048880000 | 0.913503000  |
|                | 1  | -5.567458000 | 1.082369000  | 0.643961000  |
|                | 1  | -5.732958000 | -3.201391000 | 1.093372000  |
|                | 1  | -6.844663000 | -0.977320000 | 1.208181000  |
|                | 1  | -1.670247000 | 0.495795000  | 1.843708000  |
|                | 1  | -0.465306000 | -0.147451000 | 3.697583000  |
|                | 35 | 1.598839000  | -3.042213000 | -1.070917000 |
|                | 1  | -0.248650000 | -2.701324000 | -0.467482000 |
| <b>INT-6-1</b> | 6  | -1.322667000 | 3.171274000  | 0.068481000  |
|                | 6  | -1.912218000 | 2.066523000  | -0.565124000 |
|                | 6  | -3.233153000 | 2.159763000  | -1.017559000 |

|    |              |              |              |
|----|--------------|--------------|--------------|
| 6  | -3.928434000 | 3.364596000  | -0.892419000 |
| 6  | -3.314575000 | 4.470379000  | -0.289769000 |
| 6  | -2.012697000 | 4.379621000  | 0.206159000  |
| 6  | -1.031265000 | 0.823463000  | -0.610017000 |
| 1  | -3.733699000 | 1.295902000  | -1.443206000 |
| 1  | -4.950563000 | 3.436191000  | -1.251607000 |
| 1  | -3.859729000 | 5.404747000  | -0.188816000 |
| 1  | -1.548402000 | 5.229303000  | 0.697931000  |
| 16 | 0.300016000  | 2.872394000  | 0.707282000  |
| 6  | -2.654611000 | -1.734795000 | 1.490694000  |
| 6  | -2.808433000 | -2.352970000 | 0.216515000  |
| 6  | -3.464332000 | -3.595989000 | 0.132572000  |
| 6  | -3.943650000 | -4.183188000 | 1.300278000  |
| 6  | -3.780606000 | -3.551565000 | 2.554391000  |
| 6  | -3.136024000 | -2.321676000 | 2.667802000  |
| 6  | -1.716839000 | -0.395881000 | -0.049165000 |
| 6  | -2.205025000 | -1.472446000 | -0.750016000 |
| 1  | -3.594252000 | -4.089939000 | -0.827155000 |
| 1  | -4.452015000 | -5.142507000 | 1.250369000  |
| 1  | -4.165545000 | -4.034482000 | 3.448693000  |
| 1  | -3.011799000 | -1.836539000 | 3.632293000  |
| 7  | -1.987532000 | -0.540936000 | 1.296874000  |
| 1  | -1.719270000 | 0.106301000  | 2.025577000  |
| 6  | -2.039176000 | -1.645578000 | -2.230552000 |
| 1  | -1.259163000 | -2.388100000 | -2.450786000 |
| 1  | -2.958557000 | -2.018381000 | -2.697382000 |
| 6  | -1.689915000 | -0.311907000 | -2.891495000 |
| 7  | -0.656015000 | 0.427636000  | -2.071694000 |
| 1  | -2.555411000 | 0.343518000  | -2.981982000 |
| 6  | 0.286628000  | 1.200183000  | 0.072039000  |
| 6  | 1.349254000  | 0.365061000  | 0.142910000  |
| 8  | 1.208638000  | -0.880866000 | -0.400176000 |
| 6  | 2.641001000  | 0.683242000  | 0.805193000  |
| 6  | 3.451234000  | 1.736683000  | 0.356352000  |
| 6  | 3.064325000  | -0.098830000 | 1.893508000  |
| 6  | 4.670269000  | 2.003346000  | 0.985576000  |
| 1  | 3.140107000  | 2.330207000  | -0.498761000 |
| 6  | 4.276464000  | 0.177709000  | 2.527297000  |
| 1  | 2.440849000  | -0.916671000 | 2.244865000  |
| 6  | 5.083156000  | 1.227328000  | 2.072940000  |
| 1  | 5.297996000  | 2.812491000  | 0.622115000  |
| 1  | 4.593482000  | -0.428376000 | 3.371727000  |
| 1  | 6.030840000  | 1.436147000  | 2.562158000  |
| 1  | -0.362979000 | 1.276910000  | -2.564101000 |

|      |              |              |              |              |
|------|--------------|--------------|--------------|--------------|
|      | 1            | 2.101770000  | -1.282790000 | -0.627982000 |
|      | 35           | 3.882915000  | -2.171993000 | -1.438273000 |
|      | 1            | 0.178467000  | -0.173202000 | -1.973164000 |
|      | 1            | -1.250955000 | -0.445333000 | -3.882145000 |
| TS-7 | 6            | 1.421186000  | 3.302725000  | -0.329918000 |
|      | 6            | 2.073994000  | 2.077487000  | -0.071239000 |
|      | 6            | 3.480800000  | 2.021012000  | -0.094384000 |
|      | 6            | 4.206110000  | 3.176821000  | -0.355008000 |
|      | 6            | 3.539966000  | 4.395403000  | -0.592810000 |
|      | 6            | 2.148688000  | 4.470975000  | -0.586363000 |
|      | 6            | 1.155237000  | 0.978472000  | 0.201665000  |
|      | 1            | 3.986614000  | 1.076444000  | 0.083540000  |
|      | 1            | 5.291138000  | 3.142604000  | -0.377459000 |
|      | 1            | 4.119062000  | 5.291597000  | -0.797584000 |
|      | 1            | 1.643593000  | 5.411337000  | -0.785218000 |
|      | 16           | -0.325662000 | 3.157784000  | -0.315589000 |
|      | 6            | 2.118975000  | -2.191980000 | -1.313757000 |
|      | 6            | 2.449851000  | -2.521017000 | 0.029664000  |
|      | 6            | 2.977150000  | -3.797130000 | 0.309376000  |
|      | 6            | 3.161694000  | -4.694686000 | -0.738752000 |
|      | 6            | 2.828981000  | -4.343177000 | -2.067327000 |
|      | 6            | 2.306558000  | -3.088856000 | -2.373964000 |
|      | 6            | 1.623554000  | -0.419238000 | -0.006321000 |
|      | 6            | 2.135914000  | -1.374820000 | 0.847625000  |
|      | 1            | 3.235704000  | -4.080009000 | 1.326847000  |
|      | 1            | 3.566321000  | -5.682901000 | -0.535817000 |
|      | 1            | 2.983249000  | -5.065201000 | -2.865001000 |
|      | 1            | 2.049473000  | -2.817998000 | -3.394569000 |
|      | 7            | 1.630972000  | -0.905400000 | -1.307907000 |
|      | 1            | 1.280879000  | -0.406767000 | -2.114540000 |
|      | 6            | 2.288574000  | -1.308452000 | 2.341516000  |
|      | 1            | 1.451892000  | -1.832389000 | 2.829632000  |
|      | 1            | 3.195585000  | -1.842990000 | 2.649401000  |
|      | 6            | 2.368043000  | 0.119340000  | 2.879137000  |
|      | 7            | 1.238611000  | 0.901122000  | 2.358753000  |
|      | 1            | 3.287149000  | 0.610412000  | 2.543269000  |
|      | 6            | -0.204260000 | 1.392672000  | -0.029610000 |
|      | 6            | -1.326587000 | 0.569387000  | -0.054352000 |
|      | 8            | -1.144749000 | -0.727715000 | 0.113826000  |
|      | 6            | -2.701797000 | 1.057976000  | -0.307453000 |
|      | 6            | -3.239985000 | 2.146287000  | 0.401680000  |
|      | 6            | -3.491620000 | 0.397870000  | -1.267389000 |
| 6    | -4.545938000 | 2.569223000  | 0.148884000  |              |
| 1    | -2.656538000 | 2.639723000  | 1.172635000  |              |

|       |    |              |              |              |
|-------|----|--------------|--------------|--------------|
|       | 6  | -4.786754000 | 0.840658000  | -1.531110000 |
|       | 1  | -3.086630000 | -0.447309000 | -1.814483000 |
|       | 6  | -5.316729000 | 1.925726000  | -0.824545000 |
|       | 1  | -4.959913000 | 3.399589000  | 0.713698000  |
|       | 1  | -5.384332000 | 0.335522000  | -2.284551000 |
|       | 1  | -6.329691000 | 2.263024000  | -1.026267000 |
|       | 1  | 1.276358000  | 1.880098000  | 2.639553000  |
|       | 1  | 0.338564000  | 0.519867000  | 2.652126000  |
|       | 1  | -1.999095000 | -1.261920000 | 0.241357000  |
|       | 35 | -3.468906000 | -2.689640000 | 0.693069000  |
|       | 1  | 2.374216000  | 0.115733000  | 3.977431000  |
| INT-7 | 6  | 2.358867000  | 2.936342000  | -0.411411000 |
|       | 6  | 0.949290000  | 2.800620000  | -0.351596000 |
|       | 6  | 0.161052000  | 3.965936000  | -0.225563000 |
|       | 6  | 0.778601000  | 5.205383000  | -0.144614000 |
|       | 6  | 2.185408000  | 5.316325000  | -0.189561000 |
|       | 6  | 2.985828000  | 4.188397000  | -0.331625000 |
|       | 6  | 0.512010000  | 1.427920000  | -0.497492000 |
|       | 1  | -0.921602000 | 3.884272000  | -0.206066000 |
|       | 1  | 0.173992000  | 6.103016000  | -0.051137000 |
|       | 1  | 2.649880000  | 6.296052000  | -0.120862000 |
|       | 1  | 4.067242000  | 4.274710000  | -0.379644000 |
|       | 16 | 3.144820000  | 1.392378000  | -0.630795000 |
|       | 6  | -2.886815000 | 0.273052000  | -1.180757000 |
|       | 6  | -3.083618000 | 0.756450000  | 0.144189000  |
|       | 6  | -4.377682000 | 0.696079000  | 0.701303000  |
|       | 6  | -5.413430000 | 0.150673000  | -0.050447000 |
|       | 6  | -5.189009000 | -0.336377000 | -1.360673000 |
|       | 6  | -3.925601000 | -0.282451000 | -1.941725000 |
|       | 6  | -0.911207000 | 1.049143000  | -0.416654000 |
|       | 6  | -1.814473000 | 1.245670000  | 0.620435000  |
|       | 1  | -4.564027000 | 1.061315000  | 1.708117000  |
|       | 1  | -6.414106000 | 0.098214000  | 0.371224000  |
|       | 1  | -6.017899000 | -0.759871000 | -1.922150000 |
|       | 1  | -3.749943000 | -0.651270000 | -2.949058000 |
|       | 7  | -1.568770000 | 0.482340000  | -1.502154000 |
|       | 1  | -1.077876000 | 0.058103000  | -2.277559000 |
|       | 6  | -1.529496000 | 1.806721000  | 1.989463000  |
|       | 1  | -0.847218000 | 2.661243000  | 1.914396000  |
|       | 1  | -2.458998000 | 2.203495000  | 2.420544000  |
|       | 6  | -0.902362000 | 0.821101000  | 2.997053000  |
|       | 1  | -0.022367000 | 0.350474000  | 2.543808000  |
|       | 7  | -1.832426000 | -0.251316000 | 3.385618000  |
|       | 1  | -1.356614000 | -0.911090000 | 4.000007000  |

|                |    |              |              |              |
|----------------|----|--------------|--------------|--------------|
|                | 6  | 2.785356000  | -3.023372000 | -0.944088000 |
|                | 6  | 3.692666000  | -3.928915000 | -0.399703000 |
|                | 6  | 4.322998000  | -3.641753000 | 0.817878000  |
|                | 6  | 4.048763000  | -2.443686000 | 1.485680000  |
|                | 6  | 3.158497000  | -1.522487000 | 0.932728000  |
|                | 6  | 2.513452000  | -1.808007000 | -0.285308000 |
|                | 1  | 2.292014000  | -3.237518000 | -1.887009000 |
|                | 1  | 3.909788000  | -4.857022000 | -0.920741000 |
|                | 1  | 5.025606000  | -4.352023000 | 1.245195000  |
|                | 1  | 4.528017000  | -2.226482000 | 2.435912000  |
|                | 1  | 2.939448000  | -0.602622000 | 1.464655000  |
|                | 6  | 1.519066000  | -0.887603000 | -0.887614000 |
|                | 8  | 0.596526000  | -1.343901000 | -1.596439000 |
|                | 6  | 1.586031000  | 0.565402000  | -0.668338000 |
|                | 1  | -2.597883000 | 0.139566000  | 3.935291000  |
|                | 1  | -0.375169000 | -2.498439000 | -0.868862000 |
|                | 35 | -1.344610000 | -3.244820000 | -0.029919000 |
|                | 1  | -0.547054000 | 1.407200000  | 3.861710000  |
| <b>INT-7-1</b> | 6  | -2.377646000 | 2.886258000  | 0.213958000  |
|                | 6  | -1.125289000 | 2.367224000  | 0.625357000  |
|                | 6  | -0.071442000 | 3.270673000  | 0.884066000  |
|                | 6  | -0.277660000 | 4.632705000  | 0.713856000  |
|                | 6  | -1.528016000 | 5.126580000  | 0.285362000  |
|                | 6  | -2.588830000 | 4.261593000  | 0.039286000  |
|                | 6  | -1.142276000 | 0.923766000  | 0.775558000  |
|                | 1  | 0.887713000  | 2.898362000  | 1.231227000  |
|                | 1  | 0.531687000  | 5.328133000  | 0.917397000  |
|                | 1  | -1.668167000 | 6.195880000  | 0.153998000  |
|                | 1  | -3.555757000 | 4.641943000  | -0.276845000 |
|                | 16 | -3.560164000 | 1.616142000  | 0.006609000  |
|                | 6  | 1.337831000  | -1.171619000 | 2.455127000  |
|                | 6  | 2.149342000  | -0.700641000 | 1.382749000  |
|                | 6  | 3.502507000  | -1.102280000 | 1.322915000  |
|                | 6  | 3.992550000  | -1.954292000 | 2.307707000  |
|                | 6  | 3.164360000  | -2.418830000 | 3.356097000  |
|                | 6  | 1.829918000  | -2.033532000 | 3.445620000  |
|                | 6  | 0.062920000  | 0.163888000  | 1.156419000  |
|                | 6  | 1.317985000  | 0.144947000  | 0.559379000  |
|                | 1  | 4.158487000  | -0.751320000 | 0.528898000  |
|                | 1  | 5.032506000  | -2.268846000 | 2.274369000  |
|                | 1  | 3.578356000  | -3.085265000 | 4.108315000  |
|                | 1  | 1.193609000  | -2.383393000 | 4.254224000  |
|                | 7  | 0.090427000  | -0.616064000 | 2.301796000  |
|                | 1  | -0.755719000 | -0.914685000 | 2.771847000  |

|             |    |              |              |              |
|-------------|----|--------------|--------------|--------------|
|             | 6  | 1.723060000  | 0.795927000  | -0.736988000 |
|             | 1  | 1.153553000  | 1.714620000  | -0.906817000 |
|             | 1  | 2.779615000  | 1.086173000  | -0.706570000 |
|             | 6  | 1.485589000  | -0.076996000 | -1.978489000 |
|             | 1  | 0.449263000  | -0.413423000 | -2.044021000 |
|             | 7  | 2.354089000  | -1.306445000 | -1.955953000 |
|             | 1  | 2.157000000  | -1.923955000 | -2.748609000 |
|             | 6  | -4.576200000 | -2.681431000 | 0.006066000  |
|             | 6  | -5.403318000 | -3.303825000 | -0.926399000 |
|             | 6  | -5.378631000 | -2.896513000 | -2.266720000 |
|             | 6  | -4.527923000 | -1.862447000 | -2.669309000 |
|             | 6  | -3.712780000 | -1.222548000 | -1.733195000 |
|             | 6  | -3.729814000 | -1.627923000 | -0.386690000 |
|             | 1  | -4.583010000 | -2.994387000 | 1.045560000  |
|             | 1  | -6.066206000 | -4.105376000 | -0.612627000 |
|             | 1  | -6.019899000 | -3.386289000 | -2.994601000 |
|             | 1  | -4.498049000 | -1.553806000 | -3.710450000 |
|             | 1  | -3.047037000 | -0.428663000 | -2.056202000 |
|             | 6  | -2.827009000 | -1.021955000 | 0.633711000  |
|             | 8  | -2.454936000 | -1.680486000 | 1.610887000  |
|             | 6  | -2.387329000 | 0.391440000  | 0.492629000  |
|             | 1  | 3.368632000  | -1.022543000 | -2.005010000 |
|             | 35 | 5.341759000  | 0.012986000  | -2.011394000 |
|             | 1  | 1.748287000  | 0.463490000  | -2.890539000 |
|             | 1  | 2.212685000  | -1.849008000 | -1.096929000 |
| <b>TS-8</b> | 6  | -0.708197000 | 3.638556000  | -0.340359000 |
|             | 6  | -1.660534000 | 2.588588000  | -0.381557000 |
|             | 6  | -3.030921000 | 2.908751000  | -0.502073000 |
|             | 6  | -3.411588000 | 4.238476000  | -0.600333000 |
|             | 6  | -2.447413000 | 5.270580000  | -0.569027000 |
|             | 6  | -1.093574000 | 4.983992000  | -0.434440000 |
|             | 6  | -1.049901000 | 1.287646000  | -0.261166000 |
|             | 1  | -3.772827000 | 2.115817000  | -0.520137000 |
|             | 1  | -4.462964000 | 4.492630000  | -0.699427000 |
|             | 1  | -2.767799000 | 6.305759000  | -0.646457000 |
|             | 1  | -0.356215000 | 5.780489000  | -0.401931000 |
|             | 16 | 0.916599000  | 3.030879000  | -0.132135000 |
|             | 6  | -3.260516000 | -1.608304000 | -0.618852000 |
|             | 6  | -2.884832000 | -1.760117000 | 0.747255000  |
|             | 6  | -3.431420000 | -2.826645000 | 1.489364000  |
|             | 6  | -4.309934000 | -3.704447000 | 0.861723000  |
|             | 6  | -4.659242000 | -3.539656000 | -0.498956000 |
|             | 6  | -4.141416000 | -2.492140000 | -1.256527000 |
|             | 6  | -1.820913000 | 0.047029000  | -0.102132000 |

|              |    |              |              |              |
|--------------|----|--------------|--------------|--------------|
|              | 6  | -1.969673000 | -0.691756000 | 1.059156000  |
|              | 1  | -3.168923000 | -2.965474000 | 2.535343000  |
|              | 1  | -4.735882000 | -4.532044000 | 1.423037000  |
|              | 1  | -5.346734000 | -4.242668000 | -0.962025000 |
|              | 1  | -4.412583000 | -2.362317000 | -2.300872000 |
|              | 7  | -2.616760000 | -0.488713000 | -1.101969000 |
|              | 1  | -2.623972000 | -0.178755000 | -2.064247000 |
|              | 6  | -1.306962000 | -0.375621000 | 2.370489000  |
|              | 1  | -1.109074000 | 0.700385000  | 2.418893000  |
|              | 1  | -1.979550000 | -0.606762000 | 3.205328000  |
|              | 6  | 0.019806000  | -1.129827000 | 2.605738000  |
|              | 1  | 0.605708000  | -0.618860000 | 3.375769000  |
|              | 7  | 0.828283000  | -1.204297000 | 1.374180000  |
|              | 1  | 1.752661000  | -1.587284000 | 1.574944000  |
|              | 6  | 3.733445000  | 0.269010000  | -0.826909000 |
|              | 6  | 5.061936000  | 0.556988000  | -0.509048000 |
|              | 6  | 5.386995000  | 1.078385000  | 0.745956000  |
|              | 6  | 4.377713000  | 1.326156000  | 1.685382000  |
|              | 6  | 3.049635000  | 1.052641000  | 1.369177000  |
|              | 6  | 2.717492000  | 0.510033000  | 0.113963000  |
|              | 1  | 3.486400000  | -0.116821000 | -1.810025000 |
|              | 1  | 5.840349000  | 0.373832000  | -1.243913000 |
|              | 1  | 6.422699000  | 1.294646000  | 0.992891000  |
|              | 1  | 4.626866000  | 1.729103000  | 2.662653000  |
|              | 1  | 2.270685000  | 1.231079000  | 2.104255000  |
|              | 6  | 1.302086000  | 0.279480000  | -0.265395000 |
|              | 8  | 1.014918000  | -0.566531000 | -1.227636000 |
|              | 6  | 0.324559000  | 1.364715000  | -0.136520000 |
|              | 1  | 0.392100000  | -1.855970000 | 0.721284000  |
|              | 1  | 1.626067000  | -1.387824000 | -1.241276000 |
|              | 35 | 2.540308000  | -3.233349000 | -1.043763000 |
|              | 1  | -0.183175000 | -2.147553000 | 2.967934000  |
| <b>INT-8</b> | 6  | -0.875322000 | 3.470133000  | -0.497644000 |
|              | 6  | -1.809828000 | 2.418954000  | -0.354169000 |
|              | 6  | -3.184556000 | 2.735237000  | -0.335682000 |
|              | 6  | -3.586270000 | 4.057019000  | -0.488462000 |
|              | 6  | -2.638058000 | 5.086864000  | -0.651073000 |
|              | 6  | -1.275551000 | 4.804544000  | -0.649746000 |
|              | 6  | -1.165573000 | 1.119638000  | -0.208147000 |
|              | 1  | -3.925103000 | 1.953815000  | -0.197685000 |
|              | 1  | -4.645077000 | 4.299935000  | -0.477875000 |
|              | 1  | -2.972072000 | 6.113618000  | -0.771709000 |
|              | 1  | -0.541716000 | 5.597560000  | -0.760255000 |
|              | 16 | 0.767159000  | 2.879893000  | -0.411299000 |



|             |    |              |              |              |
|-------------|----|--------------|--------------|--------------|
|             | 6  | -3.611881000 | -1.598203000 | -0.317924000 |
|             | 6  | -2.891171000 | -1.990894000 | 0.846230000  |
|             | 6  | -3.298664000 | -3.143763000 | 1.547247000  |
|             | 6  | -4.388502000 | -3.866950000 | 1.074569000  |
|             | 6  | -5.084420000 | -3.463023000 | -0.089004000 |
|             | 6  | -4.708202000 | -2.326527000 | -0.799499000 |
|             | 6  | -1.947337000 | -0.105499000 | 0.003289000  |
|             | 6  | -1.842811000 | -1.024125000 | 1.036538000  |
|             | 1  | -2.769488000 | -3.465642000 | 2.440701000  |
|             | 1  | -4.712849000 | -4.758576000 | 1.604557000  |
|             | 1  | -5.931272000 | -4.050192000 | -0.434128000 |
|             | 1  | -5.244592000 | -2.014667000 | -1.691495000 |
|             | 7  | -3.028116000 | -0.445387000 | -0.797827000 |
|             | 1  | -3.269990000 | 0.012871000  | -1.665873000 |
|             | 6  | -0.764884000 | -0.990262000 | 2.078162000  |
|             | 1  | -0.578046000 | 0.044353000  | 2.386444000  |
|             | 1  | -1.065399000 | -1.536519000 | 2.978241000  |
|             | 6  | 0.538214000  | -1.629019000 | 1.571468000  |
|             | 1  | 1.400877000  | -1.377342000 | 2.188057000  |
|             | 7  | 0.849629000  | -1.244163000 | 0.150674000  |
|             | 1  | 1.605022000  | -1.882496000 | -0.201977000 |
|             | 6  | 3.828092000  | 0.585255000  | -0.114520000 |
|             | 6  | 4.962023000  | 0.951462000  | 0.616550000  |
|             | 6  | 4.851293000  | 1.311499000  | 1.961251000  |
|             | 6  | 3.592826000  | 1.324470000  | 2.570302000  |
|             | 6  | 2.460983000  | 0.958871000  | 1.840604000  |
|             | 6  | 2.567117000  | 0.567512000  | 0.495976000  |
|             | 1  | 3.938883000  | 0.324221000  | -1.159653000 |
|             | 1  | 5.932375000  | 0.955759000  | 0.127847000  |
|             | 1  | 5.734941000  | 1.594740000  | 2.526560000  |
|             | 1  | 3.487655000  | 1.624953000  | 3.608925000  |
|             | 1  | 1.489433000  | 1.011591000  | 2.322462000  |
|             | 6  | 1.315496000  | 0.171302000  | -0.300756000 |
|             | 8  | 1.553856000  | 0.003370000  | -1.676523000 |
|             | 6  | 0.208580000  | 1.219050000  | -0.211710000 |
|             | 1  | 0.024266000  | -1.462597000 | -0.422524000 |
|             | 1  | 2.204827000  | -0.732202000 | -1.816056000 |
|             | 35 | 3.212149000  | -2.790712000 | -1.467009000 |
|             | 1  | 0.446576000  | -2.717923000 | 1.540688000  |
| <b>TS-9</b> | 6  | -1.183430000 | 2.761251000  | -0.803322000 |
|             | 6  | 0.144580000  | 2.337643000  | -0.567871000 |
|             | 6  | 1.156549000  | 3.314524000  | -0.464739000 |
|             | 6  | 0.825065000  | 4.660183000  | -0.575602000 |
|             | 6  | -0.507680000 | 5.061484000  | -0.797745000 |

|    |              |              |              |
|----|--------------|--------------|--------------|
| 6  | -1.522262000 | 4.116259000  | -0.919198000 |
| 6  | 0.262372000  | 0.887984000  | -0.536383000 |
| 1  | 2.188334000  | 3.016150000  | -0.307643000 |
| 1  | 1.604408000  | 5.412922000  | -0.493618000 |
| 1  | -0.746656000 | 6.118273000  | -0.879761000 |
| 1  | -2.549632000 | 4.421018000  | -1.097641000 |
| 16 | -2.273092000 | 1.398430000  | -0.921651000 |
| 6  | 3.616983000  | -0.233577000 | 0.349331000  |
| 6  | 3.396709000  | -1.044463000 | -0.803118000 |
| 6  | 4.418865000  | -1.917290000 | -1.226982000 |
| 6  | 5.606727000  | -1.970095000 | -0.502739000 |
| 6  | 5.797905000  | -1.165266000 | 0.643927000  |
| 6  | 4.809173000  | -0.287028000 | 1.083080000  |
| 6  | 1.550291000  | 0.207483000  | -0.437297000 |
| 6  | 2.076391000  | -0.738553000 | -1.291782000 |
| 1  | 4.283186000  | -2.544477000 | -2.104857000 |
| 1  | 6.400635000  | -2.641752000 | -0.819463000 |
| 1  | 6.734497000  | -1.230356000 | 1.191749000  |
| 1  | 4.958291000  | 0.335438000  | 1.961621000  |
| 7  | 2.493720000  | 0.544745000  | 0.527666000  |
| 1  | 2.265405000  | 1.040303000  | 1.379686000  |
| 6  | 1.374703000  | -1.338522000 | -2.473951000 |
| 1  | 0.855237000  | -0.566773000 | -3.056503000 |
| 1  | 2.120304000  | -1.783742000 | -3.143303000 |
| 6  | 0.371839000  | -2.448830000 | -2.110398000 |
| 1  | 0.223692000  | -3.086006000 | -2.988254000 |
| 7  | -0.993345000 | -2.006919000 | -1.757140000 |
| 1  | -1.595698000 | -2.825229000 | -1.782974000 |
| 6  | -3.253284000 | -1.298446000 | 1.063827000  |
| 6  | -4.600812000 | -1.492585000 | 1.373126000  |
| 6  | -5.524085000 | -1.779221000 | 0.363277000  |
| 6  | -5.087598000 | -1.869824000 | -0.960192000 |
| 6  | -3.736047000 | -1.691383000 | -1.271154000 |
| 6  | -2.800371000 | -1.420689000 | -0.259645000 |
| 1  | -2.561598000 | -1.052592000 | 1.862249000  |
| 1  | -4.928928000 | -1.407545000 | 2.405506000  |
| 1  | -6.573113000 | -1.925775000 | 0.605734000  |
| 1  | -5.795315000 | -2.079166000 | -1.757682000 |
| 1  | -3.418809000 | -1.748640000 | -2.307084000 |
| 6  | -1.307479000 | -1.231898000 | -0.595196000 |
| 8  | -0.497309000 | -1.718571000 | 0.595557000  |
| 6  | -0.948297000 | 0.255074000  | -0.689001000 |
| 1  | -0.822680000 | -2.595576000 | 0.876052000  |
| 35 | -0.082740000 | 0.020696000  | 2.947510000  |

|              |              |              |              |              |
|--------------|--------------|--------------|--------------|--------------|
|              | 1            | 0.805318000  | -3.077855000 | -1.320372000 |
|              | 1            | -0.326500000 | -0.939357000 | 1.660450000  |
| <b>INT-9</b> | 6            | -1.328202000 | 2.759920000  | -0.379135000 |
|              | 6            | -0.014934000 | 2.327553000  | -0.067031000 |
|              | 6            | 0.972514000  | 3.297341000  | 0.220984000  |
|              | 6            | 0.631618000  | 4.641079000  | 0.206869000  |
|              | 6            | -0.684184000 | 5.050040000  | -0.100911000 |
|              | 6            | -1.670478000 | 4.119299000  | -0.406107000 |
|              | 6            | 0.131668000  | 0.892717000  | -0.158751000 |
|              | 1            | 1.991224000  | 2.992121000  | 0.437011000  |
|              | 1            | 1.386947000  | 5.389872000  | 0.426272000  |
|              | 1            | -0.930032000 | 6.108117000  | -0.104405000 |
|              | 1            | -2.679342000 | 4.436091000  | -0.652129000 |
|              | 16           | -2.386984000 | 1.421583000  | -0.738743000 |
|              | 6            | 3.378352000  | -0.331819000 | 0.963003000  |
|              | 6            | 3.250474000  | -1.053346000 | -0.260335000 |
|              | 6            | 4.300764000  | -1.901827000 | -0.669090000 |
|              | 6            | 5.421118000  | -2.020777000 | 0.144135000  |
|              | 6            | 5.519097000  | -1.307082000 | 1.362912000  |
|              | 6            | 4.504246000  | -0.455745000 | 1.788774000  |
|              | 6            | 1.387051000  | 0.193965000  | 0.052166000  |
|              | 6            | 1.975608000  | -0.704974000 | -0.819023000 |
|              | 1            | 4.233576000  | -2.457562000 | -1.600865000 |
|              | 1            | 6.237088000  | -2.672870000 | -0.155555000 |
|              | 1            | 6.408148000  | -1.423292000 | 1.976916000  |
|              | 1            | 4.583473000  | 0.096916000  | 2.720827000  |
|              | 7            | 2.246647000  | 0.440041000  | 1.114335000  |
|              | 1            | 2.002552000  | 0.953456000  | 1.950652000  |
|              | 6            | 1.351440000  | -1.136554000 | -2.111701000 |
|              | 1            | 0.842575000  | -0.292591000 | -2.589968000 |
|              | 1            | 2.116640000  | -1.474969000 | -2.819320000 |
|              | 6            | 0.383262000  | -2.301327000 | -1.944240000 |
|              | 1            | -0.121301000 | -2.532482000 | -2.890766000 |
|              | 7            | -0.694616000 | -2.144184000 | -0.931786000 |
|              | 1            | -1.071654000 | -3.053491000 | -0.672282000 |
|              | 6            | -3.053460000 | -0.987042000 | 1.430748000  |
|              | 6            | -4.216789000 | -1.411764000 | 2.068650000  |
|              | 6            | -5.041182000 | -2.368207000 | 1.464166000  |
| 6            | -4.695054000 | -2.909950000 | 0.222226000  |              |
| 6            | -3.519527000 | -2.508003000 | -0.411518000 |              |
| 6            | -2.691071000 | -1.539196000 | 0.187337000  |              |
| 1            | -2.412074000 | -0.250754000 | 1.904587000  |              |
| 1            | -4.481019000 | -0.996715000 | 3.036675000  |              |
| 1            | -5.953805000 | -2.687478000 | 1.959315000  |              |

|  |   |              |              |              |
|--|---|--------------|--------------|--------------|
|  | 1 | -5.341022000 | -3.640147000 | -0.255939000 |
|  | 1 | -3.268924000 | -2.914313000 | -1.387657000 |
|  | 6 | -1.417018000 | -1.142468000 | -0.465008000 |
|  | 6 | -1.065600000 | 0.264778000  | -0.504451000 |
|  | 1 | 0.926181000  | -3.195924000 | -1.629335000 |

Table. Electronic energies ( $E^{B3}$ , a.u.), Gree free energies ( $G^{B3}$ , a.u), number and values of imaginary frequencies (NIF/VIF,  $\text{cm}^{-1}$ ) calculated at the B3LYP/6-31+G\* level of theory, and electronic energies ( $E^{m06}$ , a.u.) calculated at the m06/6-311++g(3df,2p) level of theory.

| Name           | $E^{B3}$     | $G^{B3}$     | $E^{m06}$    | NIF | VIF      |
|----------------|--------------|--------------|--------------|-----|----------|
| <b>1a</b>      | -855.920655  | -855.8738051 | -855.7502479 | 0   |          |
| <b>3a</b>      | -958.671124  | -958.5145877 | -958.4273454 | 0   |          |
| <b>3a-LB</b>   | -497.821701  | -497.6744627 | -497.5879962 | 0   |          |
| <b>TS-1</b>    | -1814.553723 | -1814.323285 | -1814.15449  | 1   | -624.1 i |
| <b>INT-1</b>   | -1814.572835 | -1814.331256 | -1814.174951 | 0   |          |
| <b>TS-2</b>    | -1814.547789 | -1814.314716 | -1814.155287 | 1   | -606.1 i |
| <b>ClH2O</b>   | -536.82118   | -536.8364296 | -536.8096731 | 0   |          |
| <b>INT-2</b>   | -1277.743806 | -1277.522602 | -1277.353211 | 0   |          |
| <b>TS-3</b>    | -1277.726128 | -1277.502548 | -1277.339756 | 1   | -278.6 i |
| <b>INT-3</b>   | -1277.731652 | -1277.507126 | -1277.346582 | 0   |          |
| <b>HClH2O</b>  | -537.243123  | -537.2503394 | -537.2382266 | 0   |          |
| <b>INT-3-1</b> | -1277.31365  | -1277.101997 | -1276.9296   | 0   |          |
| <b>TS-4</b>    | -1277.271041 | -1277.064094 | -1276.880158 | 1   | -270.7 i |
| <b>CO</b>      | -113.318098  | -113.3418975 | -113.2943126 | 0   |          |
| <b>INT-4</b>   | -1163.976688 | -1163.772642 | -1163.602247 | 0   |          |
| <b>2a</b>      | -2956.040156 | -2955.964597 | -2958.161626 | 0   |          |
| <b>TS-5</b>    | -4120.014475 | -4119.701222 | -4121.762171 | 1   | -377.4 i |
| <b>INT-5</b>   | -4120.049762 | -4119.735674 | -4121.805508 | 0   |          |
| <b>INT-5-1</b> | -4120.034572 | -4119.722174 | -4121.792517 | 0   |          |
| <b>TS-6</b>    | -4120.006561 | -4119.691585 | -4121.775099 | 1   | -339.8 i |
| <b>INT-6</b>   | -4120.014606 | -4119.698204 | -4121.783182 | 0   |          |
| <b>INT-6-1</b> | -4120.030913 | -4119.710574 | -4121.799684 | 0   |          |
| <b>TS-7</b>    | -4120.017718 | -4119.705075 | -4121.783698 | 1   | -186.2 i |
| <b>INT-7</b>   | -4120.024827 | -4119.718502 | -4121.792582 | 0   |          |
| <b>INT-7-1</b> | -4120.069162 | -4119.753733 | -4121.830643 | 0   |          |
| <b>TS-8</b>    | -4120.025539 | -4119.709783 | -4121.794602 | 1   | -135.8 i |
| <b>INT-8</b>   | -4120.046386 | -4119.725048 | -4121.817061 | 0   |          |
| <b>TS-9</b>    | -4120.009035 | -4119.696405 | -4121.782205 | 1   | -620.3 i |
| <b>INT-9</b>   | -1471.694912 | -1471.395777 | -1471.168634 | 0   |          |
| <b>BrH2O</b>   | -2648.342485 | -2648.359366 | -2650.636228 | 0   |          |

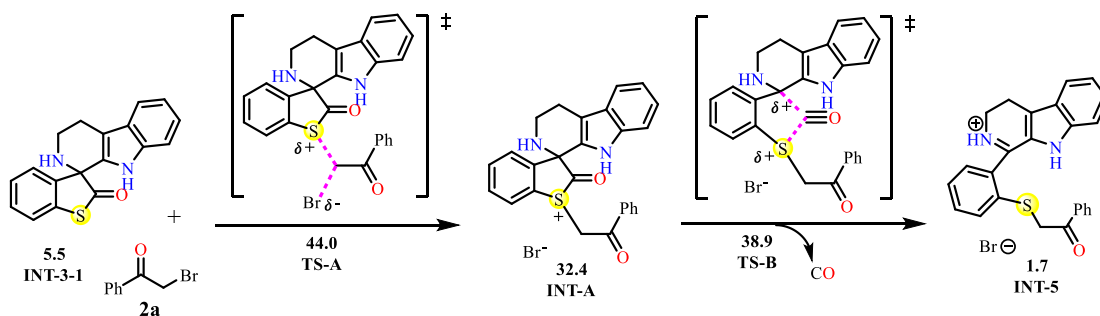

**Figure S1.** The mechanism in which alkylation of sulfur is prior to decarbonylation. However, this mechanism is quite inaccessible, because **TS-A** involves a free-energy barrier of 44.0 kcal/mol. It is understandable that the sulfur atom close to an electron-withdrawing carbonyl group is a poor nucleophile.

### 13. Computational Details

All calculations were finished under the Gaussian 16 computational program.<sup>[1]</sup> Geometries were optimized using the B3LYP density functional method<sup>[2]</sup> and the 6-31+g\* basis sets for all atoms, in which the solvation effect of DMF was simulated by the default PCM option.<sup>[3]</sup> Frequency analyses were performed at the same level of theory, in order for Gibbs free-energy calculations (423.15 K and 1 atm) and to ensure that all the optimized stationary points resided at the minima or first-order saddle points. Single-point energy corrections were carried out using the m06 density functional method<sup>[4]</sup> and the 6-311++g(3df,2p) basis sets for all atoms with the same solvation model.

### 14. References

- [1] *Gaussian 16, Revision C.02*, Gaussian, Inc., Wallingford, CT, 2016.  
 [2] (a) A. D. Becke, *J. Chem. Phys.* 1993, **98**, 5648-5652; (b) P. J. Stephens, F. J. Devlin, C. F. N. Chabalowski and M. J. Frisch, *J. Phys. Chem.* 1994, **98**, 11623-11627.  
 [3] G. Scalmani and M. J. Frisch, *J. Chem. Phys.* 2010, **132**, 114110.  
 [4] Y. Zhao and D. G. Truhlar, *J. Chem. Phys.* 2006, **125**, 194101.
